# Supplementary material
Source: PubMed Central journal article supplement (PMC4083109)

## **Supporting Information:**

### **Ischemia in tumors induces early and sustained phosphorylation changes in stress kinase pathways but does not affect global protein levels**

Philipp Mertins, Feng Yang, Tao Liu, DR Mani, Vladislav A. Petyuk, Michael A. Gillette, Karl R. Clauser, Jana W. Qiao, Marina A. Gritsenko, Ronald J. Moore, Douglas A. Levine, Reid Townsend, Petra Erdmann-Gilmore, Jacqueline E. Snider, Sherri R. Davies, Kelly V. Ruggles, David Fenyo, R. Thomas Kitchens, Shunqiang Li, Narciso Olvera, Fanny Dao, Henry Rodriguez, Daniel W. Chan, Daniel Liebler, Forest White, Karin D. Rodland, Gordon B. Mills, Richard D. Smith, Amanda G. Paulovich, Matthew Ellis and Steven A. Carr

On behalf of the Clinical Proteomic Tumor Analysis Consortium (CPTAC)

## **SI Materials and Methods:**

### **Preparation of ovarian tumor samples for proteomic analysis:**

After obtaining consent to IRB-approved protocols, tissue was collected from four patients with high-grade serous ovarian carcinoma. Each patient was under general anesthesia and had a large midline vertical incision that identified advanced disease (FIGO stage IIIC or IV). Prior to performing primary tumor resection and before any compromise to vascular supply, a portion of ovarian tumor attached to the omentum was rapidly resected using sharp or blunt dissection. The tumor specimen was immediately dissected into four contiguous and adjacent specimens strips each no larger than 10 x 3 x 3 mm. Tumor strips were placed into cryovials and frozen in liquid nitrogen at specified time points. The first specimen was processed as quickly as possible with an elapsed time from resection to freezing of 1 minute or less. The average weight of all tumor specimens was 215 mg. All specimens were then stored at -80 °C freezers until shipment to a central processing facility as described below. For pathology review, sections were obtained after the first and third section (0 and 30 min time points) for assessment of tumor content. Each tumor section evaluated contained 80% tumor cell nuclei or greater.

### **Generation and preparation of xenograft tumor samples for proteomic analysis:**

Patient-derived xenograft tumors (PDX tumors) from established basal (WHIM6) and luminal (WHIM20) breast cancer subtypes were raised subcutaneously in 8 week old NOD.Cg-*Prkdc*<sup>scid</sup>*Il2rg*<sup>tm1Wjl</sup>/SzJ mice (Jackson Labs, Bar Harbor, Maine) as previously described (22, 23). Tumors from each animal were harvested by surgical excision at approximately 1.5 cm<sup>3</sup>, rapidly divided into 4 pieces, and snap-frozen by immersion in a liquid nitrogen bath at times 0 (~ 30 s), 5, 30 and 60 minutes post-excision. The snap frozen tumor tissues for individual time points were then placed in pre-cooled tubes on dry ice and stored at -80 °C until cryopulverization. Three time course sets from multiple mice (n) were obtained as biological replicates (BR) of both luminal and basal subtypes: basal (BA1 (n=6); BA2 (n=5); BA3 (n=6)) and luminal (LU1 (n=10); Lu2 (n=6); Lu3 (n=6)).

Processing of ovarian cancer tumor samples and breast cancer PDX tumor samples by cryopulverization was done centrally at Washington University, St. Louis (Ellis Lab). Tumor pieces were transferred into pre-cooled Covaris Tissue-Tube 1 Extra (TT01xt) bags (Covaris #520007) and processed in a Covaris CP02 Cryoprep device using different impact settings according to the total tumor tissue weight: <250mg=3; 250-350 mg=4; 350-440 mg=5; 440-550 mg=6 . Tissue powder was transferred to an aluminum weighing dish (VWR #1131-436) and the tissue was thoroughly mixed with a metal spatula precooled in liquid nitrogen. The tissue powder was then partitioned (~ 100 mg aliquots) into precooled cryovials (Corning #430487). (Note: Cryopulverized tissue will melt if transferred to a plastic weighing boat). All procedures were carried out on dry ice to maintain tissue in a powdered, frozen state.

### **RPPA Analysis:**

Protein expression or phosphorylation was measured by reverse phase protein arrays (RPPAs) as previously described (9). All Tissue-Tubes were rinsed with 60  $\mu$ l RPPA Lysis buffer containing: 1 % Triton X-100, 50mM HEPES, pH 7.4, 150 mM NaCl, 1.5 mM MgCl<sub>2</sub>, 1 mM EGTA, 100 mM NaF, 10 mM Na pyrophosphate, 1 mM Na<sub>3</sub>VO<sub>4</sub>, 10 % glycerol, containing freshly added protease and phosphatase inhibitors from Roche Applied Science (Cat. # 05056489001 and 04906837001). Samples were extracted using the Barocycler NEP3229 (Pressure Biosciences, Inc.) with the following settings: 35 Kpsi for 30 seconds, then 20 seconds at ambient pressure for 20 cycles. Samples were transferred to a 0.5 mL Eppendorf tube and centrifuged at 16K rcf for 5 minutes to remove particulates. The supernatant was transferred into a new 0.5 mL Eppendorf tube and the protein concentration determined by Advanced protein assay kit (Cytoskeleton, Inc, Denver, Co) on a Biotek Synergy H1M at 590 nm. Samples were adjusted to a final protein concentration of 1-1.5 mg/mL by the addition of RPPA Lysis buffer before the addition of 4X SDS sample buffer without Bromophenol Blue (3 parts of cell lysate plus one part of 4X SDS sample buffer). Samples were boiled for 5 minutes before printing onto nitrocellulose-coated glass slides (FAST Slides, Schleicher & Schuell BioScience, Inc., Keene, NH) with an automated Aushon arrayer (Aushon Biosystems, Burlington, MA) as previously described (42). The 3,3'-diaminobenzidine tetrachloride (DAB)-based DAKO signal amplification system (DAKO, Copenhagen, Denmark) was used to detect and amplify antibody-binding intensity. A biotinylated secondary antibody was used as a starting point for signal amplification. Signal intensity was measured by scanning the slides and quantifying with MicroVigene software (VigeneTech Inc., Carlisle, MA) to generate spot level signal intensity data. The protein concentration levels in the samples were estimated using Supercurve (version 1.5.0) developed by the Department of Bioinformatics and Computational Biology at the University of Texas MD Anderson Cancer Center, (<http://bioinformatics.mdanderson.org/OOMPA>). The program fits a single non-decreasing spline curve using all the dilution series on a slide (hence the name "SuperCurve") with the signal intensity as the response variable and the dilution steps as independent variable (43) to estimate some basic parameters and then estimate the IC<sub>50</sub> of each dilution series. All data were then normalized for protein loading by linear transformation using the median expression level across all antibody experiments followed by a Log<sub>2</sub> transformation. A total of 40

phosphorylation-site specific antibodies and 87 protein specific antibodies were used in this study for RPPA measurements across all different tumor types (see Table S3).

### **Protein extraction, digestion, labeling and MS analysis of peptides from patient-derived ovarian tumors (Pacific Northwest National Laboratories)**

*Protein extraction, digestion and labeling of peptides:* The pulverized human ovarian cancer tissue samples (~50 mg tissue weight) were homogenized in 500  $\mu$ l lysis buffer containing 8 M urea, 75 mM NaCl in 100mM  $\text{NH}_4\text{HCO}_3$  (pH 7.8), 10 mM NaF, phosphatase inhibitor cocktail 2 (Sigma, P 5726) and cocktail 3 (Sigma, P0044), Complete (Roche, 05 892 791 001). Lysates were precleared by centrifugation at 16,500 g for 5 min and protein concentrations were determined by BCA assay (Pierce). Proteins were reduced with 5 mM dithiothreitol for 1 h at 37°C, and were subsequently alkylated with 10 mM iodoacetamide. Samples were diluted 2-fold with 50 mM  $\text{NH}_4\text{HCO}_3$  and digested with trypsin (Promega, V5113) at a ratio of 1:50 trypsin:protein (w/w) for 4 h at 37°C, diluted by 4-fold, and subjected to a second treatment with trypsin and incubation at room temperature overnight (~16 h). The digest was acidified with trifluoroacetic acid (TFA) to pH ~2.5. Tryptic peptides were desalted on reversed phase C18 SPE columns (SUPELCO Discovery, 50 mg, 52601-U) and dried using SpeedVac.

Desalted peptides were labeled with 4-plex iTRAQ reagents according to the manufacturer's instructions (AB Sciex, Foster City, CA). For 500  $\mu$ g peptide from each ovarian cancer time point sample, 5 units of labeling reagent were used. Peptides were dissolved in 150  $\mu$ L of 0.5 M triethylammonium bicarbonate (TEAB) (pH 8.5) solution and labeling reagent was added in 350  $\mu$ L of ethanol. After 1 h incubation, 1.5 mL of 0.05% TFA was added to stop the reaction and hydrolyze the unreacted iTRAQ reagents. Differentially labeled peptides were mixed and subsequently desalted on 50 mg C18 SPE columns.

#### *Offline fractionation of peptides and preparation of proteome and phosphoproteome samples:*

iTRAQ-labeled peptides from ovarian tissues were separated on a RP XBridge C18 column from Waters (250 mm  $\times$  4.6 mm column containing 5  $\mu$ M particles and a 4.6 mm  $\times$  20 mm guard column) using Agilent 1200 HPLC System. The sample loaded onto the C18 column was washed for 9 min with 5% of solvent B (10 mM TEAB, pH 7.5, 90% ACN), followed by 10 min solvent A (10 mM TEAB, pH 7.5) equilibration before an 109 min LC gradient. The LC gradient started with a linear increase of solvent A to 10% B in 3 min, then linearly increased to 30% B in 86 min, 10 min to 42.5% B, 5 min to 55% B and another 5 min to 100% solvent B. The flow rate was 0.5 mL/min. A total of 96 fractions were collected into a 96 well plate through the LC gradient. The high pH RP fractions were combined into 24 fractions using the concatenation strategy reported in our previous study (24). For proteome analysis, ~ 5% of each concatenated fraction was dried down and re-suspended in 0.1% TFA to a peptide concentration of 0.15  $\mu$ g/ $\mu$ L. The rest of the concatenated fractions (95%) were further concatenated into 12 fractions and subjected to immobilized metal affinity chromatography (IMAC) for phosphopeptide enrichment. Magnetic  $\text{Fe}^{3+}$ -NTA-agarose beads were prepared using the Ni-NTA-agarose beads (Qiagen, Valencia, CA,) following the protocols reported (44, 45). Briefly, peptides (~100-

150 µg) were reconstituted in 300 µL IMAC binding/wash buffer (80% MeCN, 0.1% TFA) and incubated for 30 min with 75 µL of the 5% bead suspension. After incubation, the beads were washed 4 times each with 300 µL of wash buffer. Phosphorylated peptides were eluted from the beads using 50-75 µL of 1:1 ratio of acetonitrile to 2.5 % ammonia in 2 mM (pH 8) phosphate buffer (v/v) after incubating for 1.5 min. Samples were acidified and concentrated, then were reconstituted to 30 µL with 0.1% TFA for LC-MS/MS analysis.

#### *Mass-spectrometry based analysis of ovarian tumor samples:*

All peptide samples were analyzed using an automated home-built constant flow nano LC system (Agilent) coupled to an LTQ Orbitrap Velos mass spectrometer (Thermo Fisher Scientific). Electrospray emitters were custom made using either 360 µm o.d. (phosphoproteomics) or 150 µm (global proteomics) o.d. x 20 µm i.d. chemically etched fused silica (46). The nano LC system for phosphoproteomics analysis has an online 4-cm x 360 µm o.d. x 150 µm i.d. C18 SPE column (5-µm Jupiter C18, Phenomenex, Torrance, CA) to desalt each phosphopeptide sample (20 µL), which is connected to a home-made 60-cm x 360 µm o.d. x 50 µm i.d. capillary column (3-µm Jupiter C18, Phenomenex, Torrance, CA). Mobile phase flow rate was 100 nL/min and consisted of 0.1M acetic acid in water (A) and 0.1M acetic acid in 70:30 (v/v) acetonitrile:water (B) with a gradient profile as follows (min:%B); 0:0, 5:10, 140:35, 160:60, 165:90, 170:90. For global proteome analysis, an on-line 4-cm x 360 µm o.d. x 150 µm i.d. SPE column packed with 3.6-µm Aeris Widepore XB-C18 and a 35-cm x 360 µm o.d. x 75 µm i.d. fused-silica capillary analytical column (3 µm Jupiter C18) were used. Mobile phases consisted of 0.1% formic acid in water (A) and 0.1% formic acid acetonitrile (B) operated at 300 nL/min with a gradient profile as follows (min:%B); 0:5, 2:8, 20:12, 75:35, 97:60, 100: 85.

The LTQ Orbitrap Velos mass spectrometer was operated in the data-dependent mode acquiring higher-energy collisional dissociation (HCD) scans ( $R=7,500$ ,  $5 \times 10^4$  target ions) after each full MS scan ( $R=30,000$ ,  $3 \times 10^6$  target ions) for the top ten most abundant ions within the mass range of 300 to 1800  $m/z$ . An isolation window of 2.5 Th was used to isolate ions prior to HCD. All HCD scans used a normalized collision energy of 45 and a maximum inject time of 1000 ms. The dynamic exclusion time was set to 60 s and charge state screening was enabled to reject unassigned and singly charged ions.

#### **Protein extraction, digestion, labeling and MS analysis of peptides from PDX breast cancer tumors (Broad Institute)**

##### *Protein extraction, digestion and iTRAQ labeling of peptides:*

Cryopulverized xenograft breast cancer tissues (~75 mg tissue weight) were homogenized in 1000 µL lysis buffer containing 8M urea, 75mM NaCl, 1mM EDTA in 50mM Tris HCl (pH 8), 10 mM NaF, phosphatase inhibitor cocktail 2 (1:100; Sigma, P5726) and cocktail 3 (1:100; Sigma, P0044), 2 µg/mL aprotinin (Sigma, A6103), 10 µg/mL Leupeptin (Roche, #11017101001), and 1 mM PMSF (Sigma, 78830). Lysates were centrifuged at 20,000 g for 10 minutes before measuring protein concentration of the clarified lysates by BCA assay (Pierce). Protein lysates were subsequently reduced with 5 mM dithiothreitol (Thermo Scientific, 20291) for 45 minutes at

room temperature, and alkylated with 10 mM iodoacetamide (Sigma, A3221) for 45 minutes. Samples were diluted 4-fold with 50mM Tris HCl (pH 8) prior to digesting them with trypsin (Promega, V511X) at a 1:50 enzyme-to-protein ratio at room temperature overnight on a shaker.

Digested samples were acidified with formic acid (FA; Fluka, 56302) to a final volumetric concentration of 1 % or final pH of ~3-5, and centrifuged at 2,000 g for 5 minutes to clear precipitated urea from peptide lysates. Samples were desalted on tC18 SepPak columns (Waters, 100mg, WAT036820) and 1.5 mg peptide aliquots were dried down using a SpeedVac apparatus.

Desalted peptides were labeled with 4-plex iTRAQ reagents as directed by the manufacturer (AB Sciex, Foster City, CA), where 15 units of labeling reagent were used for each time-point sample. Samples were dissolved in 450uL 0.5M triethylammonium bicarbonate (TEAB; pH 8.5), 15 iTRAQ label units were diluted with ethanol to a final volume of 1.05 mL and immediately added to the peptide sample. After 1 hour, iTRAQ labeling reactions were quenched with 225  $\mu$ L Tris HCl (pH 8.0). Differently labeled peptides were then mixed to generate a 4-plex iTRAQ sample, and desalted on 500mg tC18 SepPak columns (Waters, 500mg, WAT036790).

#### *Offline fractionation of peptides and preparation of proteome and phosphoproteome samples:*

Desalted 4-plex iTRAQ labeled peptides were reconstituted in 900  $\mu$ L 20mM ammonium formate (pH 10), loaded on a 4.6mm x 250mm column RP Zorbax 300 A ExtendC18 column (Agilent, 3.5  $\mu$ m bead size), and separated on an Agilent 1100 Series HPLC instrument by basic reversed-phase chromatography. Solvent A (2% acetonitrile, 5 mM ammonium formate, pH 10) and a nonlinear increasing concentration of solvent B (90% acetonitrile, 5 mM ammonium formate, pH 10) were used to separate peptides according to their hydrophobicity. Prior to loading samples, the C18 column was washed for 70 minutes using an LC gradient consisting of two solvent A-to-solvent B washing cycles. The 90 minute separation LC gradient began with 100% solvent A for 9 minutes, then a linear increase in percentage of solvent B to 6% in 4 min, 6% to 28.5% in 50 min, 28.5% to 34% in 5.5 min, 34% to 60% in 13 min, and another 8.5 min at 60% solvent B. The flow rate was 1 mL/min. A total of 84 fractions were collected into a 96 x 2mL well plates (Whatman, #7701-5200), which were combined in a step-wise concatenation strategy as reported previously (24). 5% of the volume of each proteome fraction was allocated for proteome analysis, dried down, and re-suspended in 3% MeCN/0.1% FA to a peptide concentration of 1  $\mu$ g/uL for LC-MS/MS. The remaining 95% of concatenated fractions were further combined into 12 fractions that were enriched for phosphopeptides using immobilized metal affinity chromatography (IMAC). Ni-NTA agarose beads were used to prepare Fe<sup>3+</sup>-NTA-agarose beads, following a method adapted from Ficarro et al. (44). In each phosphoproteome fraction, ~500  $\mu$ g peptides were reconstituted in 1,000  $\mu$ L 50% MeCN/0.1% TFA solvent and incubated with 10  $\mu$ L of the IMAC beads for 30 minutes. After incubation, samples were briefly spun down on a tabletop centrifuge, and the clarified peptide flow-through was separated from the beads, and the beads were reconstituted in 150  $\mu$ L IMAC binding/wash buffer (80 MeCN/0.1% TFA) and loaded on equilibrated Empore C18 silica-packed stage tips (3M, 2315) as described in a previous publication (14). Samples were then washed twice with 50  $\mu$ L of IMAC binding/wash buffer, once with 100uL 1% FA, then eluted from the IMAC beads to the stage tips with 3 x 70uL washes of 500mM dibasic sodium phosphate (pH 7.0, Sigma S9763). Stage tips were washed once with 100  $\mu$ L 1%FA and eluted from the stage tips with 60uL 50%

MeCN/0.1% FA. Phosphopeptides were dried down and re-suspended in 9  $\mu$ L 50% MeCN/0.1%FA for LC-MS/MS analysis.

### **Mass-spectrometry based analysis of tumor samples**

All peptides were separated with an online nanoflow EASY-nLC 1000 UHPLC system (Proxeon, Thermo Fisher Scientific) and analyzed on a benchtop Orbitrap Q Exactive mass spectrometer (Thermo Fisher Scientific) equipped with a nanoflow ionization source (James A. Hill Instrument Services, Arlington, MA). The LC system was connected to a custom-fit tee (360  $\mu$ m, IDEX Health & Science, UH-753), and columns were heated to 50  $^{\circ}$ C using column heater sleeves (Phoenix-ST) to prevent overpressurizing of columns during UHPLC separation. As the implemented IMAC enrichment procedure included an integrated desalting step, phosphoproteome samples were directly loaded onto the nano LC system for analysis. 10% of each global proteome sample, and 50% of each phosphoproteome sample were injected onto an in-house packed 20cm x 75 $\mu$ m dia. C18 silica picofrit capillary column (1.9  $\mu$ m ReproSil-Pur C18-AQ medium, Dr. Maisch GmbH, r119.aq; Picofrit 10 $\mu$ m tip opening, New Objective, PF360-75-10-N-5). Mobile phase flow rate was 200 nL/min, comprised of 3% acetonitrile/0.1% formic acid (Solvent A) and 90% acetonitrile /0.1% formic acid (Solvent B), and the 150-minute LC-MS/MS method consisted of a 10-min column-equilibration procedure, 20-min sample-loading procedure, and the following gradient profile: (min:%B) 0:0; 2:6; 84:30; 87:60; 90:90; 105:90; 106:50; 120:50 (last two steps at 500 nL/min flowrate). Data-dependent acquisition was performed using Xcalibur 2.2 software in positive ion mode at a spray voltage of 2.00 kV. MS1 Spectra were measured with a resolution of 70,000, an AGC target of 3e6 and a mass range from 300 to 1800 m/z. Up to 12 MS2 spectra per duty cycle were triggered at a resolution of 17,500, an AGC target of 5e4, an isolation window of 2.5 m/z, a maximum ion time of 120 msec, and a normalized collision energy of 28. Peptides that triggered MS2 scans were dynamically excluded from further MS2 scans for 20 sec. Charge state screening was enabled to reject precursor charge states that were unassigned, 1, or >6. Peptide match was enabled for monoisotopic precursor mass assignment.

All mass spectra, in the original instrument vendor format, contributing to this study may be downloaded from

<https://cptac-data-portal.georgetown.edu/cptacPublic/> for the two study names: Time Course Breast Cancer (0,5,30,60) and Time Course Ovarian Cancer (0,5,30,60).

URLs with the web address for annotated MS2-spectra are provided for every identified phosphopeptide in Supplemental Table S2.

### **Protein identification, phosphosite localization, and quantification**

All MS data for ovarian and breast cancer PDX samples were interpreted using the Spectrum Mill software package v4.1 beta (Agilent Technologies, Santa Clara, CA). Similar MS/MS spectra acquired on the same precursor m/z within +/- 60 sec were merged. MS/MS spectra were excluded from searching if they failed the quality filter by not having a sequence tag length > 0 (i.e., minimum of two masses separated by the in-chain mass of an amino acid) or did not have a precursor MH<sup>+</sup> in the range of 750-4000. MS/MS spectra from PDX breast cancer

tumors were searched against a RefSeq v37 database containing 32,799 human proteins, 29,617 mouse proteins, and porcine trypsin. The mouse proteins were omitted from the database when searching the MS/MS spectra from human ovarian cancer tumors. Scoring parameters were ESI-QEXACTIVE-HCD-v2, or ESI-ORBITRAP-HCD-v2 for whole proteome datasets from PDX and ovarian tumors respectively. ESI-QEXACTIVE-HCD-v3 parameters were used for all phosphoproteome datasets. All spectra were allowed +/- 20 ppm mass tolerance for precursor and product ions, 40% minimum matched peak intensity, and trypsin allow P enzyme specificity with up to 4 missed cleavages. Carbamidomethylation at cysteine and iTRAQ at N-termini and lysine were fixed modifications. Allowed variable modifications for whole proteome samples were oxidized methionine, deamidation of asparagine, and pyro-glutamic acid modification at N-terminal glutamine with a precursor MH+ shift range of -18 to 64 Da. For phosphoproteome samples the allowed variable modifications for whole proteome samples were oxidized methionine, acetylation of protein N-termini, and phosphorylation of serine, threonine, and tyrosine with a precursor MH+ shift range of 0 to 272 Da. Identities interpreted for individual spectra were automatically designated as confidently assigned using the Spectrum Mill autovalidation module to apply target-decoy based false-discovery rate (FDR) scoring threshold criteria via a two-step auto threshold strategy at the spectral and protein levels. For phosphoproteome samples the second step was omitted. First, peptide mode was set to allow automatic variable range precursor mass filtering with score thresholds optimized to yield a spectral level FDR of <1.2% for each precursor charge state in each LC-MS/MS run. Second, protein mode was applied to further filter all the peptide-level validated spectra combined from all LC-MS/MS runs derived from a single tumor sample using a maximum protein-level FDR of zero. The protein level step filters the results so that each identified protein is comprised of multiple peptides unless a single excellent scoring peptide was the sole match. For the whole proteome samples the above criteria yielded false discovery rates (FDR) of <1.1% for each sample at the peptide-spectrum match level and <2.0 % at the distinct peptide level as estimated by target-decoy-based searches using reversed sequences. For the phosphoproteome samples the FDR was <1.1% at the spectrum level and <2.3% at the distinct peptide level.

In calculating scores at the protein level and reporting the identified proteins, redundancy is addressed in the following manner: the protein score is the sum of the scores of distinct peptides. A distinct peptide is the single highest scoring instance of a peptide detected through an MS/MS spectrum. MS/MS spectra for a particular peptide may have been recorded multiple times, (i.e. as different precursor charge states, in adjacent bRP fractions, modified by deamidation at Asn or oxidation of Met, or different phosphosite localization) but are still counted as a single distinct peptide. When a peptide sequence >8 residues long is contained in multiple protein entries in the sequence database, the proteins are grouped together and the highest scoring one and its accession number are reported. In some cases when the protein sequences are grouped in this manner there are distinct peptides which uniquely represent a lower scoring member of the group (isoforms, family members, and different species). Each of these instances spawns a subgroup and multiple subgroups are reported and counted towards the total number of proteins in SI Table S1. The reporting of peptides contributing to each subgroup can be altered by enabling the subgroup-specific option in Spectrum Mill. This was done for the whole proteome PDX datasets primarily to include only species-specific peptides

for quantification, and thus exclude peptides found in both the human and mouse proteomes. This approach allowed us to distinguish mouse from human orthologs. Interestingly, human versions of the plasma proteins ceruloplasmin and serotransferrin were observed in the basal xenograft breast cancer samples with 10 and 3 ortholog-specific peptides, respectively. None of these human proteins were observed in the luminal breast cancer tumors. Both proteins are not exclusively plasma-specific proteins and can be expressed also in non-blood related tissues and cells (see [www.genecards.org](http://www.genecards.org)). Since gene expression is often deregulated in cancer it is not entirely surprising to detect these proteins at low levels in the basal breast cancer samples.

For each of the phosphoproteome samples 55 to 59% of all identified phosphopeptide MS/MS spectra yield fully localized phosphosites. The phosphosite tables organized across all the samples combine into a single row all non-conflicting observations of a particular phosphosite (i.e. different missed cleavage forms, different precursor charges, confident and ambiguous localizations, different sample handling modifications). The peptide form with the best localization score becomes the displayed representative of the combination. For a single peptide neither observations with a different number of phosphosites nor different confident localizations are allowed to be combined. While the Spectrum Mill identification score is based on the number of matching peaks, their ion type assignment, and the relative height of unmatched peaks, the phosphosite localization score is the difference in identification score between the top two localizations. The score threshold for confident localization ( $>1.1$ ), essentially corresponds to at least 1 b or y ion located between two candidate sites that has a peak height 10% of the tallest fragment ion (neutral losses of phosphate from the precursor and related ions as well as immonium and iTRAQ reporter ions are excluded from the relative height calculation). The ion type scores for b-H<sub>3</sub>PO<sub>4</sub>, y-H<sub>3</sub>PO<sub>4</sub>, b-H<sub>2</sub>O, and y-H<sub>2</sub>O ion types are all set to 0.5. This prevents inappropriate confident localization assignment when a spectrum lacks primary b or y ions between two possible sites but contains ions that can be assigned as either phosphate loss ions for one localization or water loss ions for another localization.

Relative abundances of proteins and phosphosites were determined using iTRAQ reporter ion intensity ratios from each MS/MS spectrum. The median ratio is calculated from all MS/MS spectra contributing to a protein subgroup in whole proteome samples or to a phosphosite in the phosphoproteome samples. To account for differences in total protein amount in between single time point samples within one iTRAQ 4-plex experiment, all iTRAQ time point ratios in the proteome as well as phosphoproteome datasets were normalized for the global population median in the corresponding proteome datasets. It is important to note that protein and phosphosite abundance ratios measured with iTRAQ quantification can be compressed by a factor of 20-30% due to co-isolation interference and that real effect sizes might be larger than what was measured (11, 47). In the final report of the phosphosite table only phosphosites are shown that have a positive maximum forward-reverse Spectrum Mill score across all experiments to remove reversed-decoy database hits. In addition only phosphosites are shown that contain iTRAQ ratio information for at least one experiment.



### ***Kinetic model of statistical data analysis:***

This model assumes that changes observed within a reasonably short period of time (1 hour at most) following perturbation (cold ischemia) can be described by the law of unidirectional chemical reaction (eq 1).

$$\log(Y) = \log(B + (A - B)e^{-kt}) + \varepsilon \quad (\text{eq 1})$$

Where Y is the measured relative protein concentration or abundance, A – starting concentration, B – final concentration, k – rate constant, t – time and  $\varepsilon$  is the normally distributed measurement error. To infer the A, B and k parameters we applied constrained Nelder-Mead optimization that minimizes the sum of squared errors. The imposed constraints are along the lines of chemical kinetic principles.  $A > 0$ ,  $B > 0$  as the concentrations cannot be negative.  $k > 0$  since no species can be exponentially growing. The statistical significance of chemical kinetic model was tested against null hypothesis model that assumes that there is not any change in the data associated with timepoints (eq 2).

$$\log(Y) = \log(C) + \varepsilon \quad (\text{eq 2})$$

Where C is the constant proteins abundance or concentration value. The fit of null hypothesis model is represented by a flat line. The statistical significance of the alternative model can be assessed using F-statistic that looks at the ratio of the sums of squared errors residuals taking into account the degrees of freedom of the alternative and null hypothesis models.

### ***Statistical analysis using the moderated F-test:***

Protein and phosphopeptide quantification tables from Spectrum Mill, with  $\text{Log}_2$  ratios normalized as specified above, are used for the statistical analysis. Each cold ischemia time point is treated as an independent group in an ANOVA analysis, with statistical significance being assessed using an F-test based on the ratio of between group to within group variability. This allowed capturing trends that are not unidirectional. To leverage information across observed proteins or phosphopeptides for more robust estimation of variance, we employed an empirical Bayes approach implemented as a moderated F-test in the Bioconductor “limma” package (48). The resulting p-values were adjusted for multiple testing using the Benjamini-Hochberg method (49).

## Supporting Information References:

42. Neeley ES, Baggerly KA, & Kornblau SM (2012) Surface Adjustment of Reverse Phase Protein Arrays using Positive Control Spots. *Cancer Inform* 11:77-86.
43. Hu J, *et al.* (2007) Non-parametric quantification of protein lysate arrays. *Bioinformatics* 23(15):1986-1994.
44. Ficarro SB, *et al.* (2009) Magnetic bead processor for rapid evaluation and optimization of parameters for phosphopeptide enrichment. *Anal Chem* 81(11):4566-4575.
45. Nguyen TH, *et al.* (2012) Quantitative phosphoproteomic analysis of soybean root hairs inoculated with *Bradyrhizobium japonicum*. *Mol Cell Proteomics* 11(11):1140-1155.
46. Kelly RT, *et al.* (2006) Chemically etched open tubular and monolithic emitters for nanoelectrospray ionization mass spectrometry. *Anal Chem* 78(22):7796-7801.
47. Ow SY, *et al.* (2009) iTRAQ underestimation in simple and complex mixtures: "the good, the bad and the ugly". *Journal of proteome research* 8(11):5347-5355.
48. Smyth GK (2004) Linear models and empirical bayes methods for assessing differential expression in microarray experiments. *Stat Appl Genet Mol Biol* 3:Article3.
49. Benjamini Y & Hochberg Y (1995) Controlling the False Discovery Rate: A Practical and Powerful Approach to Multiple Testing. *Journal of the Royal Statistical Society. Series B (Methodological)* 57(1):289-300.
50. Kelder T, *et al.* (2012) WikiPathways: building research communities on biological pathways. *Nucleic Acids Res* 40(Database issue):D1301-1307.
51. van Iersel MP, *et al.* (2008) Presenting and exploring biological pathways with PathVisio. *BMC Bioinformatics* 9:399.

### Supporting Information Table legends:

**Table S1:** Lists of all quantified proteins in ovarian cancer, and luminal/basal breast cancer samples.

**Table S2:** Merged list of all quantified phosphorylation-sites in ovarian cancer, and luminal/basal breast cancer samples.

**Table S3:** Comparison of cold ischemia time point data for phosphorylation-sites and proteins analyzed by RPPA and mass spectrometry (ovarian, luminal/basal breast cancer). Tabs indicated with "pSTY" contain annotation and quantification information for MS and RPPA data for all three tumor types. Tabs indicated with "protein" contain the corresponding information for proteins analyzed by MS or RPPA.

### Supporting Information Figure legends:

**Figure S1: Comparison of moderated F test and first-order kinetic modeling as statistical tests to identify regulated phosphosites.** Scatter plots showing the Benjamini-Hochberg corrected p-values for all quantified phosphosites. Axes are Log<sub>10</sub> scale and dashed lines indicate a p-value of 0.01.

**Figure S2: Inter-tumor differences in the kinetics of protein phosphorylation changes for kinases that were regulated by cold ischemia in all analyzed tumor types.** Up-regulated (U1-3; panel A) and down-regulated (D1-3; panel B) fuzzy c-means clusters are shown for the global phosphoproteome data. T<sub>1/2</sub> denotes the median half activation/decrease time for all phosphosites in each cluster. Kinase phosphosites with membership values  $\alpha > 0.7$  are marked with "X" for ovarian cancer (OC) or basal-like (BA) and luminal (LU) breast cancers.

**Figure S3: Hierarchical clustering of all phosphosites that were identified in all analyzed tumor types and also regulated in at least one of the tumor types.** Phosphosites that were quantified in all tumors and for which a cold ischemia regulation p-value  $< 0.01$  was observed in at least one of the tumor types were analyzed by hierarchical clustering using Gene-E (<http://www.broadinstitute.org/cancer/software/GENE-E>). Phosphosite rows were clustered with an euclidean distance metric. A global color scheme was used to display phosphosite ratios.

**Figure S4: Gene enrichment analysis of KEGG pathways enriched among cold-ischemia regulated phosphoproteins in ovarian tumors, basal-like or luminal breast tumors.** We used DAVID Bioinformatics Resources 6.7 (<http://david.abcc.ncifcrf.gov/>) (39) to test for enrichment of KEGG pathways in the up- and down-regulated phosphoproteome for each cancer type using a modified Fisher's exact test (EASE score). KEGG pathways with  $p < 0.01$  and a minimum occurrence of  $\geq 10$  genes/proteins were called significant. P-values were  $-\text{Log}_{10}$  transformed and the transformed values for each pathway were plotted as a heat map in Gene-E (<http://www.broadinstitute.org/cancer/software/GENE-E>).

**Figure S5: Regulated phosphoproteins in the JNK/p38 MAP kinase pathway.** Phosphoproteins with at least one ischemia-regulated phosphosite in the ovarian or breast tumors were mapped onto a modified version of the WikiPathways MAPK signaling pathway (<http://www.wikipathways.org/index.php/Pathway:WP382>) (50) using PathVisio ([www.pathvisio.org](http://www.pathvisio.org)) (51).

**Figure S6: Comparison of RPPA versus mass spectrometry for the small subset of overlapping phosphosites.** Averaged cold ischemia time point ratios quantified by mass spectrometry (iTRAQ) or reversed-phase protein arrays (RPPA) were plotted for ovarian cancer and basal-like/luminal breast cancers. Pearson correlation coefficients ( $r$ ) were calculated for each tumor type to compare quantification results obtained by mass spectrometry and RPPA.

**Figure S7: Annotated MS2-spectra of phosphopeptides for all 158 commonly cold ischemia-regulated phosphosites.** The highest scoring MS2 spectra for each phosphosite are shown.

**Figure S1:**

**Ovarian Cancer**

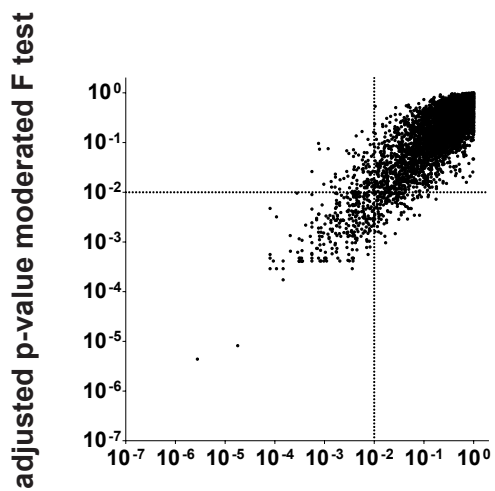

**Basal Breast Cancer**

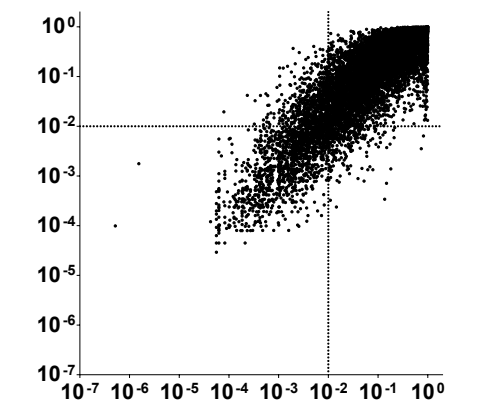

**Luminal Breast Cancer**

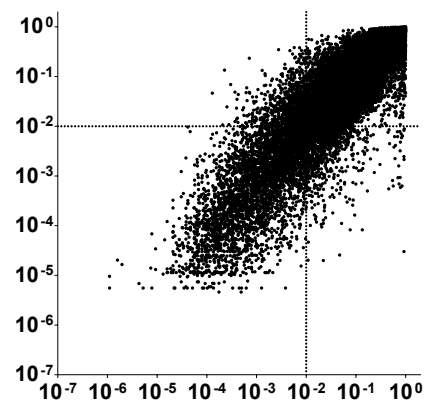

# Figure S2:

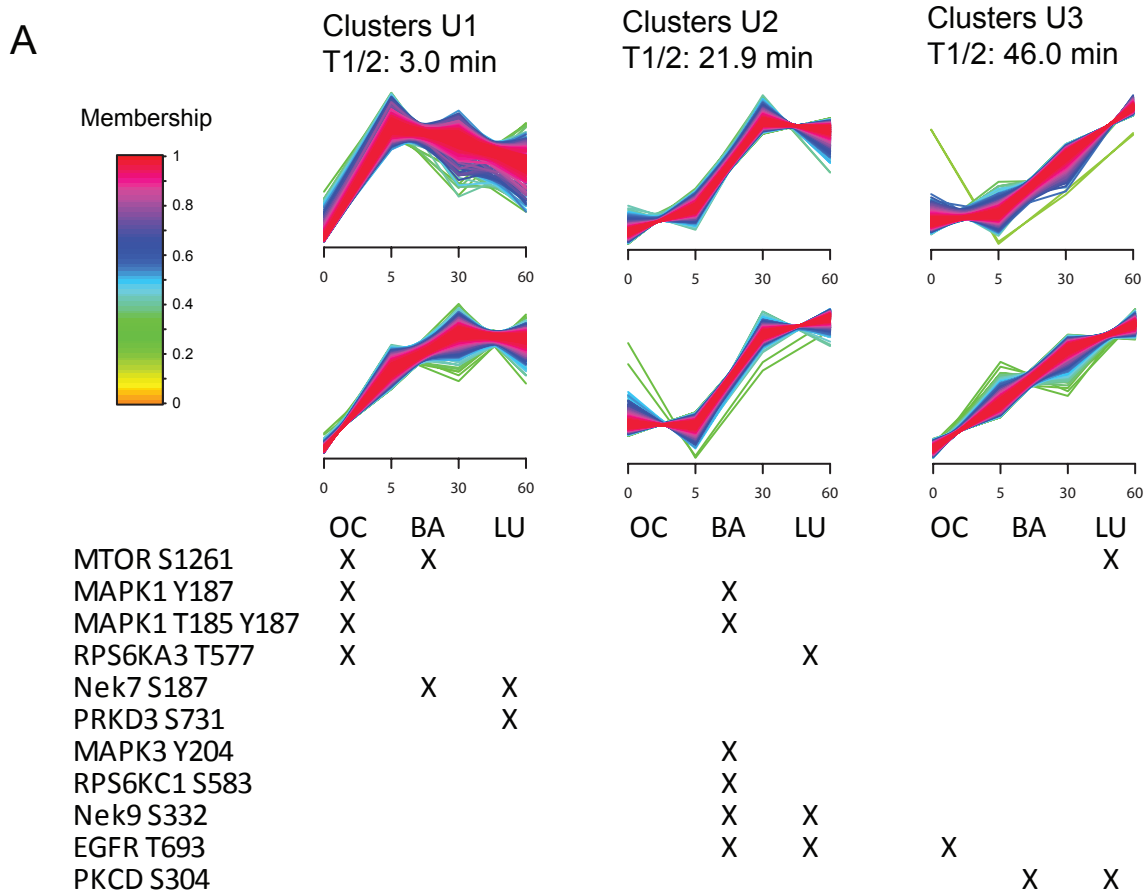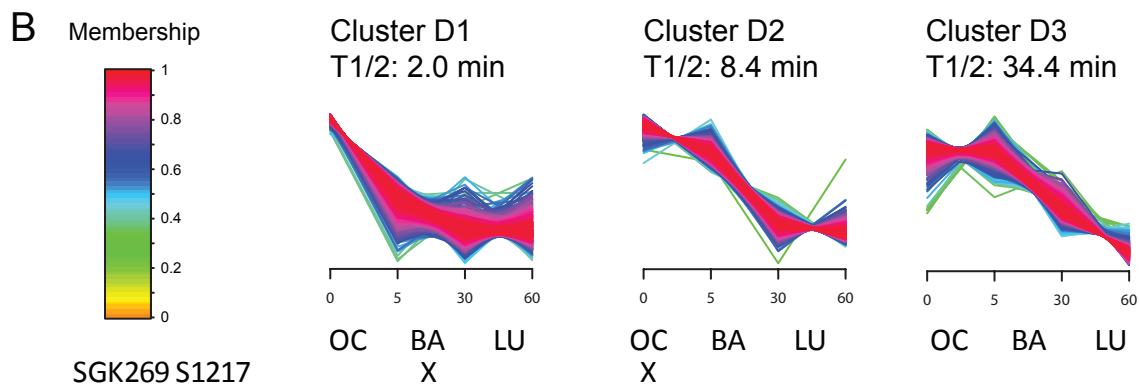

**Figure S3:**

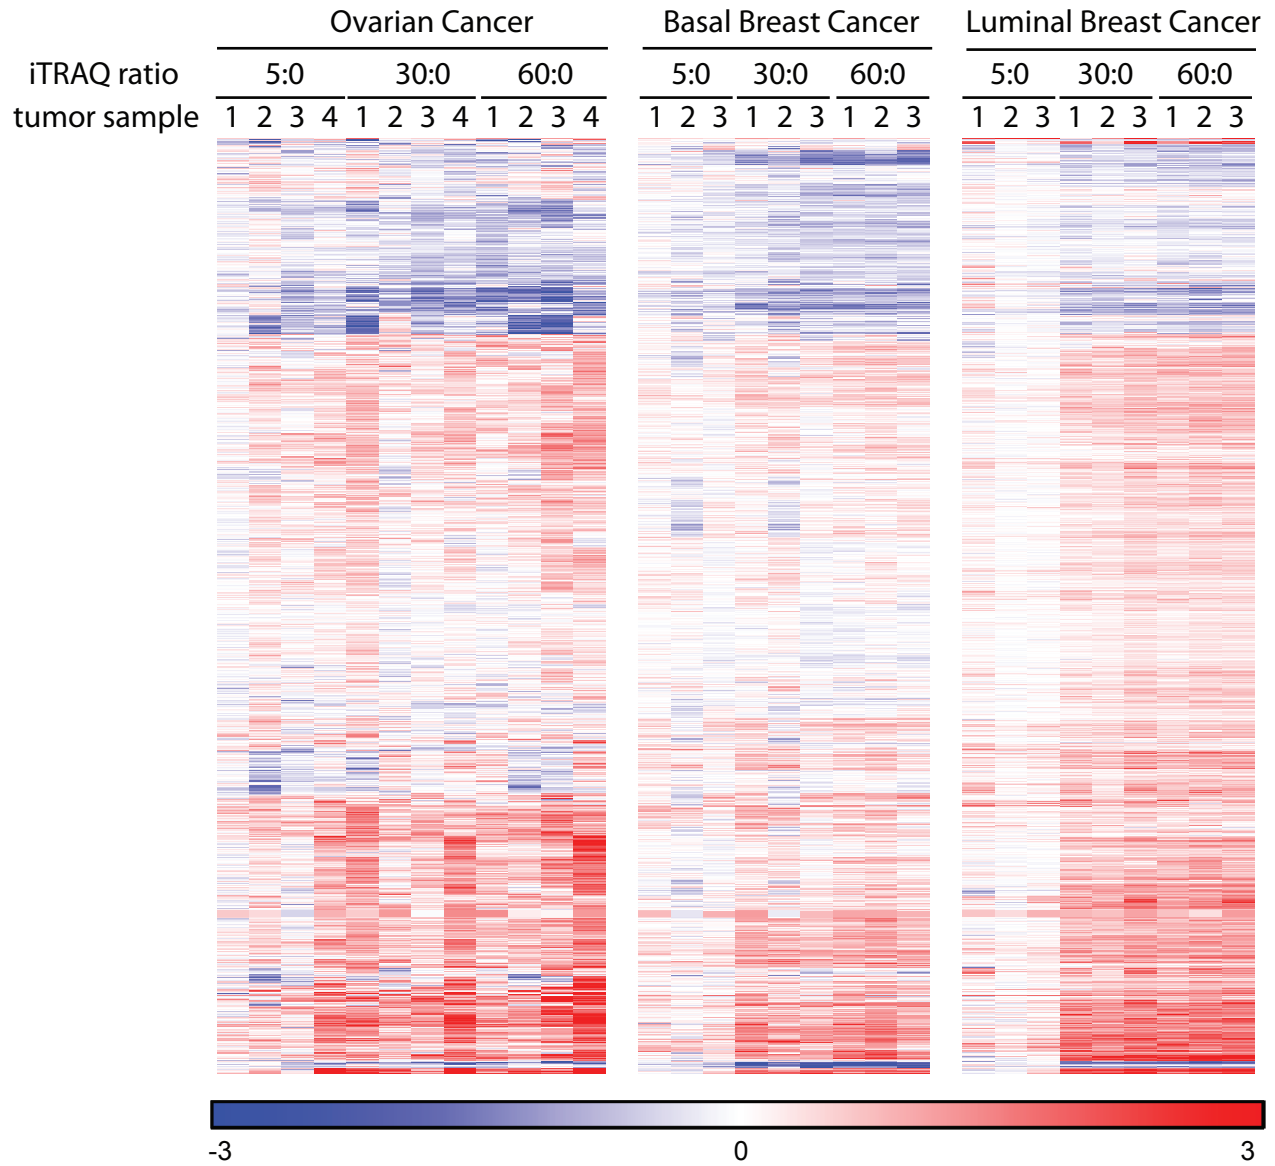

**Figure S4:**

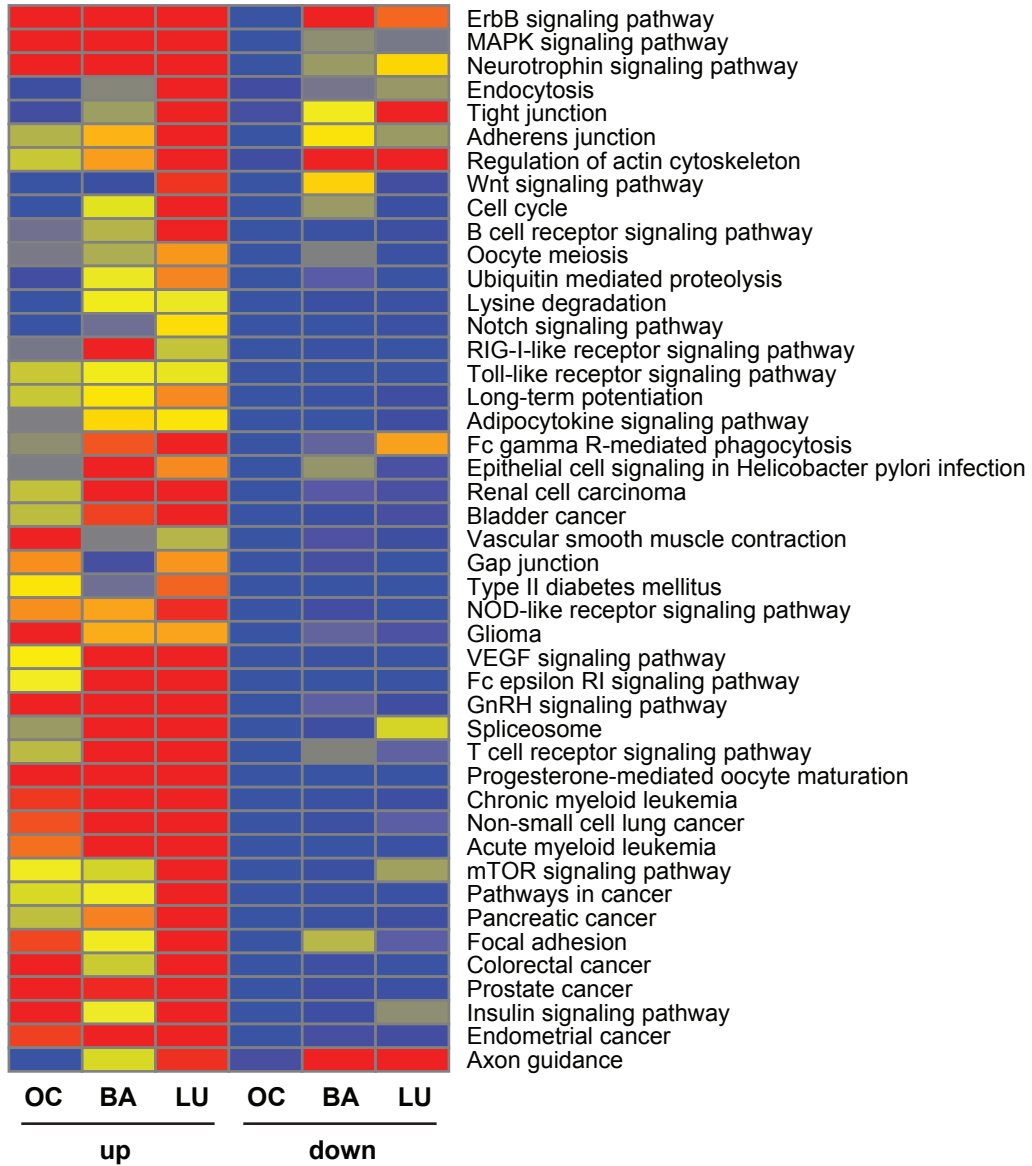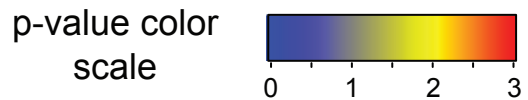



# Figure S5:

## JNK & p38 MAP kinase pathway

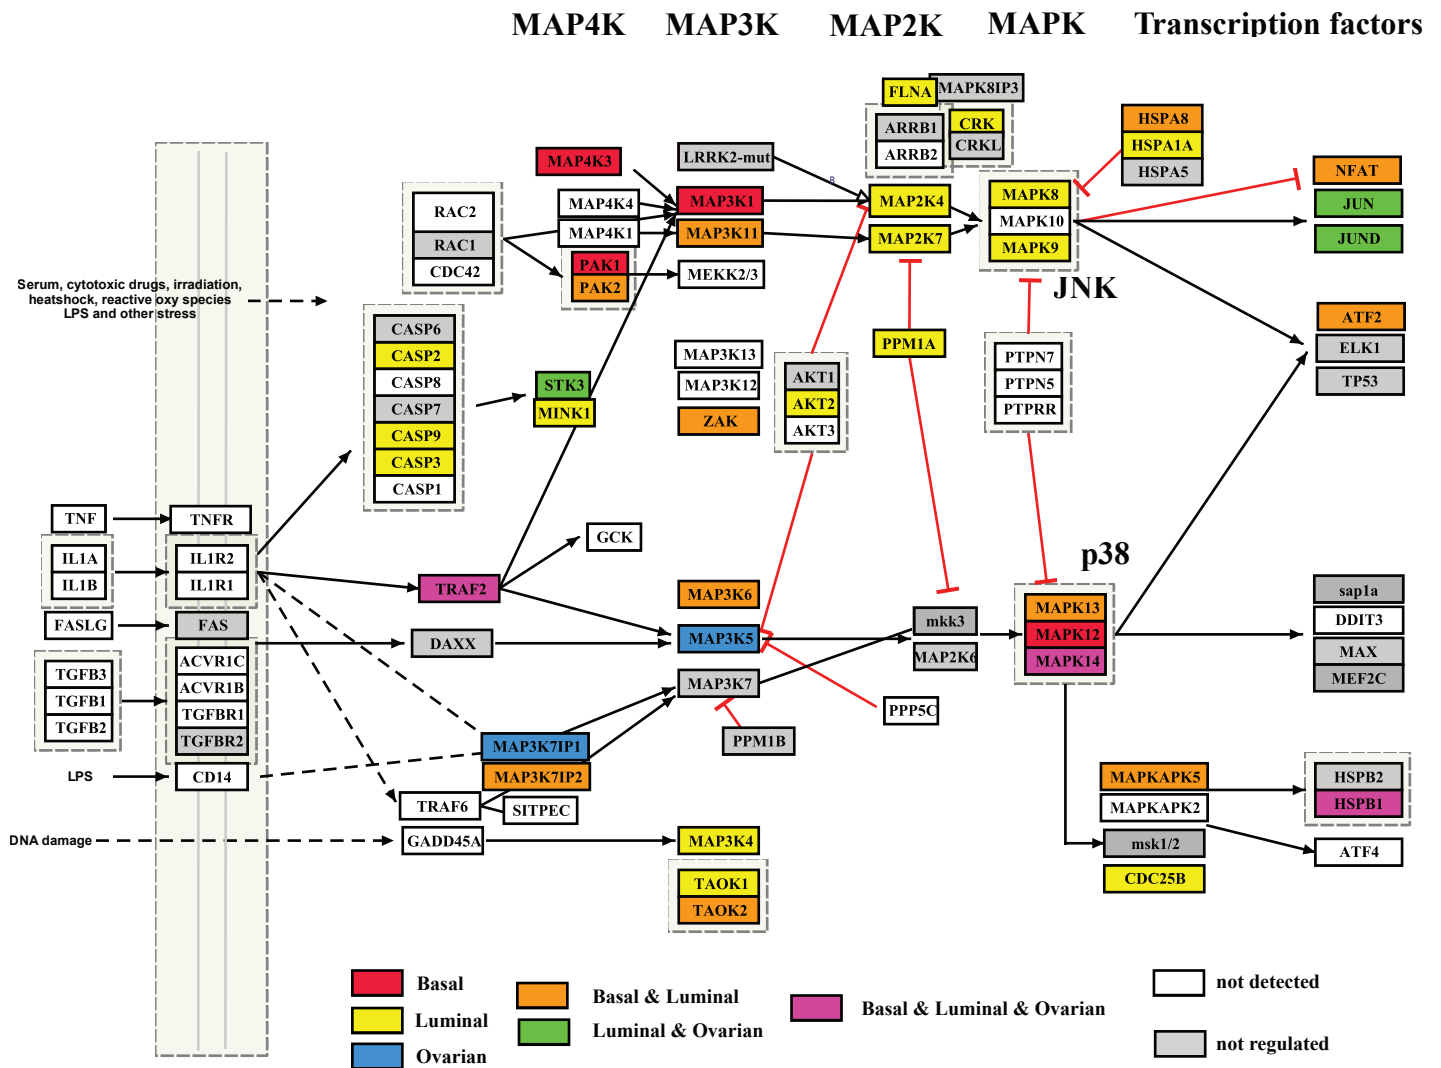

Figure S6:

Ovarian Cancer

Basal-like Breast Cancer

Luminal Breast Cancer

iTRAQ Log2 time point ratios

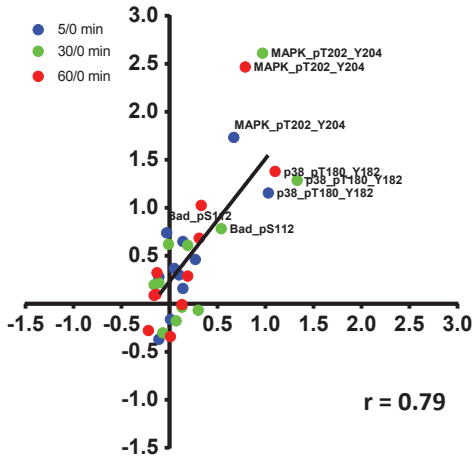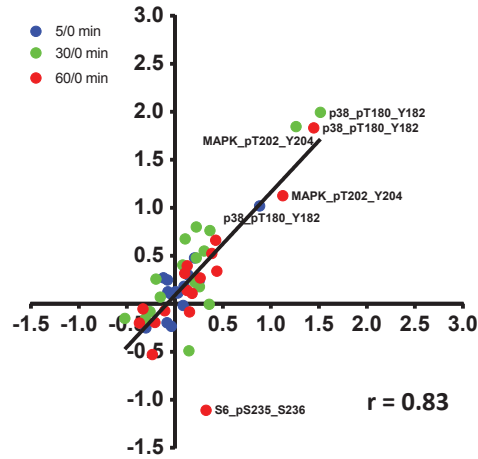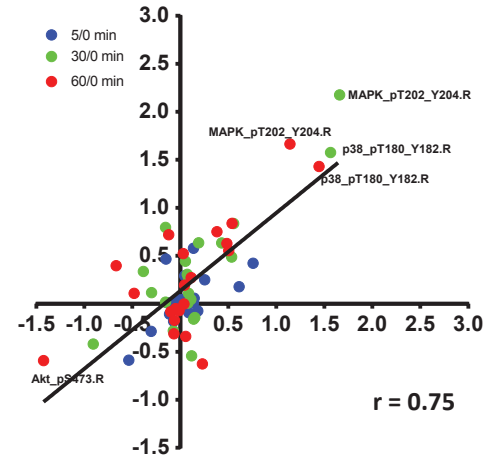

RPPA Log2 time point ratios

# Figure S7:

| GI-number | Protein name                                                 | Gene name | Phosphosite | Sequence |
|-----------|--------------------------------------------------------------|-----------|-------------|----------|
| 87299628  | Biorientation of chromosomes in cell division protein 1-like | BOD1L     | S800        | KLsVLGK  |

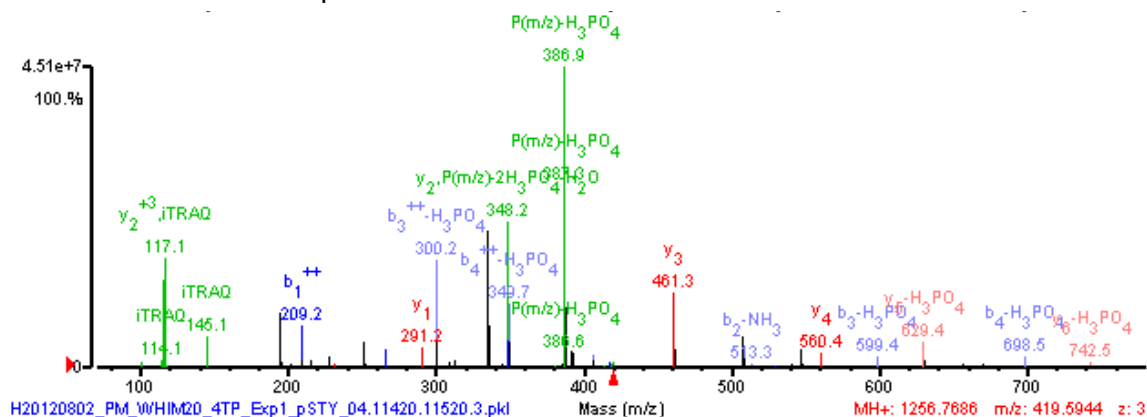

| GI-number | Protein name              | Gene name | Phosphosite | Sequence |
|-----------|---------------------------|-----------|-------------|----------|
| 4504517   | Heat shock protein beta-1 | HSPBL2    | S15         | GPswDPFR |

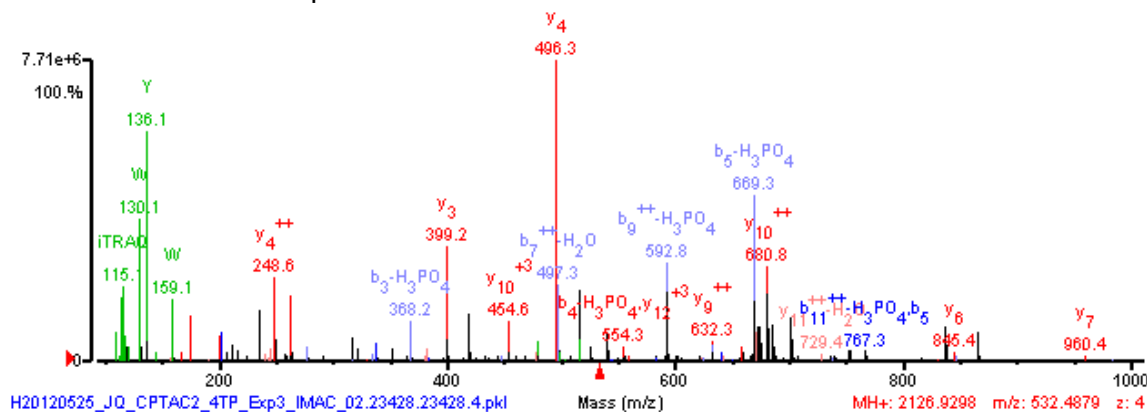

| GI-number | Protein name                                        | Gene name | Phosphosite | Sequence       |
|-----------|-----------------------------------------------------|-----------|-------------|----------------|
| 61743954  | Neuroblast differentiation-associated protein AHNAK | AHNAK     | S3426       | VSMpDVELNLKsPK |

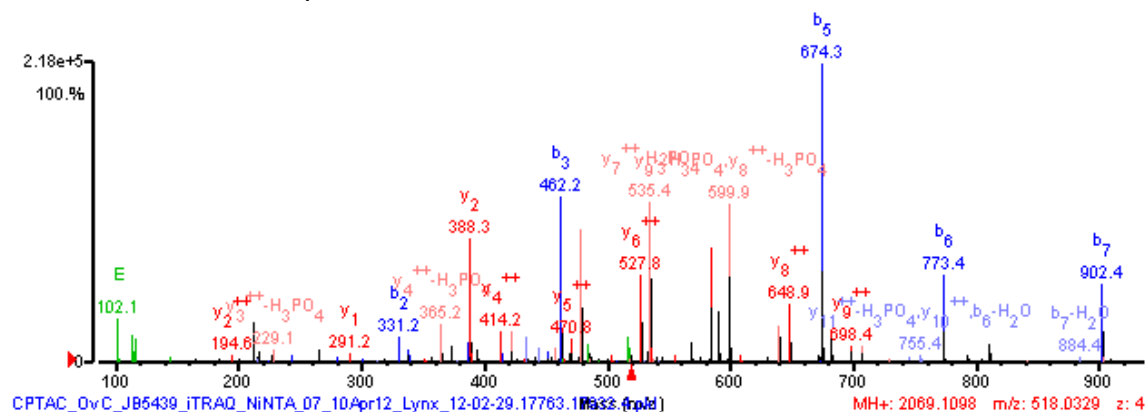

| GI-number | Protein name                           | Gene name | Phosphosite | Sequence       |
|-----------|----------------------------------------|-----------|-------------|----------------|
| 48255933  | Non-histone chromosomal protein HMG-14 | HMGN1     | S7          | RKVSAEGAAKEEPK |

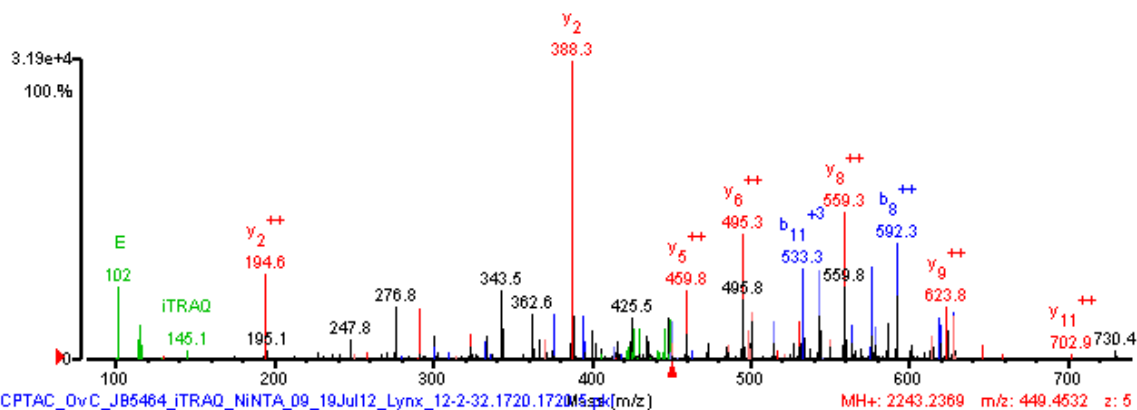

| GI-number | Protein name                           | Gene name | Phosphosite | Sequence        |
|-----------|----------------------------------------|-----------|-------------|-----------------|
| 192807323 | Transcription activator BRG1 isoform A | SMARCA4   | S1382       | EVDYSDsLTEKQWLK |

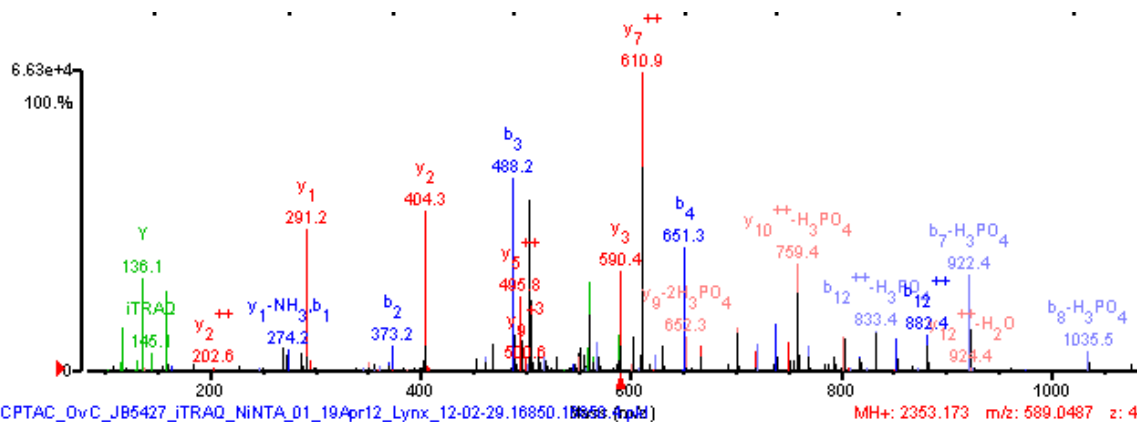

| GI-number | Protein name  | Gene name | Phosphosite | Sequence    |
|-----------|---------------|-----------|-------------|-------------|
| 223555917 | Protein LYRIC | MTDH      | S298        | LSSQIsAGEEK |

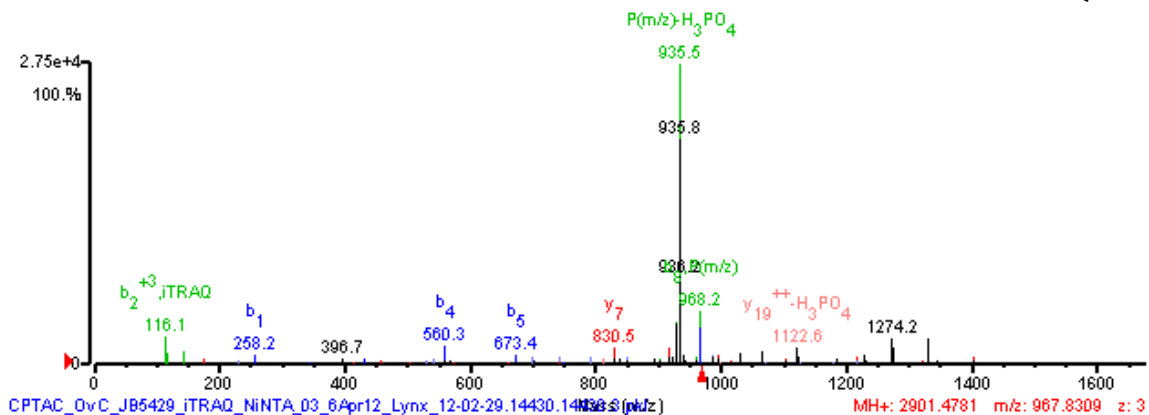

| GI-number | Protein name                             | Gene name | Phosphosite | Sequence  |
|-----------|------------------------------------------|-----------|-------------|-----------|
| 5032179   | Transcription intermediary factor 1-beta | TRIM28    | S489        | KVPRVSLER |

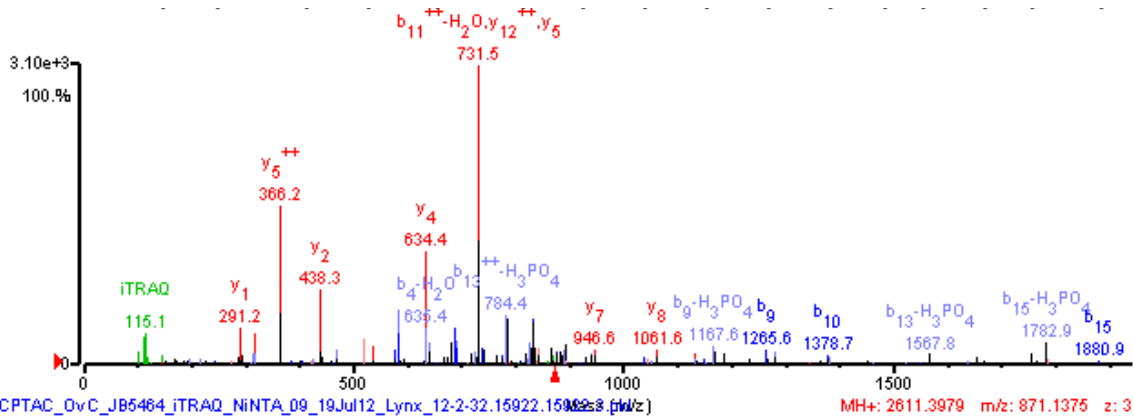

| GI-number | Protein name                                | Gene name | Phosphosite | Sequence     |
|-----------|---------------------------------------------|-----------|-------------|--------------|
| 14670350  | General transcription factor II-I isoform 1 | GTF2I     | S722        | GREFsFEAWNAK |

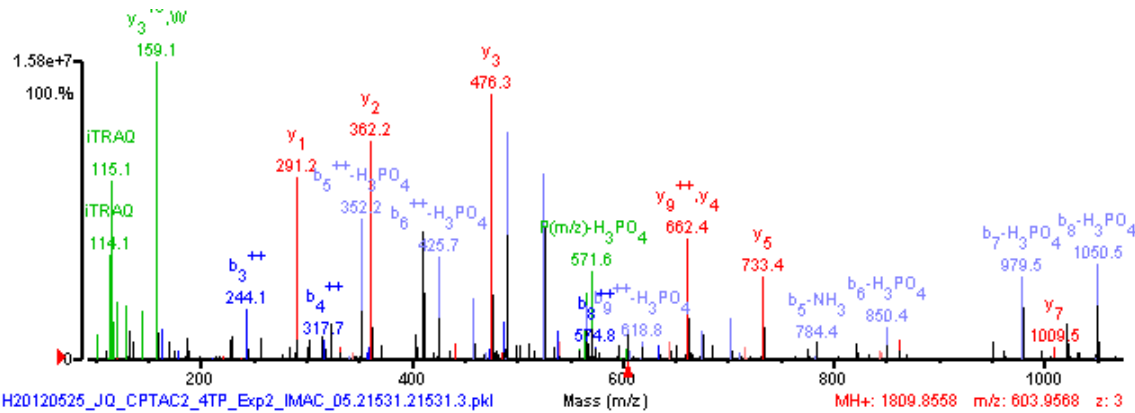

| GI-number | Protein name                                                      | Gene name | Phosphosite | Sequence    |
|-----------|-------------------------------------------------------------------|-----------|-------------|-------------|
| 259906018 | Apoptotic chromatin condensation inducer in the nucleus isoform 2 | ACIN1     | S864        | KPSIITTESLK |

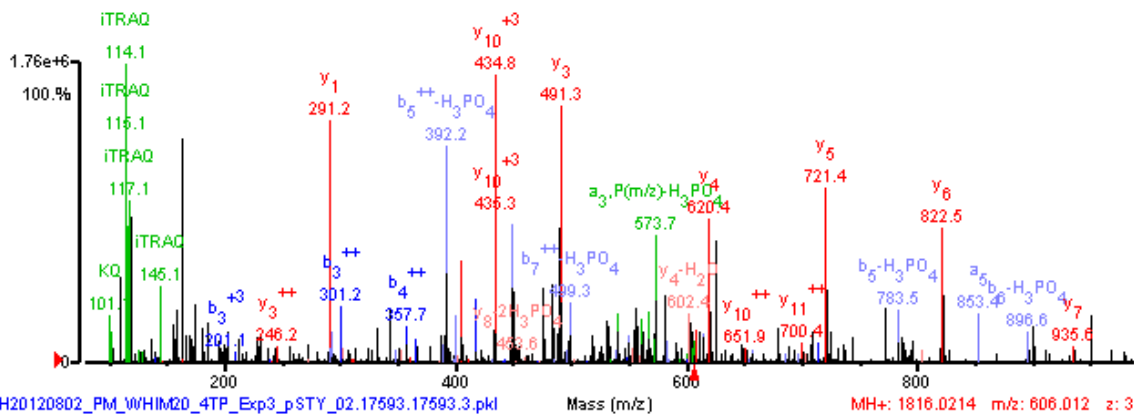

| GI-number | Protein name                      | Gene name | Phosphosite | Sequence                                |
|-----------|-----------------------------------|-----------|-------------|-----------------------------------------|
| 37577122  | Ubiquitin-conjugating enzyme E2J1 | UBE2J1    | S184        | QI <sup>s</sup> FKAEVN <sup>s</sup> SGK |

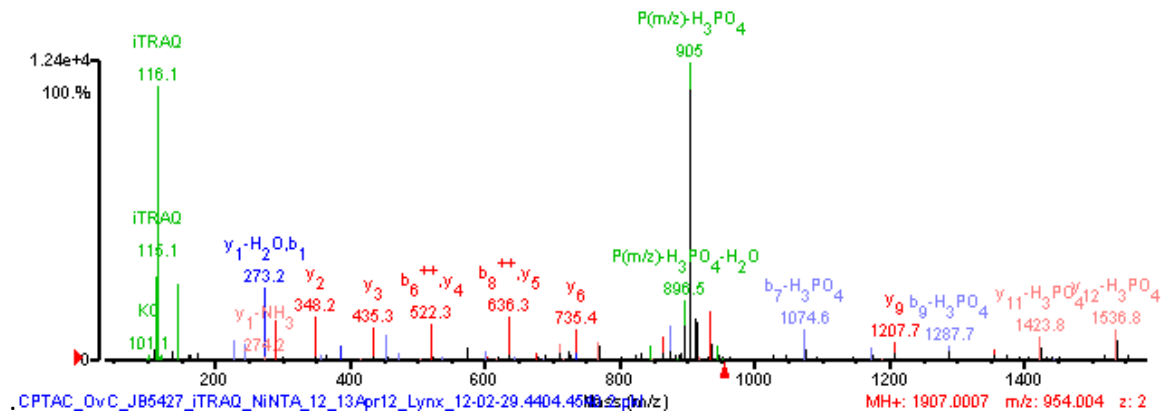

| GI-number | Protein name                      | Gene name | Phosphosite | Sequence                                |
|-----------|-----------------------------------|-----------|-------------|-----------------------------------------|
| 20357552  | Src substrate cortactin isoform a | CTTN      | S432        | AEL <sup>s</sup> YRGPVSGTEPEPVYSMEAADYR |

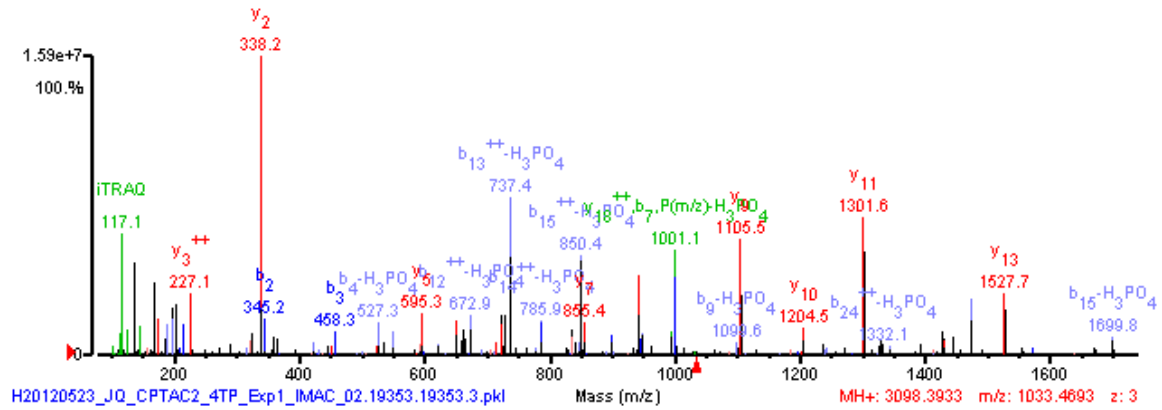

| GI-number | Protein name                   | Gene name | Phosphosite | Sequence             |
|-----------|--------------------------------|-----------|-------------|----------------------|
| 38372909  | Lysine-specific demethylase 3B | KDM3B     | S798        | RF <sup>s</sup> LDER |

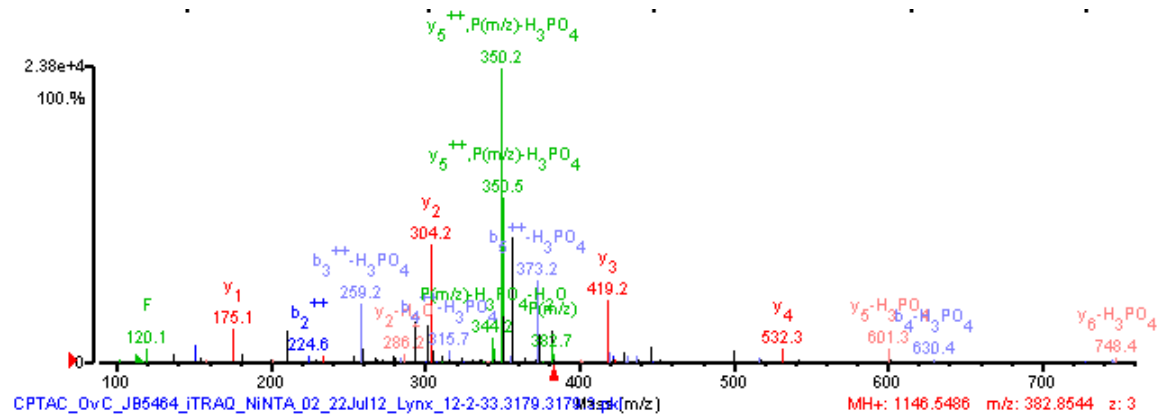

| GI-number | Protein name                                | Gene name | Phosphosite | Sequence      |
|-----------|---------------------------------------------|-----------|-------------|---------------|
| 14670350  | General transcription factor II-I isoform 1 | GTF2I     | S103        | MsVDAVEIETLRK |

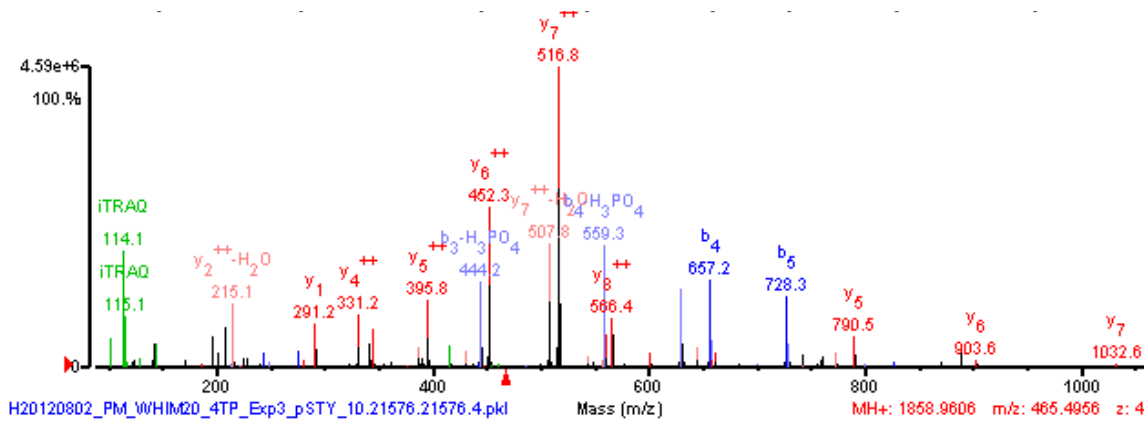

| GI-number | Protein name                     | Gene name | Phosphosite | Sequence     |
|-----------|----------------------------------|-----------|-------------|--------------|
| 82659109  | E3 ubiquitin-protein ligase UBR4 | UBR4      | S1760       | HAsTSSPADKAK |

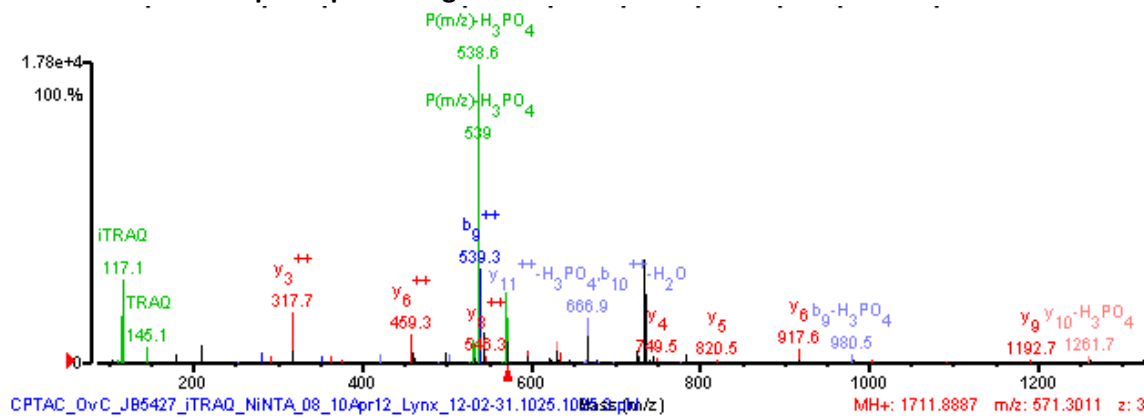

| GI-number | Protein name             | Gene name | Phosphosite | Sequence |
|-----------|--------------------------|-----------|-------------|----------|
| 193083183 | Synaptopodin-2 isoform a | SYNPO2    | S1091       | SLsLPGR  |

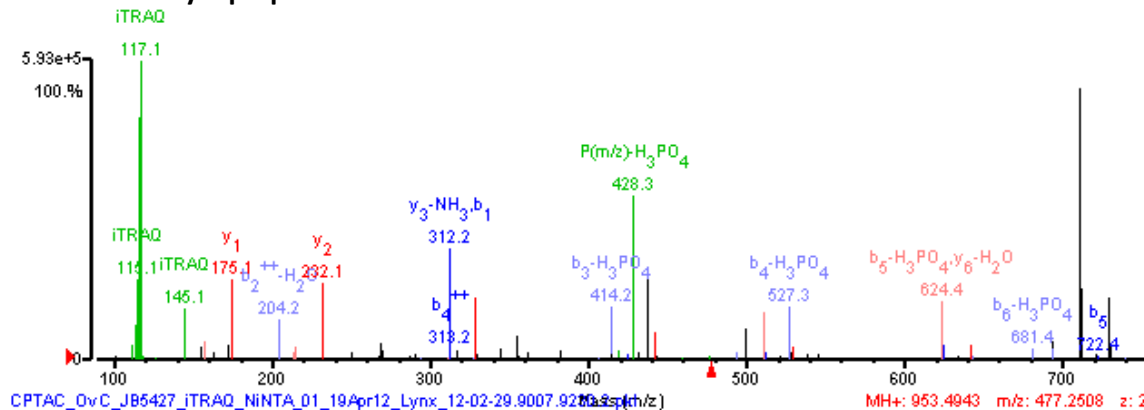

| GI-number | Protein name                                   | Gene name | Phosphosite | Sequence       |
|-----------|------------------------------------------------|-----------|-------------|----------------|
| 114842410 | Zinc finger CCCH domain-containing protein 11A | ZC3H11A   | S290        | RKFSAGGSDPPLKR |

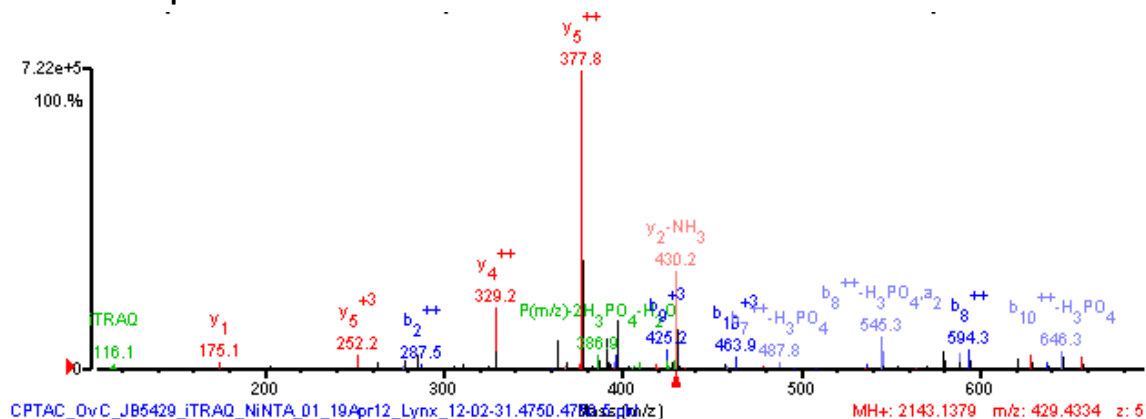

| GI-number | Protein name          | Gene name | Phosphosite | Sequence   |
|-----------|-----------------------|-----------|-------------|------------|
| 9994185   | RNA-binding protein 7 | RBM7      | S204        | MNSYPYLADR |

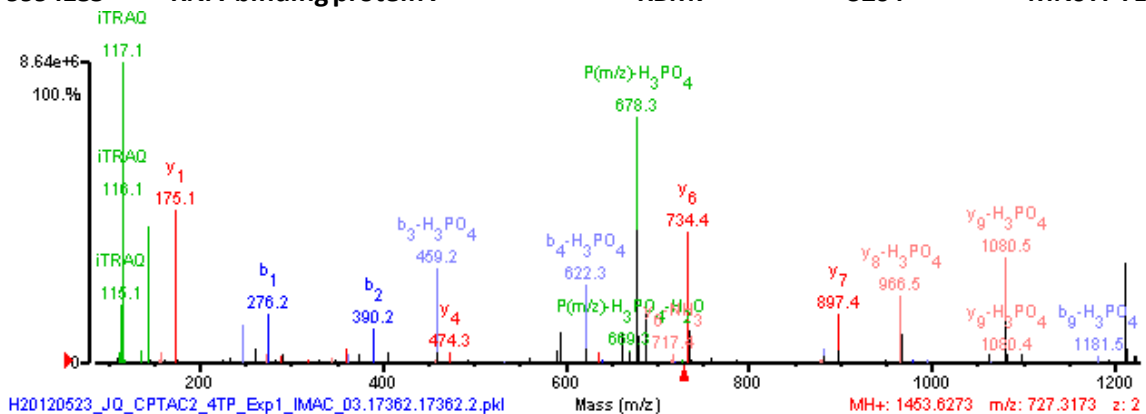

| GI-number | Protein name                  | Gene name | Phosphosite | Sequence  |
|-----------|-------------------------------|-----------|-------------|-----------|
| 40556376  | Putative oxidoreductase GLYR1 | GLYR1     | S130        | RKLSLSEGK |

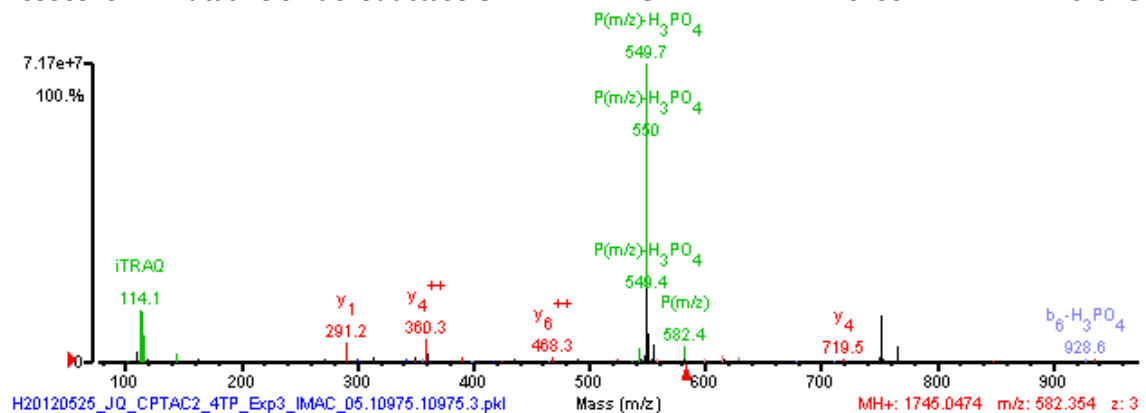



| GI-number | Protein name            | Gene name | Phosphosite | Sequence                  |
|-----------|-------------------------|-----------|-------------|---------------------------|
| 281182404 | Gamma-taxilin isoform 1 | CXORF15   | S105        | NLVSPAYCT*QE*s*REEIPGGEAR |

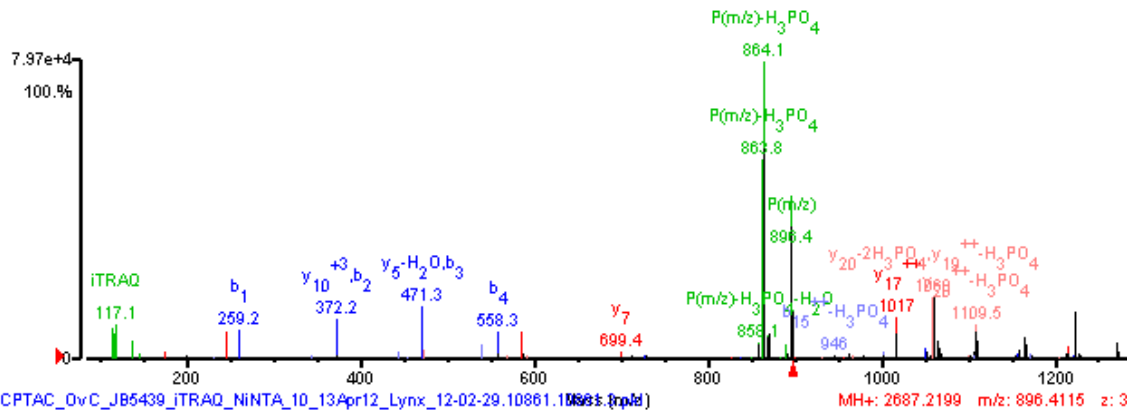

| GI-number | Protein name                                           | Gene name | Phosphosite | Sequence      |
|-----------|--------------------------------------------------------|-----------|-------------|---------------|
| 4507691   | Transformation/transcription domain-associated protein | TRRAP     | S2033       | RGLsVDSAQEVKR |

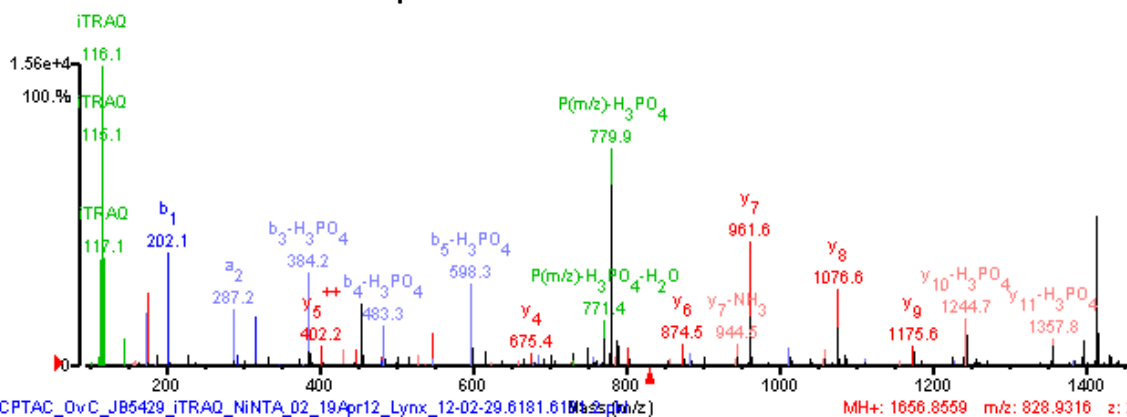

| GI-number | Protein name                  | Gene name | Phosphosite | Sequence  |
|-----------|-------------------------------|-----------|-------------|-----------|
| 41281917  | Protein polybromo-1 isoform 4 | PBRM1     | S948        | TYsQDCFSK |

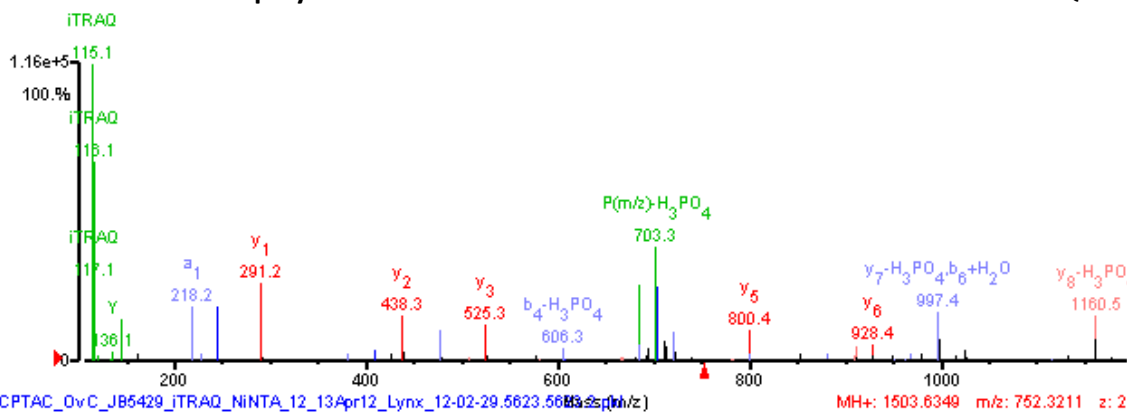

| GI-number | Protein name | Gene name | Phosphosite | Sequence     |
|-----------|--------------|-----------|-------------|--------------|
| 33356174  | Pinin        | PNN       | S66         | RGFsDSGGPPAK |

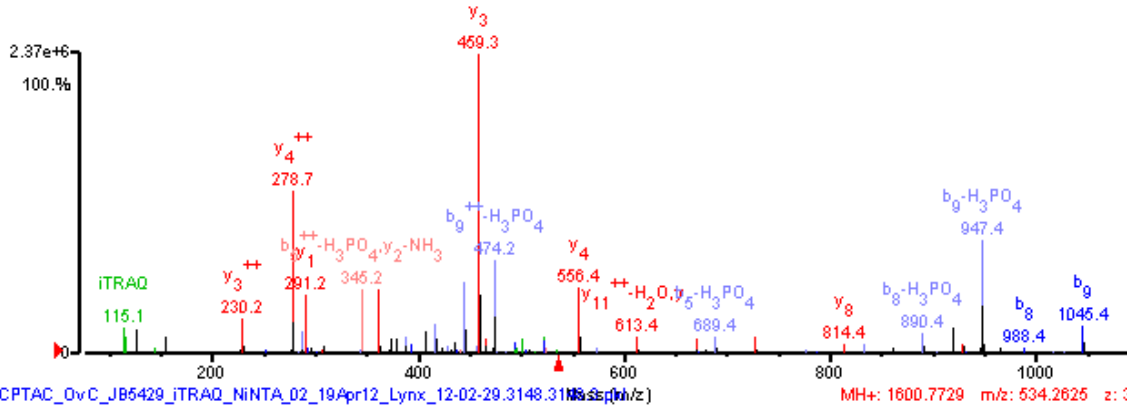

| GI-number | Protein name                          | Gene name | Phosphosite | Sequence               |
|-----------|---------------------------------------|-----------|-------------|------------------------|
| 4502193   | Serine/threonine-protein kinase A-Raf | ARAF      | T181 S186   | QHEAPSNRPLNELLtPQGPpPR |

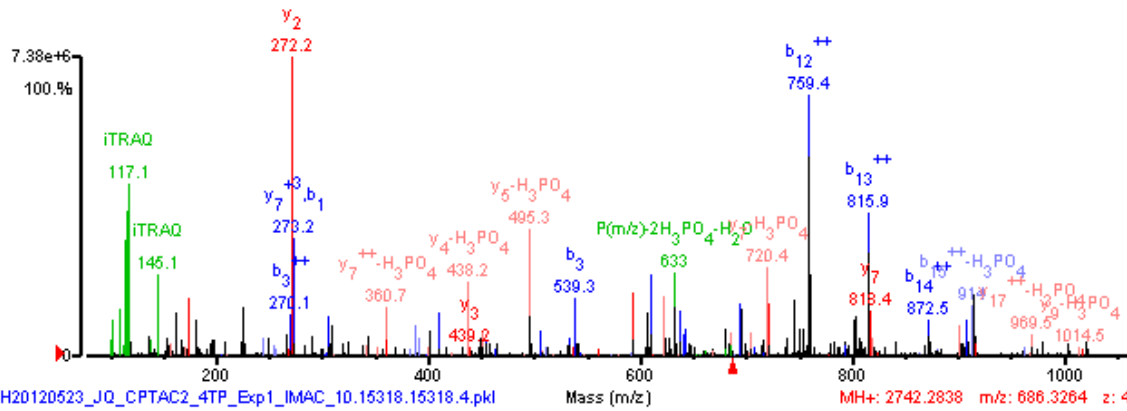

| GI-number | Protein name            | Gene name | Phosphosite | Sequence |
|-----------|-------------------------|-----------|-------------|----------|
| 112421108 | Protein capicua homolog | CIC       | S1389       | AILGSYR  |

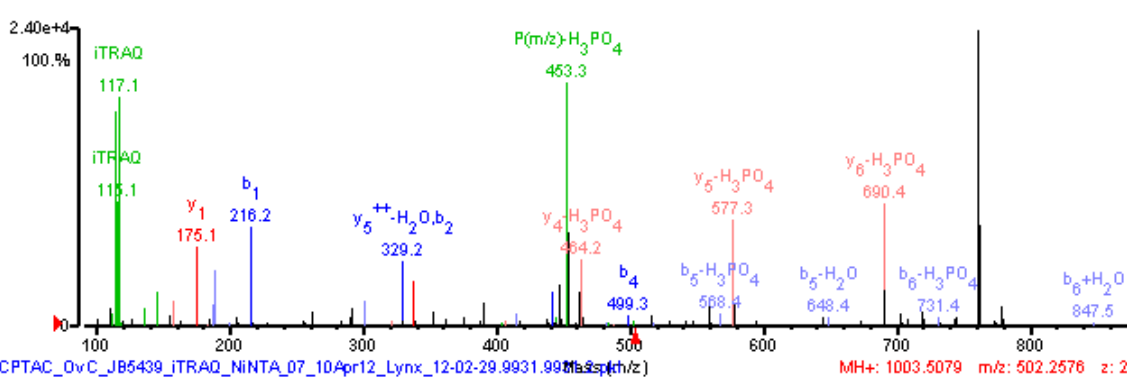

| GI-number | Protein name            | Gene name | Phosphosite | Sequence          |
|-----------|-------------------------|-----------|-------------|-------------------|
| 21626468  | Zinc finger protein 638 | ZNF638    | S383        | NYQSQADIPRSPFGIVK |

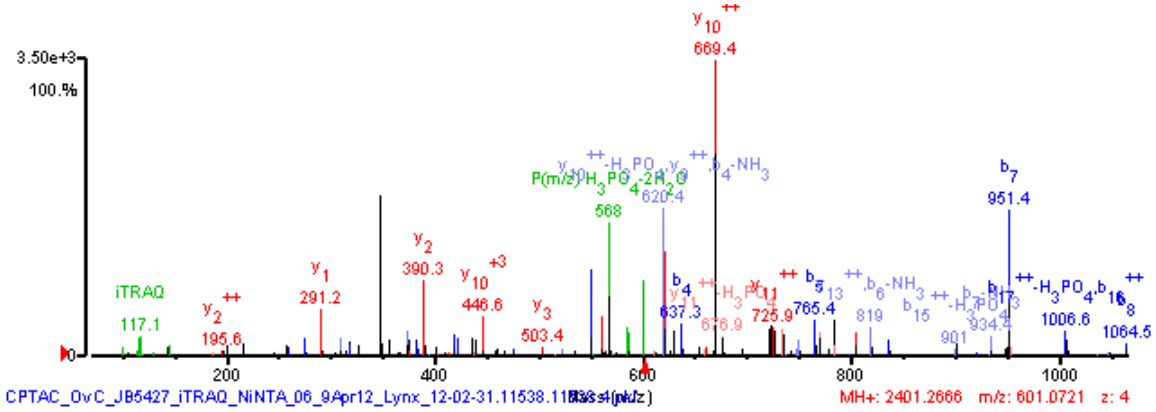

| GI-number | Protein name                                        | Gene name | Phosphosite | Sequence                  |
|-----------|-----------------------------------------------------|-----------|-------------|---------------------------|
| 61743954  | Neuroblast differentiation-associated protein AHNAK | AHNAK     | S3411       | FKMPFLSI <sup>P</sup> SPK |

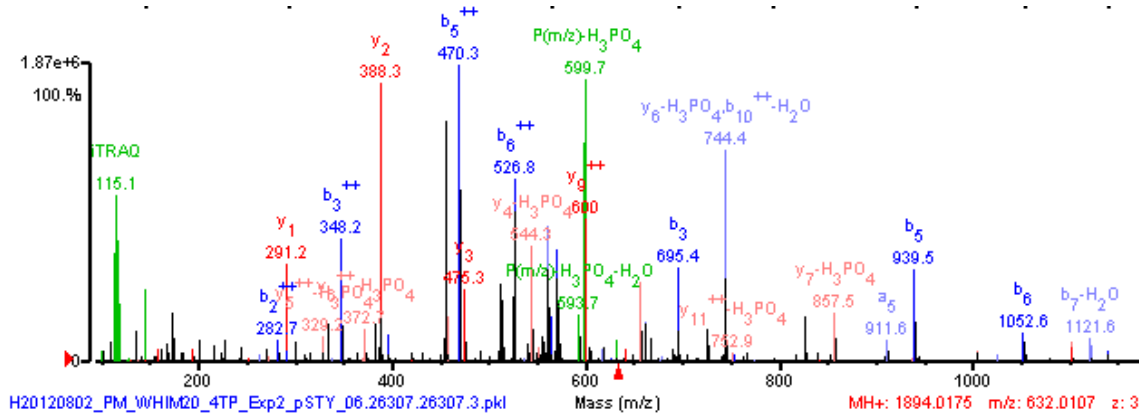

| GI-number | Protein name          | Gene name | Phosphosite | Sequence   |
|-----------|-----------------------|-----------|-------------|------------|
| 9994185   | RNA-binding protein 7 | RBM7      | S136        | SFsSPENFQR |

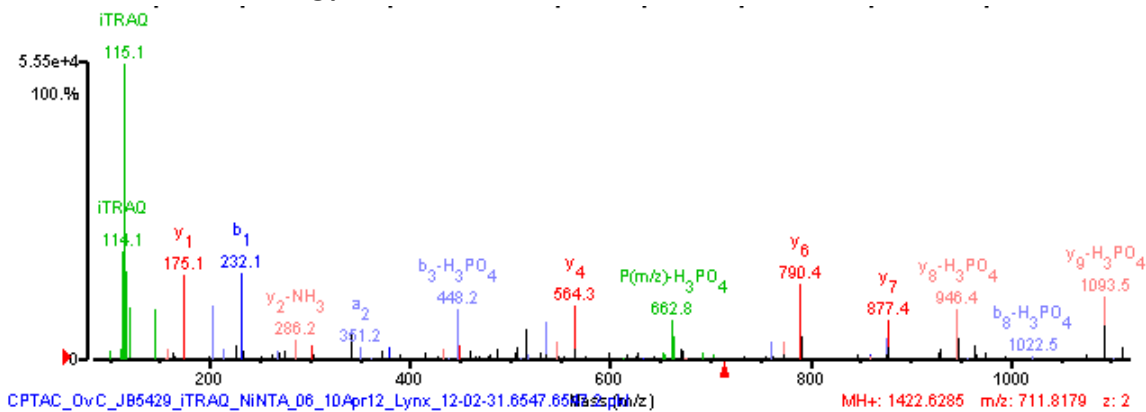

| GI-number | Protein name           | Gene name | Phosphosite | Sequence    |
|-----------|------------------------|-----------|-------------|-------------|
| 34996489  | PH-interacting protein | PHIP      | S1315       | AQsYDIQAWKK |

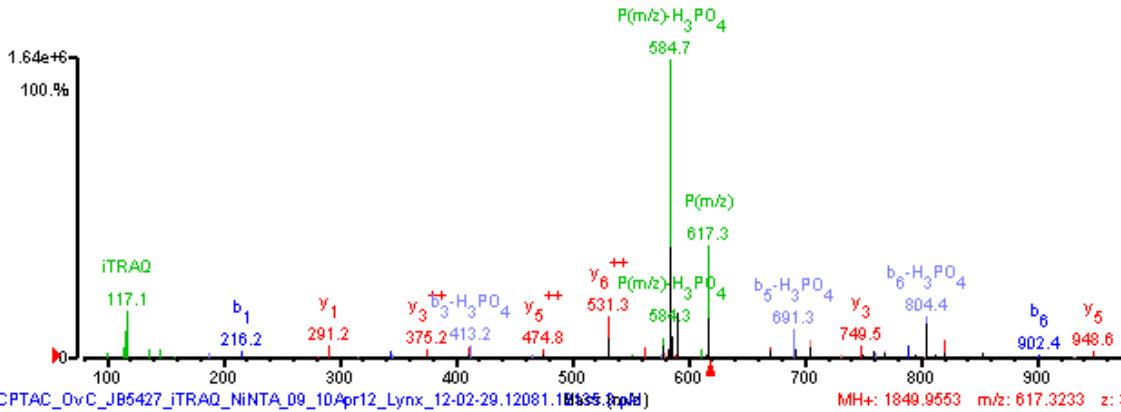

| GI-number | Protein name                        | Gene name | Phosphosite | Sequence    |
|-----------|-------------------------------------|-----------|-------------|-------------|
| 5174545   | Myocyte-specific enhancer factor 2D | MEF2D     | S121        | RASeELDGLFR |

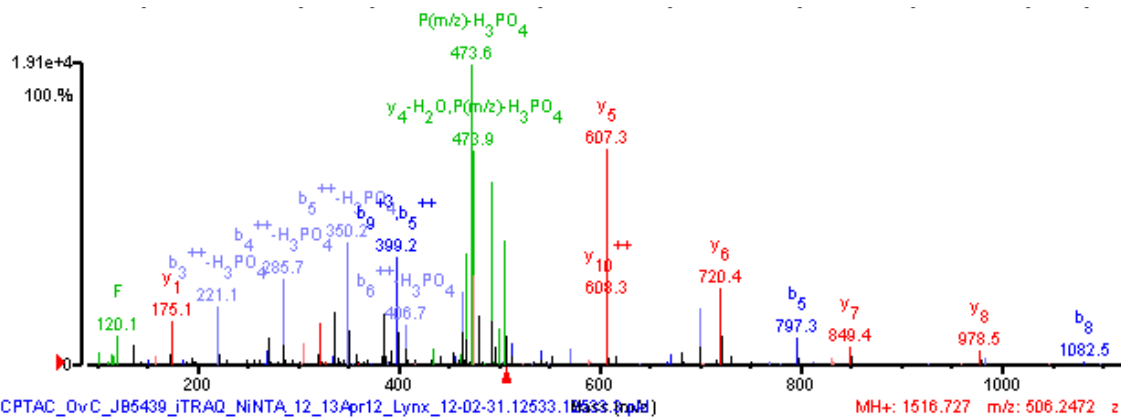

| GI-number | Protein name                                    | Gene name | Phosphosite | Sequence               |
|-----------|-------------------------------------------------|-----------|-------------|------------------------|
| 28872725  | 26S proteasome non-ATPase regulatory subunit 11 | PSMD11    | S14         | AQsLLSTDREASIDILHSIVKR |

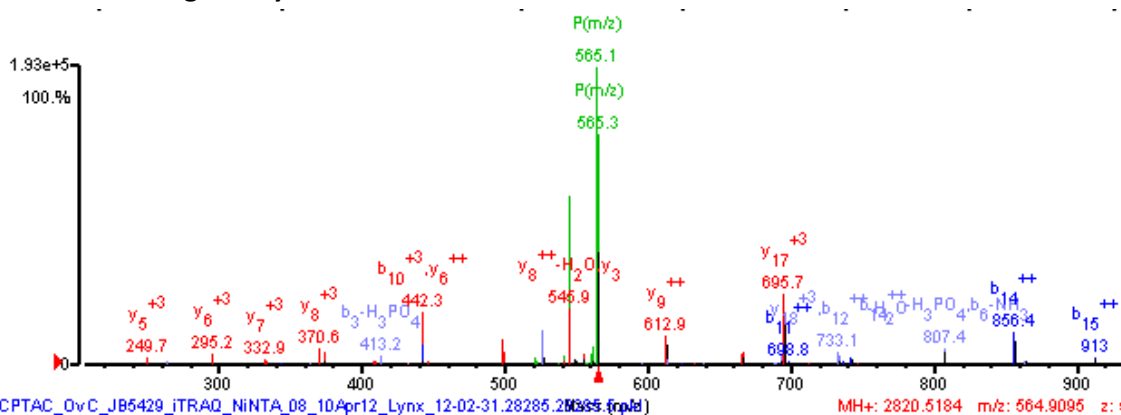

| GI-number | Protein name                                  | Gene name | Phosphosite | Sequence      |
|-----------|-----------------------------------------------|-----------|-------------|---------------|
| 20986514  | Mitogen-activated protein kinase 14 isoform 3 | MAPK14    | Y182        | HTDDEmTGyVATR |

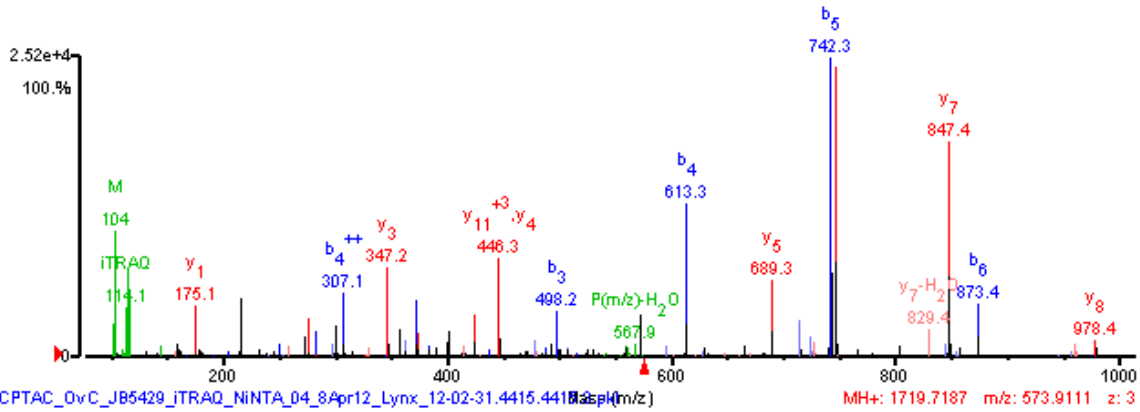

| GI-number | Protein name                                                      | Gene name | Phosphosite | Sequence   |
|-----------|-------------------------------------------------------------------|-----------|-------------|------------|
| 7662238   | Apoptotic chromatin condensation inducer in the nucleus isoform 1 | ACIN1     | S825        | KIsVVSTATK |

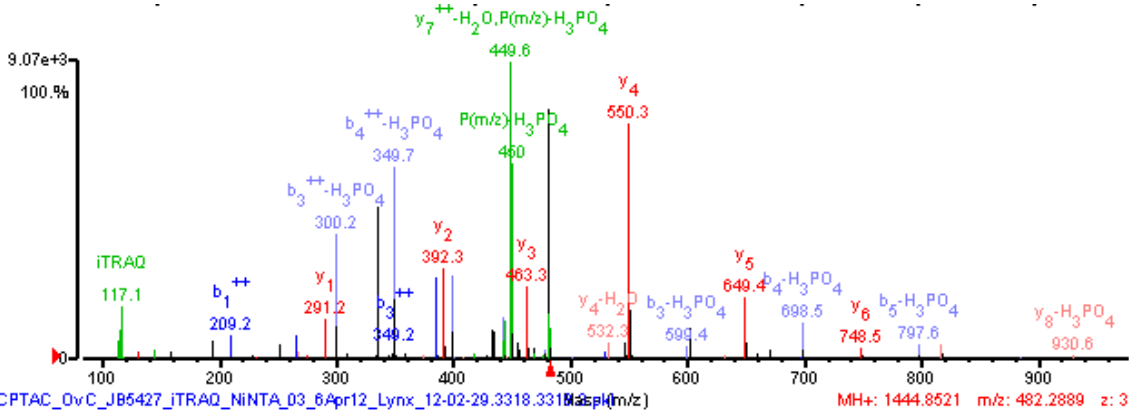

| GI-number | Protein name | Gene name | Phosphosite | Sequence             |
|-----------|--------------|-----------|-------------|----------------------|
| 65288071  | Tensin-3     | TNS3      | S1154       | ASEAASPLPDsPGDKLVIVK |

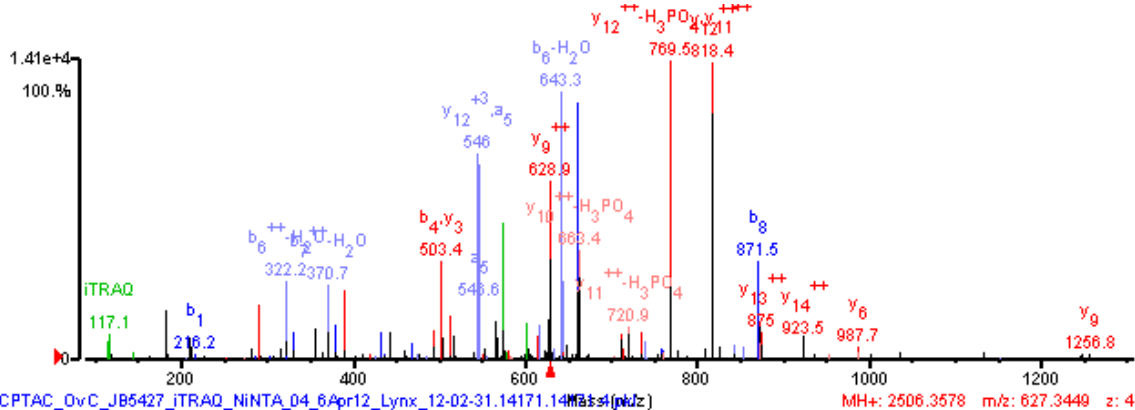

| GI-number | Protein name                 | Gene name | Phosphosite | Sequence           |
|-----------|------------------------------|-----------|-------------|--------------------|
| 14670268  | Negative elongation factor E | RDBP      | S51         | SLsEQPVMDTATATEQAK |

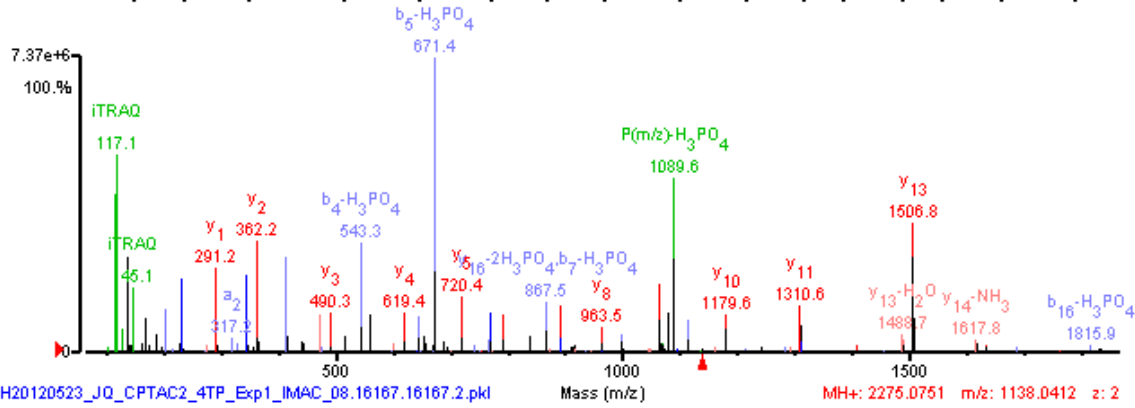

| GI-number | Protein name                      | Gene name | Phosphosite | Sequence               |
|-----------|-----------------------------------|-----------|-------------|------------------------|
| 61676188  | E3 ubiquitin-protein ligase HUWE1 | HUWE1     | S2593       | LLGPSAAADILQLsSSLPLQSR |

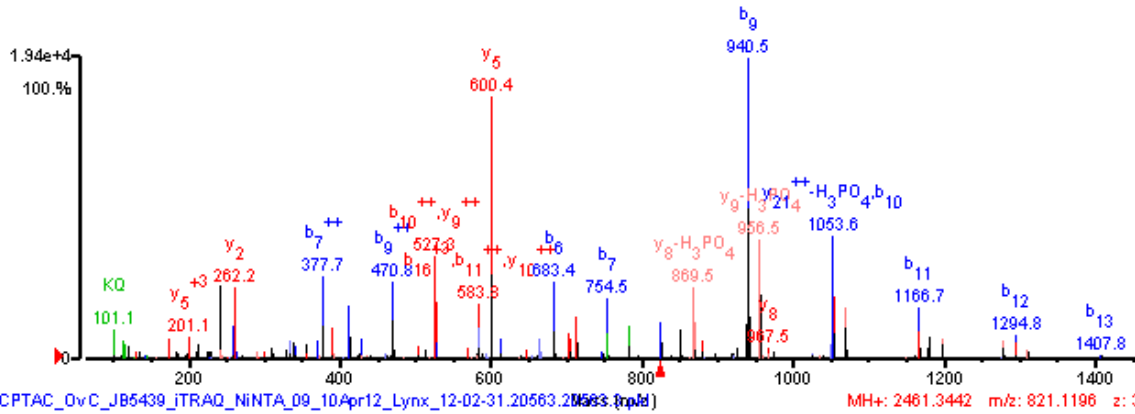

| GI-number | Protein name                                                | Gene name | Phosphosite | Sequence                  |
|-----------|-------------------------------------------------------------|-----------|-------------|---------------------------|
| 190886437 | RalBP1-associated Eps domain-containing protein 1 isoform b | REPS1     | S272 S273   | RQs*s*S*Y*DDPW<br>KITDEQR |

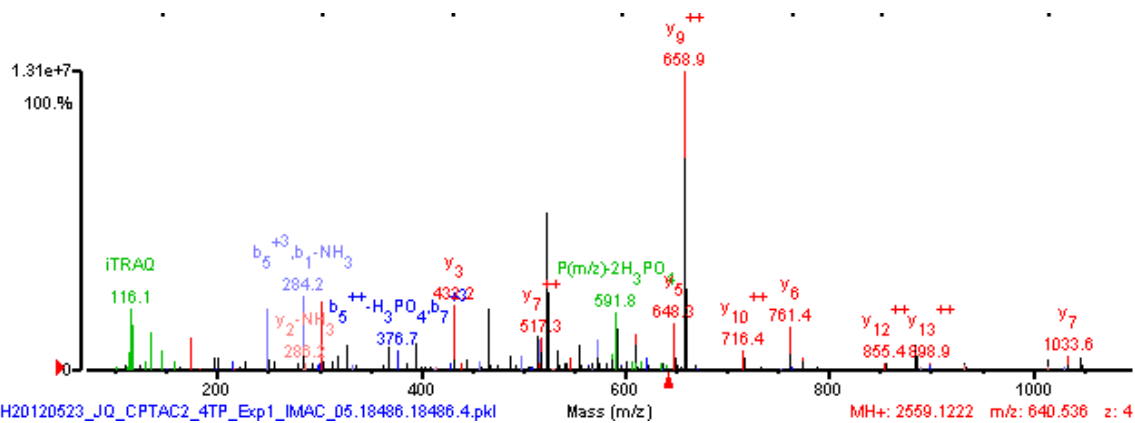

| GI-number | Protein name                     | Gene name | Phosphosite | Sequence                |
|-----------|----------------------------------|-----------|-------------|-------------------------|
| 82659109  | E3 ubiquitin-protein ligase UBR4 | UBR4      | S362        | T*Gs*TSSKEDDYESDAATIVQK |

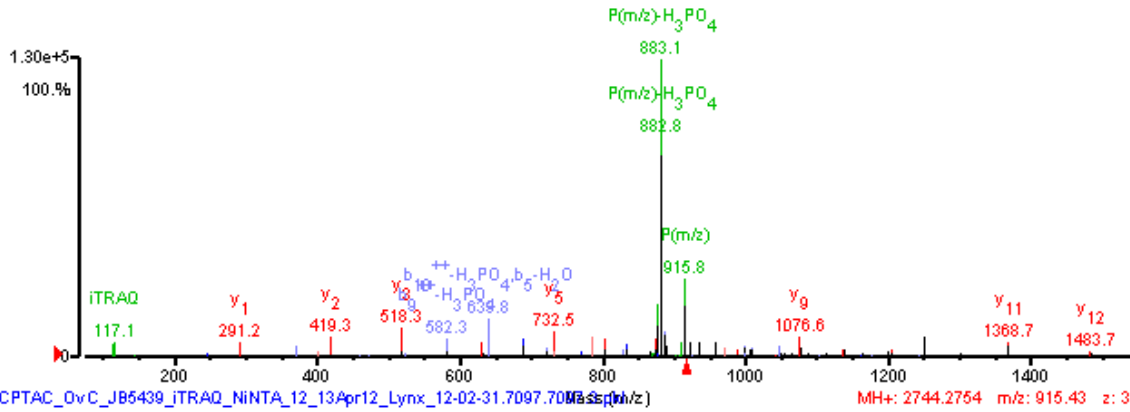

| GI-number | Protein name              | Gene name | Phosphosite | Sequence  |
|-----------|---------------------------|-----------|-------------|-----------|
| 4504517   | Heat shock protein beta-1 | HSPBL2    | S82         | QLSGVSEIR |

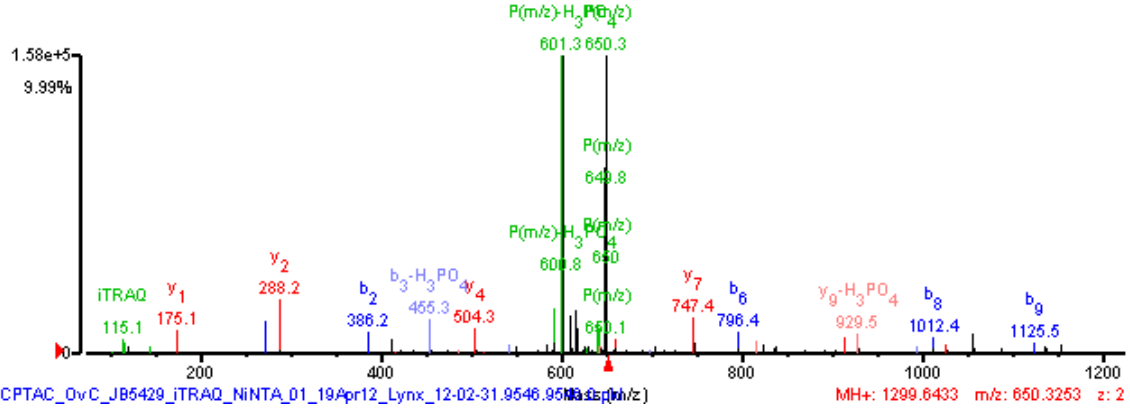

| GI-number | Protein name | Gene name | Phosphosite | Sequence |
|-----------|--------------|-----------|-------------|----------|
| 42716280  | Vigilin      | HDLBP     | S645        | ILSIQK   |

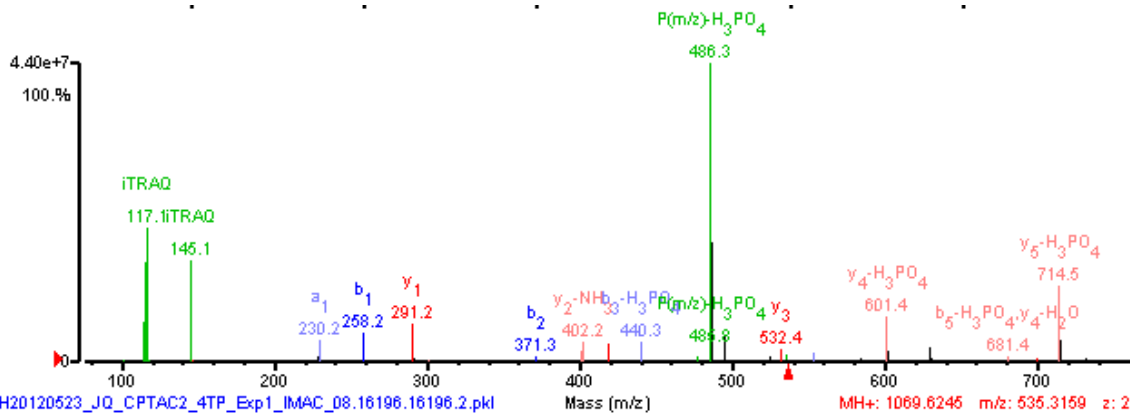

| GI-number | Protein name                                              | Gene name | Phosphosite | Sequence   |
|-----------|-----------------------------------------------------------|-----------|-------------|------------|
| 14043072  | Heterogeneous nuclear ribonucleoproteins A2/B1 isoform B1 | HNRNPA2B1 | S212        | GGNFGFGDsR |

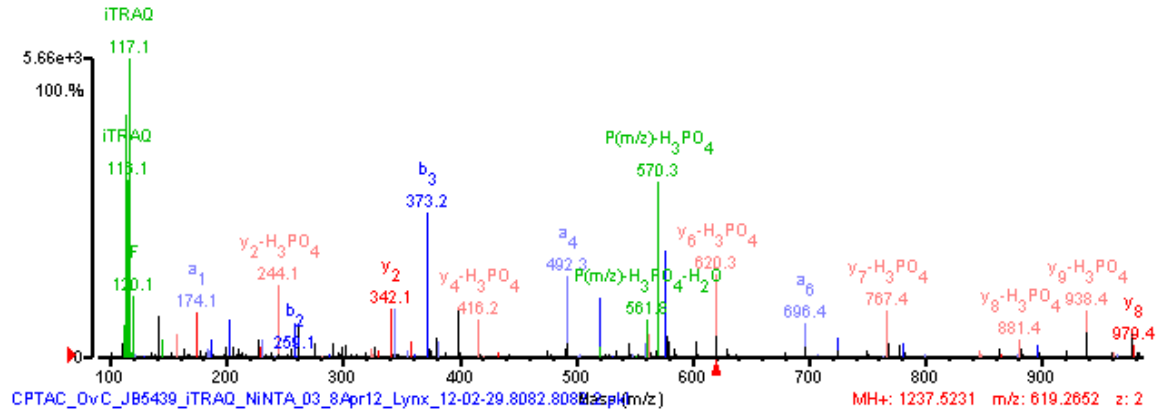

| GI-number | Protein name                | Gene name | Phosphosite | Sequence                 |
|-----------|-----------------------------|-----------|-------------|--------------------------|
| 148596984 | Golgin subfamily B member 1 | GOLGB1    | S3010       | QAsPETSASPDGSQNLVYETELLR |

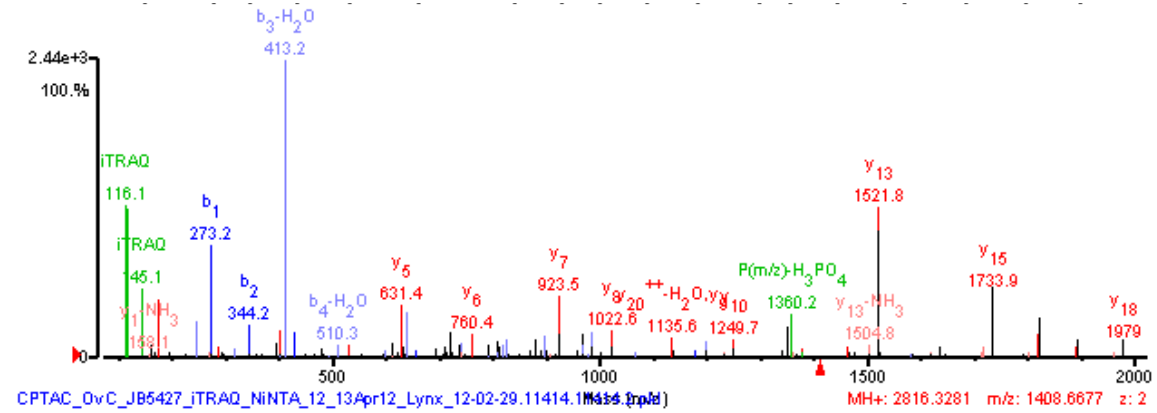

| GI-number | Protein name       | Gene name | Phosphosite | Sequence   |
|-----------|--------------------|-----------|-------------|------------|
| 51173720  | Peregrin isoform 1 | BRPF1     | T896        | Rt*S*VLFSK |

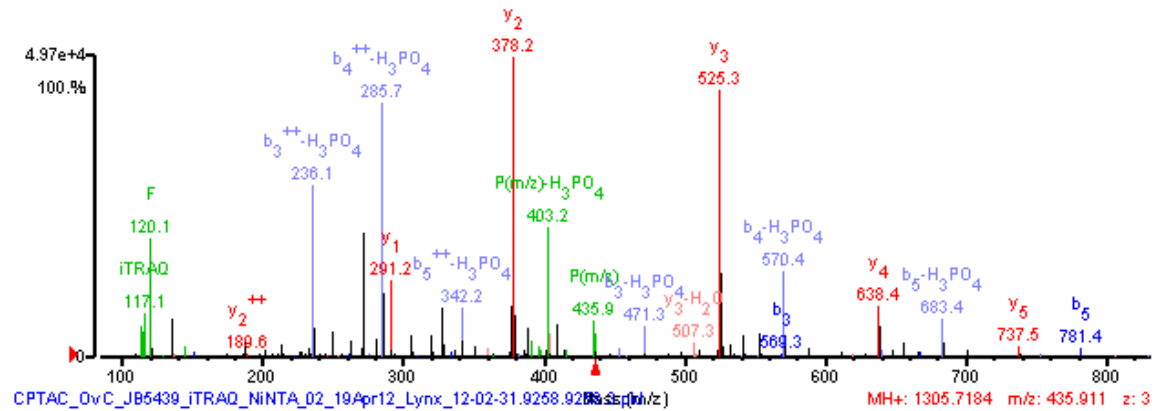



| GI-number | Protein name                                             | Gene name | Phosphosite | Sequence        |
|-----------|----------------------------------------------------------|-----------|-------------|-----------------|
| 223890147 | Kinetochole-associated protein<br>DSN1 homolog isoform 1 | DSN1      | S109        | RKsLHPIHQITELSR |

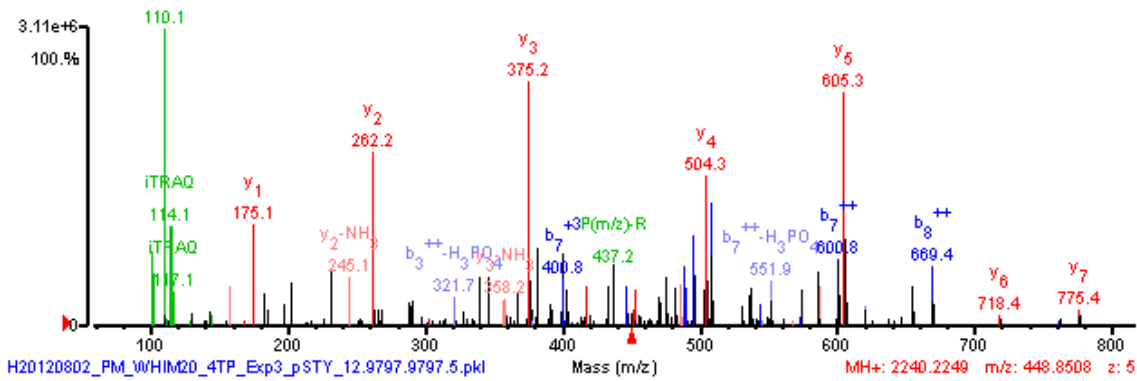

| GI-number | Protein name      | Gene name | Phosphosite | Sequence               |
|-----------|-------------------|-----------|-------------|------------------------|
| 116256352 | Tuberin isoform 1 | TSC2      | S1364       | VVsEGGRPSVDLSFQPSQPLSK |

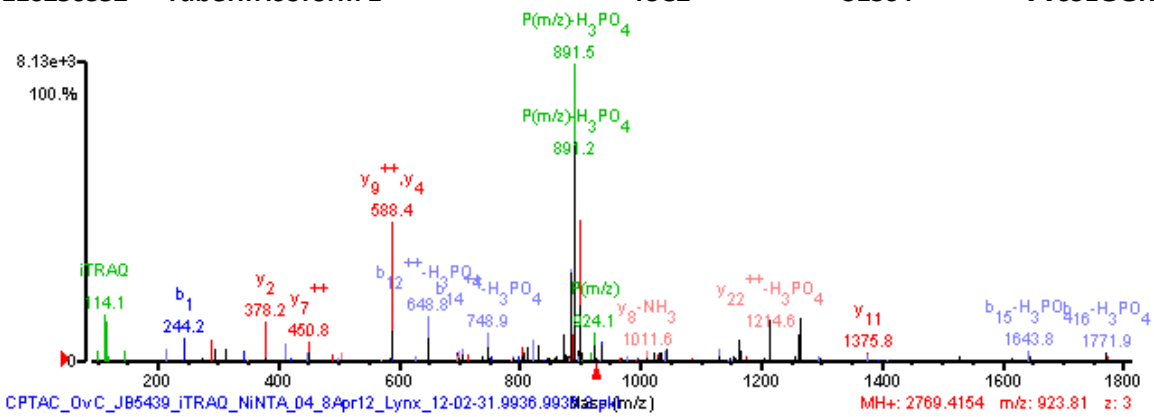

| GI-number | Protein name                                        | Gene name | Phosphosite | Sequence                        |
|-----------|-----------------------------------------------------|-----------|-------------|---------------------------------|
| 61743954  | Neuroblast differentiation-associated protein AHNAK | AHNAK     | S5186       | VKTPs*FGIS*APQVSIP<br>DVNVNLKGP |

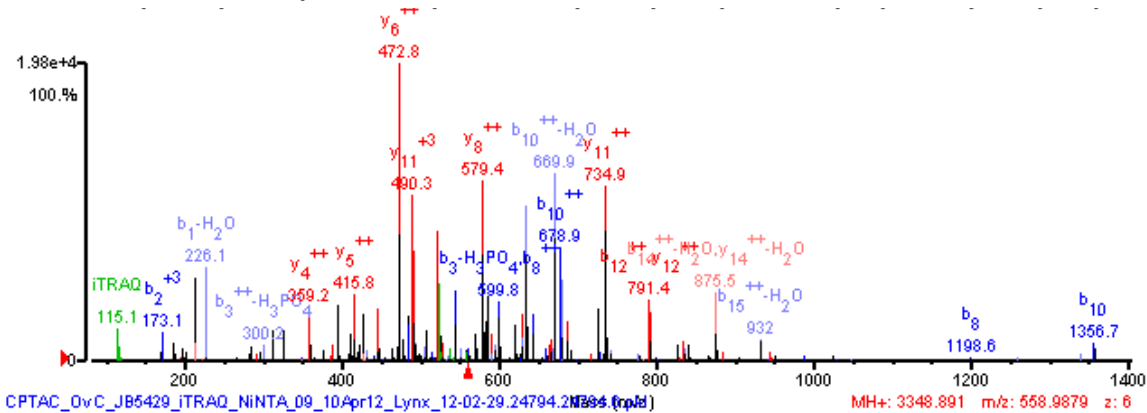

| GI-number | Protein name                                 | Gene name | Phosphosite | Sequence      |
|-----------|----------------------------------------------|-----------|-------------|---------------|
| 4505611   | Poly(A)-specific ribonuclease PARN isoform 1 | PARN      | S557        | NNsFTAPSTVGKR |

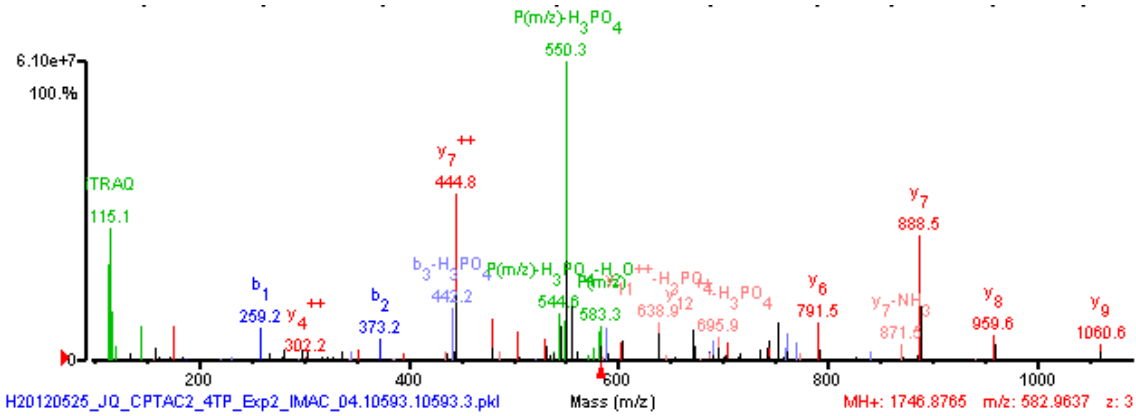

| GI-number | Protein name                      | Gene name | Phosphosite | Sequence     |
|-----------|-----------------------------------|-----------|-------------|--------------|
| 24371248  | FUN14 domain-containing protein 2 | FUNDC2    | S151        | IRKSNQIPTEVR |

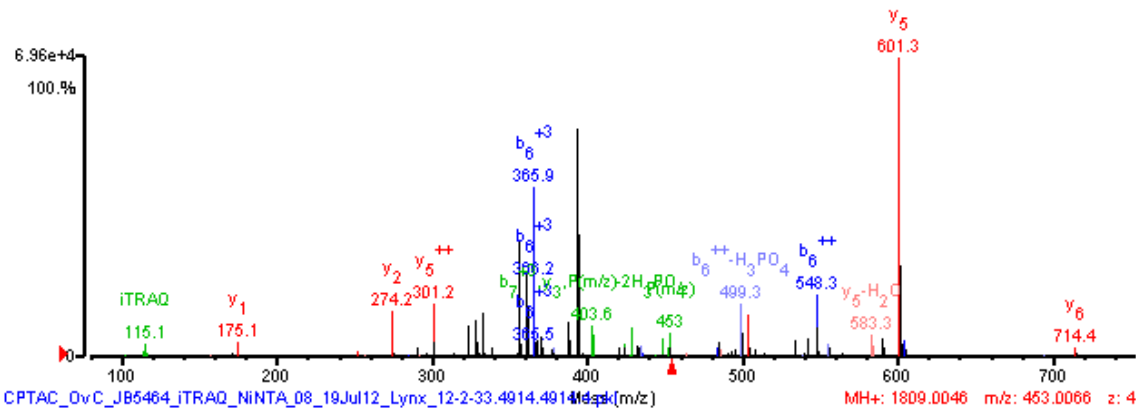

| GI-number | Protein name      | Gene name | Phosphosite | Sequence          |
|-----------|-------------------|-----------|-------------|-------------------|
| 116256352 | Tuberin isoform 1 | TSC2      | S1254       | SLsVPAASTAKPPPLPR |

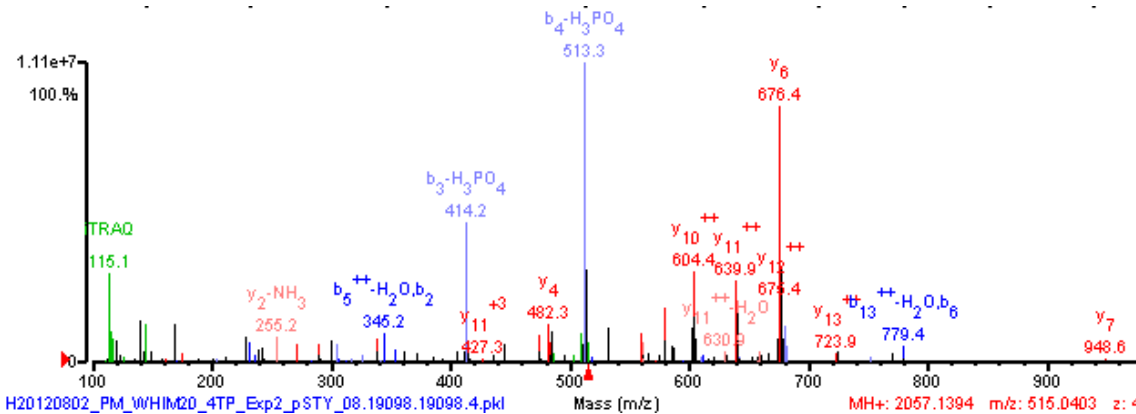

| GI-number | Protein name                       | Gene name | Phosphosite | Sequence           |
|-----------|------------------------------------|-----------|-------------|--------------------|
| 20986531  | Mitogen-activated protein kinase 1 | MAPK1     | T185 Y187   | VADPDHDTGFLtEyVATR |

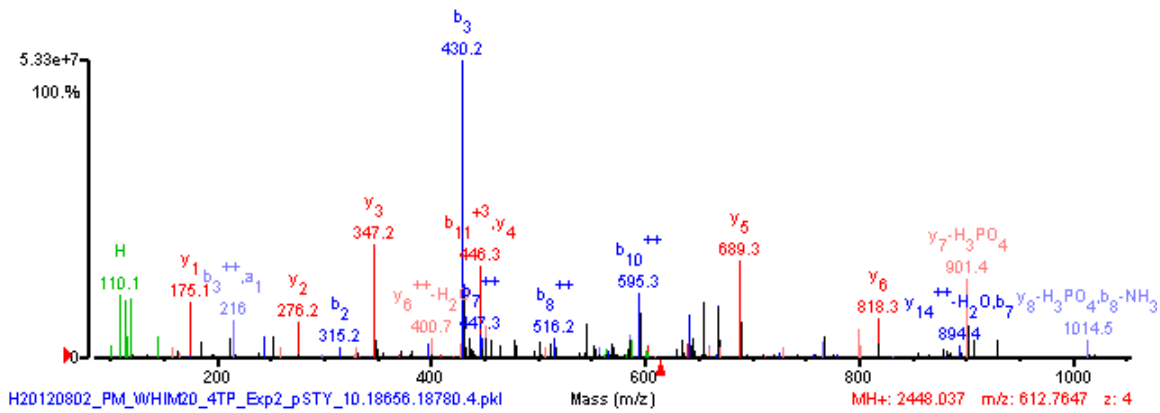

| GI-number | Protein name | Gene name | Phosphosite | Sequence    |
|-----------|--------------|-----------|-------------|-------------|
| 262359929 | Protein ELYS | AHCTF1    | S1241       | IsFVEEDVHPK |

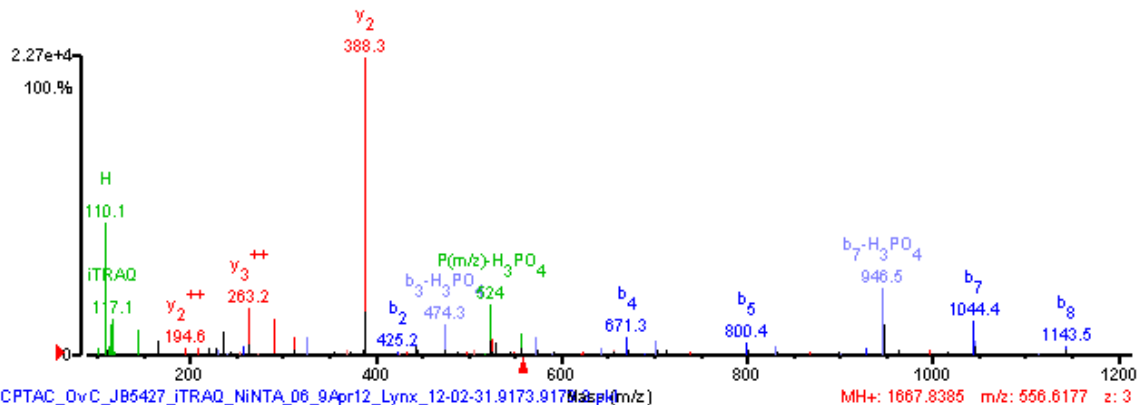

| GI-number | Protein name                         | Gene name | Phosphosite | Sequence                   |
|-----------|--------------------------------------|-----------|-------------|----------------------------|
| 27597090  | Transcription elongation factor SPT6 | SUPT6H    | S91         | KRT*s*FDDRLEDDDFDLIEENLGVK |

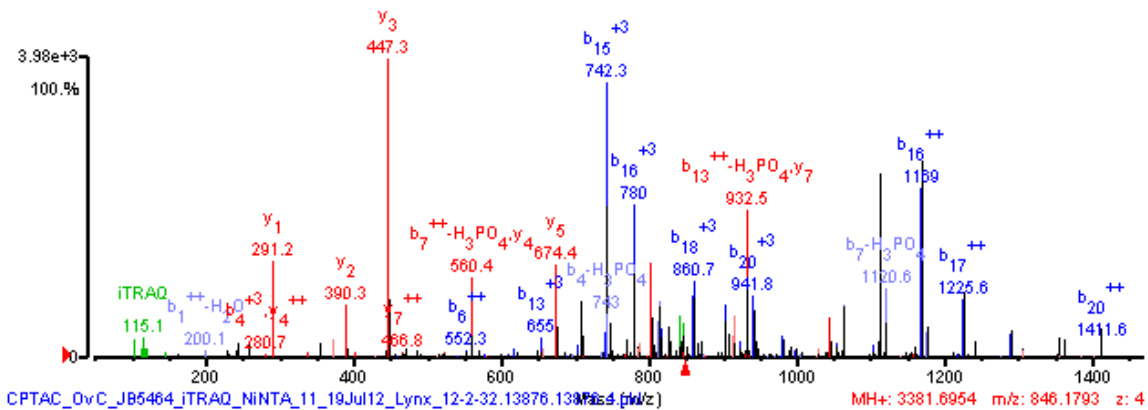

| GI-number | Protein name             | Gene name | Phosphosite | Sequence                         |
|-----------|--------------------------|-----------|-------------|----------------------------------|
| 13786127  | Cdc42 effector protein 4 | CDC42EP4  | S174        | NGAAGPHsPDLL<br>DEQAFGDLTDLPPVVK |

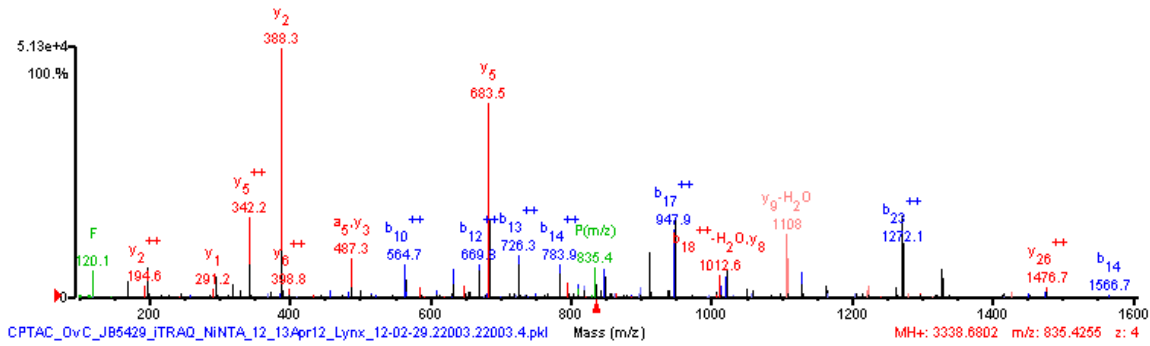

| GI-number | Protein name                               | Gene name | Phosphosite | Sequence    |
|-----------|--------------------------------------------|-----------|-------------|-------------|
| 21361891  | SH2 domain-containing protein 4A isoform a | SH2D4A    | S315        | TLSSAQEDIIR |

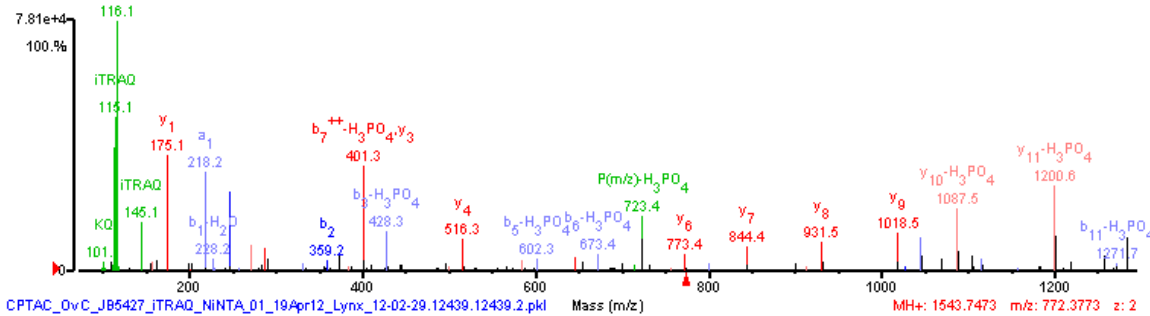

| GI-number | Protein name                           | Gene name | Phosphosite | Sequence      |
|-----------|----------------------------------------|-----------|-------------|---------------|
| 117553584 | AP-3 complex subunit delta-1 isoform 1 | AP3D1     | S567        | HRPsEADEEELAR |

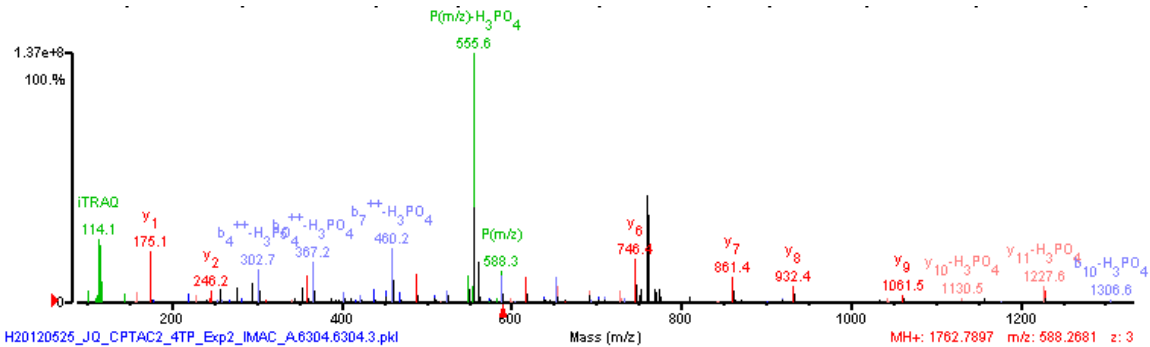

| GI-number | Protein name                  | Gene name | Phosphosite | Sequence  |
|-----------|-------------------------------|-----------|-------------|-----------|
| 208022661 | Nck-associated protein 5-like | NCKAP5L   | S767        | VDLEPVsPR |

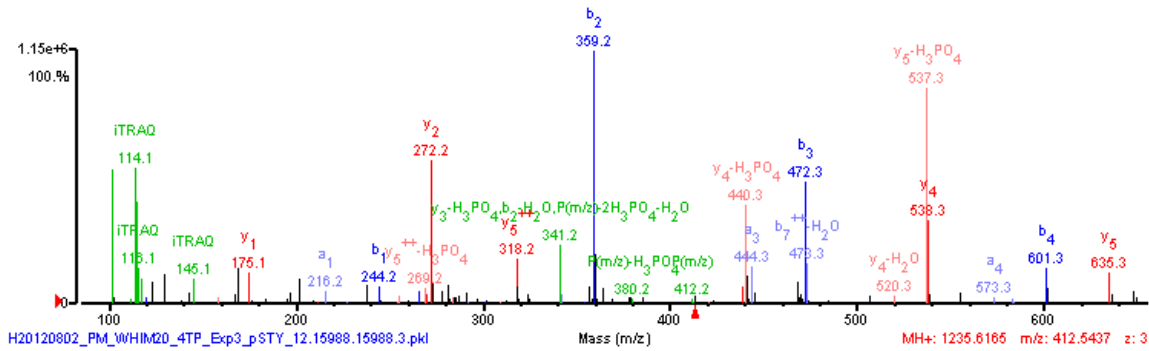

| GI-number | Protein name                       | Gene name | Phosphosite | Sequence        |
|-----------|------------------------------------|-----------|-------------|-----------------|
| 31377562  | HAUS augmin-like complex subunit 6 | HAUS6     | T584        | NQIPRtPENLITEIR |

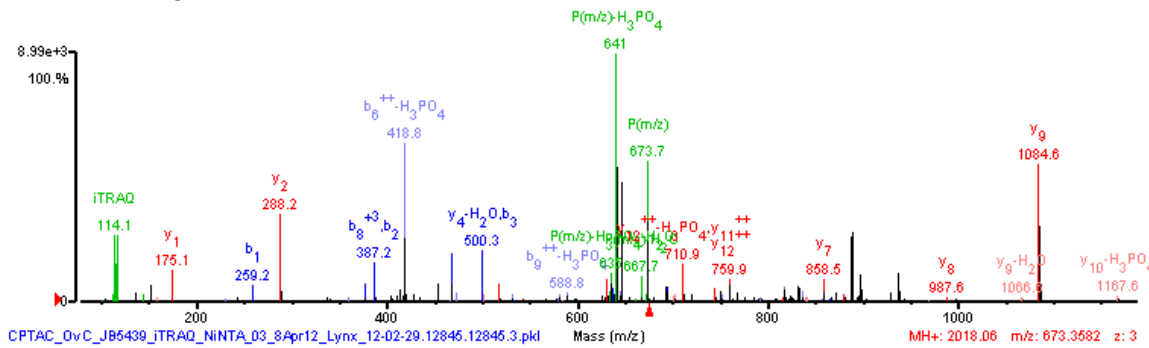

| GI-number | Protein name                      | Gene name | Phosphosite | Sequence        |
|-----------|-----------------------------------|-----------|-------------|-----------------|
| 61676188  | E3 ubiquitin-protein ligase HUWE1 | HUWE1     | S3116       | LFGHsSTSALSAILR |

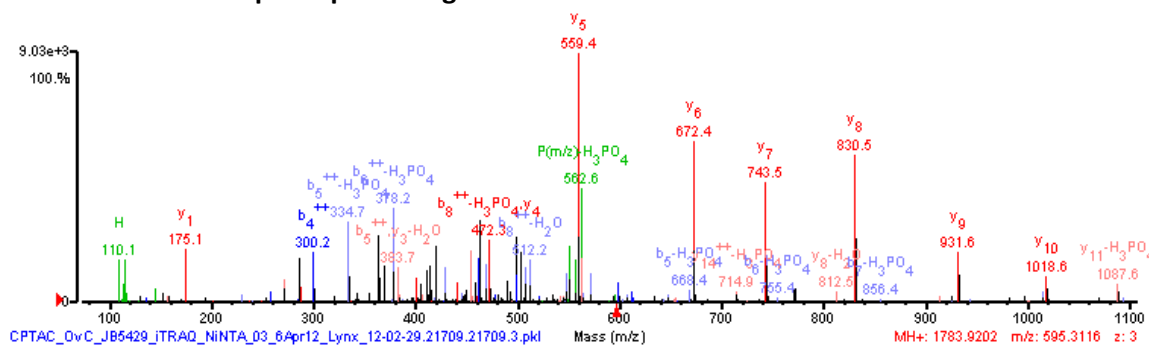

| GI-number | Protein name | Gene name | Phosphosite | Sequence                       |
|-----------|--------------|-----------|-------------|--------------------------------|
| 4557896   | Myotubularin | MTM1      | S588 S590   | LSDPPT*s*Ps*S*PSQ<br>mMPHVQTHF |

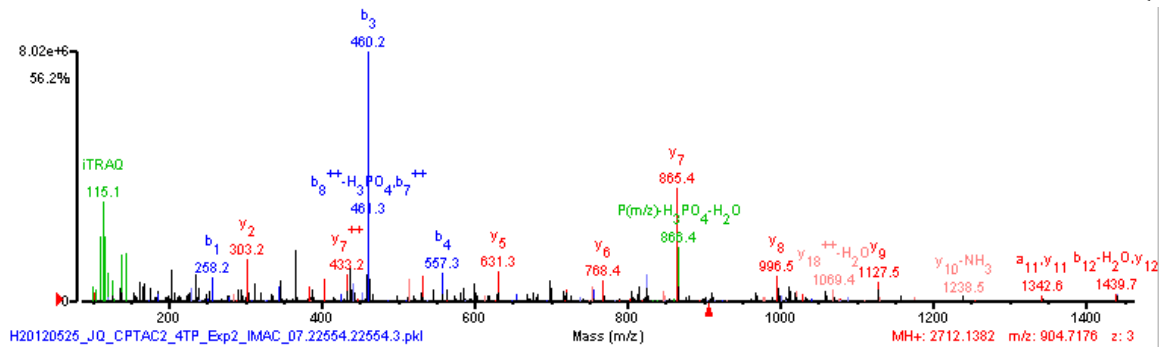

| GI-number | Protein name                 | Gene name | Phosphosite | Sequence      |
|-----------|------------------------------|-----------|-------------|---------------|
| 14670268  | Negative elongation factor E | RDBP      | S131        | sLYESFVSSDRLR |

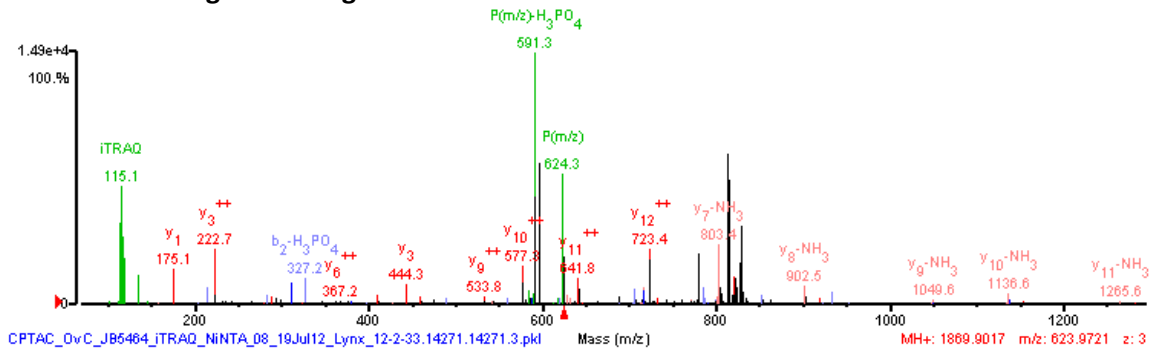

| GI-number | Protein name                                        | Gene name | Phosphosite | Sequence |
|-----------|-----------------------------------------------------|-----------|-------------|----------|
| 140161500 | Ankyrin repeat and SAM domain-containing protein 1A | ANKS1A    | S620        | AELKLSR  |

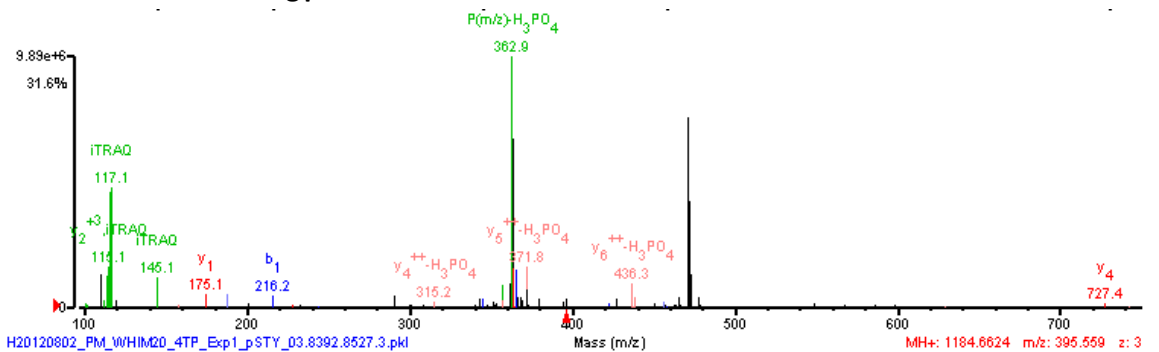

| GI-number | Protein name       | Gene name | Phosphosite | Sequence       |
|-----------|--------------------|-----------|-------------|----------------|
| 224451142 | Stathmin isoform b | STMN1     | S25         | RASGQAFELILSPR |

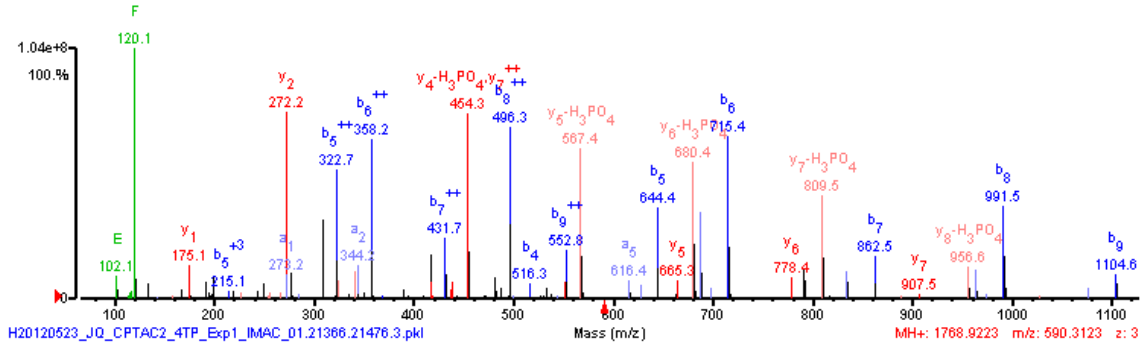

| GI-number | Protein name                     | Gene name | Phosphosite | Sequence             |
|-----------|----------------------------------|-----------|-------------|----------------------|
| 22027612  | TNF receptor-associated factor 2 | TRAF2     | S11         | AAASVTPPGsLELLQPGFSK |

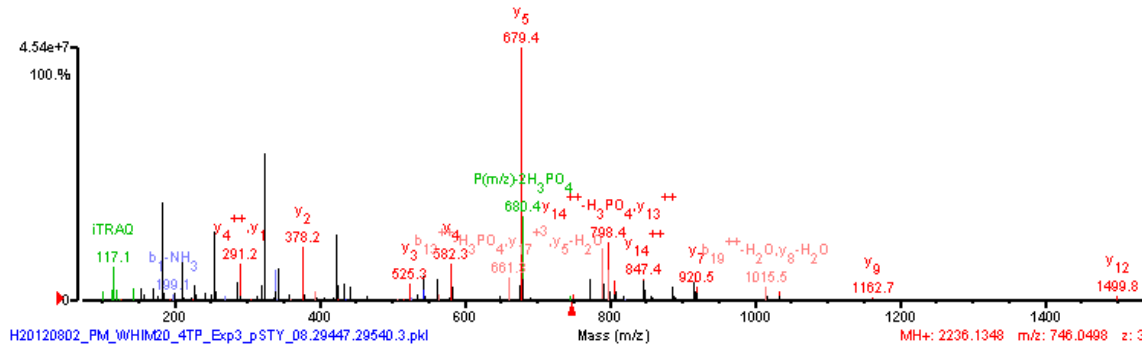

| GI-number | Protein name                             | Gene name | Phosphosite | Sequence    |
|-----------|------------------------------------------|-----------|-------------|-------------|
| 5032179   | Transcription intermediary factor 1-beta | TRIM28    | S473        | sGEGEVSGLMR |

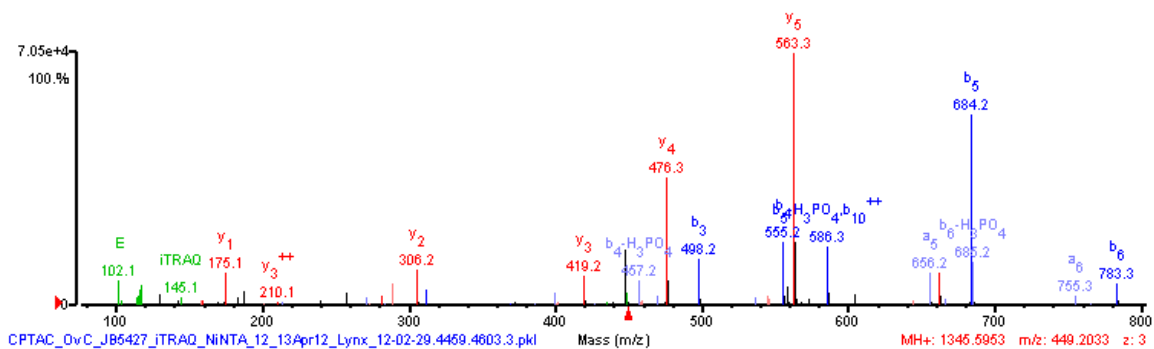

| GI-number | Protein name                      | Gene name | Phosphosite | Sequence     |
|-----------|-----------------------------------|-----------|-------------|--------------|
| 27597059  | DnaJ homolog subfamily C member 9 | DNAJC9    | S109        | KIsLEDIQAFEK |

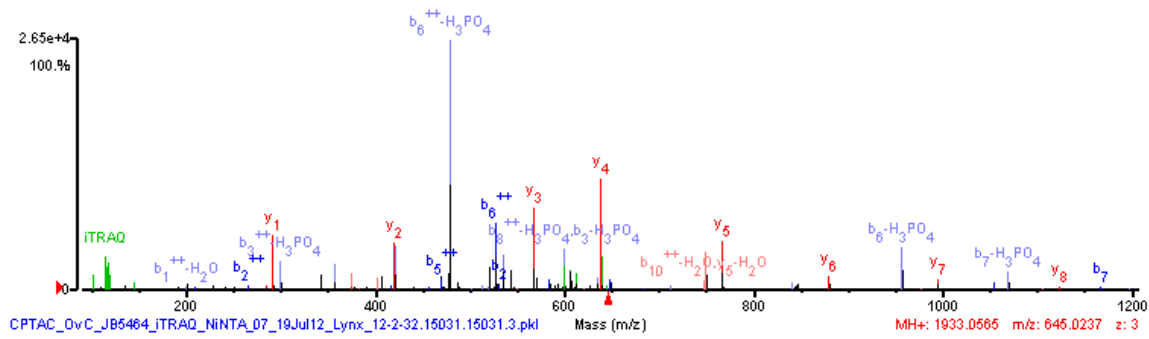

| GI-number | Protein name                    | Gene name | Phosphosite | Sequence   |
|-----------|---------------------------------|-----------|-------------|------------|
| 4504919   | Keratin, type II cytoskeletal 8 | KRT8      | S475        | LVsSSDVLPK |

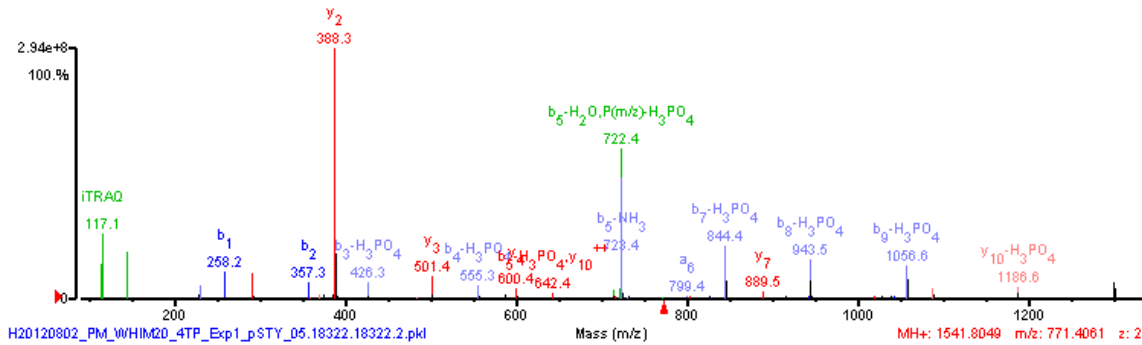

| GI-number | Protein name                         | Gene name | Phosphosite | Sequence        |
|-----------|--------------------------------------|-----------|-------------|-----------------|
| 21493029  | A-kinase anchor protein 13 isoform 2 | AKAP13    | S2561       | sLSRPSSLIEQEKQR |

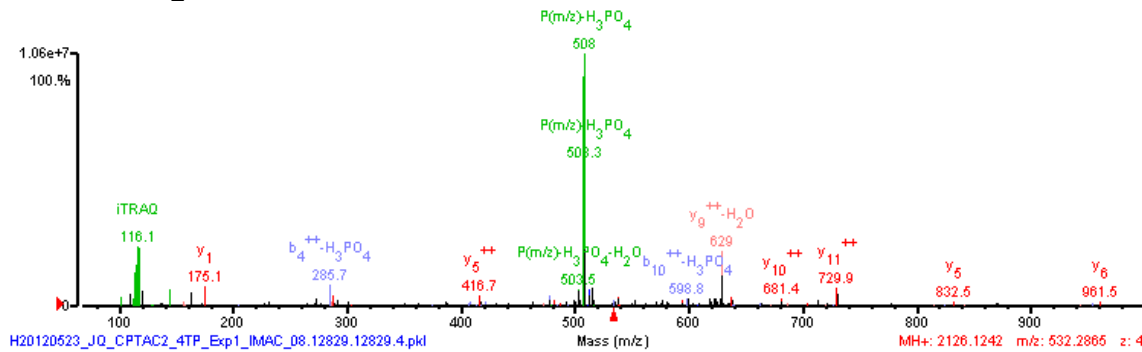



| GI-number | Protein name                        | Gene name | Phosphosite | Sequence             |
|-----------|-------------------------------------|-----------|-------------|----------------------|
| 110556636 | 182 kDa tankyrase-1-binding protein | TNKS1BP1  | S1029       | GSGGLFpSTAHVDPGALGQR |

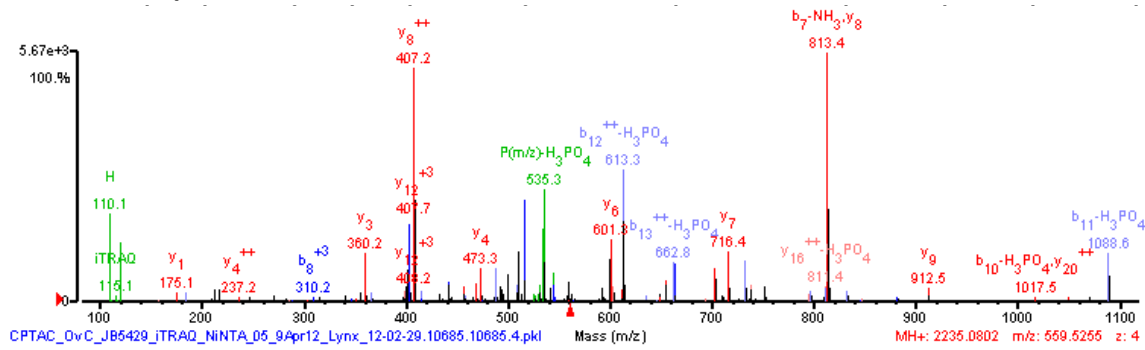

| GI-number | Protein name                   | Gene name | Phosphosite | Sequence               |
|-----------|--------------------------------|-----------|-------------|------------------------|
| 51093863  | Niban-like protein 1 isoform 1 | FAM129B   | S692 S696   | AAPEAS*s*PPAsPLQHLLPGK |

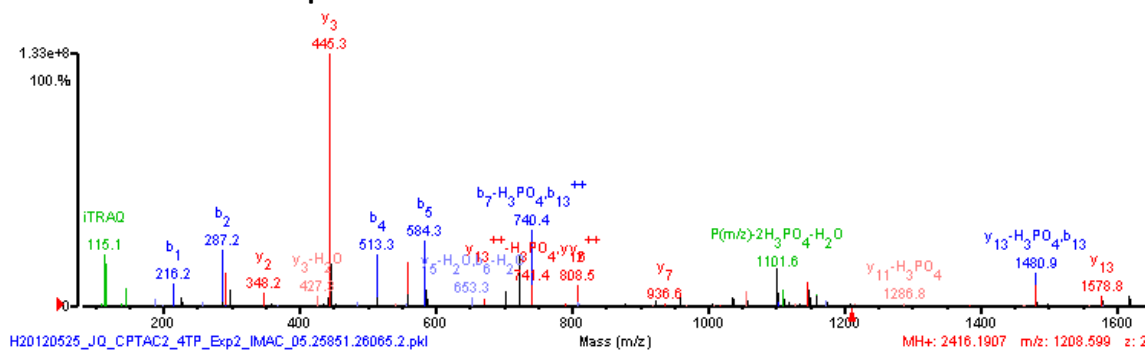

| GI-number | Protein name                         | Gene name | Phosphosite | Sequence        |
|-----------|--------------------------------------|-----------|-------------|-----------------|
| 222136641 | Serine/threonine-protein kinase Nek9 | NEK9      | S332        | SsTVTEAPIAVVTSR |

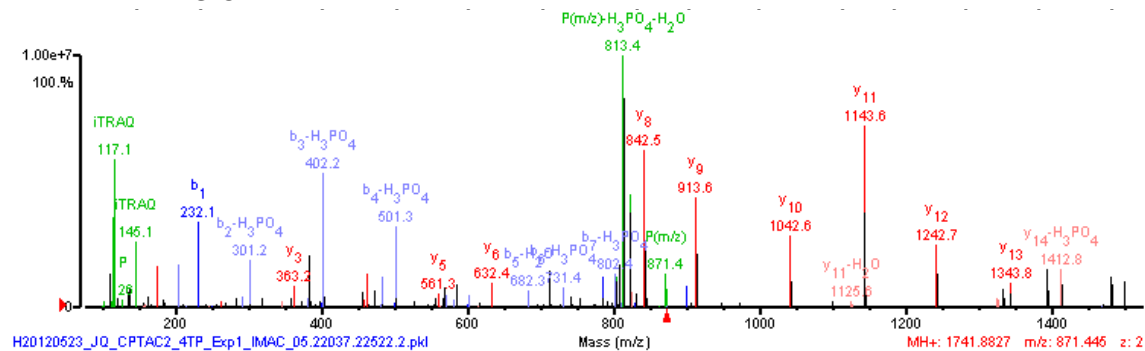

| GI-number | Protein name                            | Gene name | Phosphosite | Sequence                    |
|-----------|-----------------------------------------|-----------|-------------|-----------------------------|
| 19424132  | Serine/threonine-protein kinase<br>Nek7 | NEK7      | S187        | FFSSKtTAAHSL<br>VGTPYYmSPER |

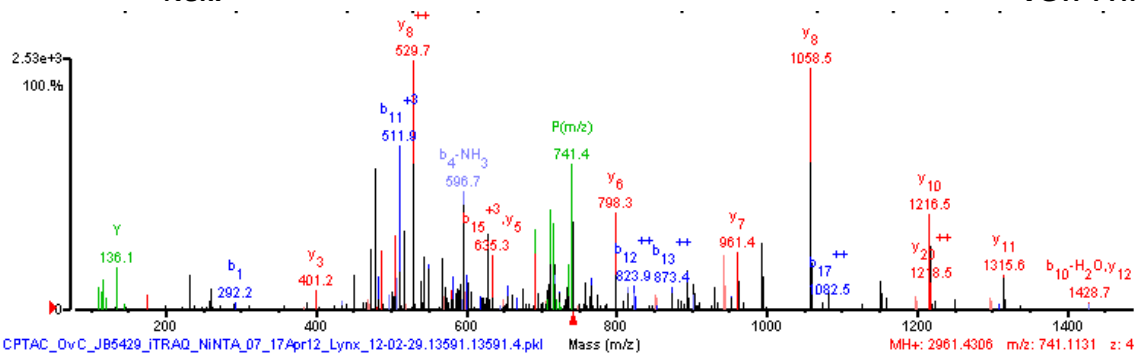

| GI-number | Protein name                                        | Gene name | Phosphosite | Sequence                |
|-----------|-----------------------------------------------------|-----------|-------------|-------------------------|
| 7705373   | LIM domain and actin-binding<br>protein 1 isoform b | LIMA1     | S604        | SRPFTVAASFQS*T*S*VKs*PK |

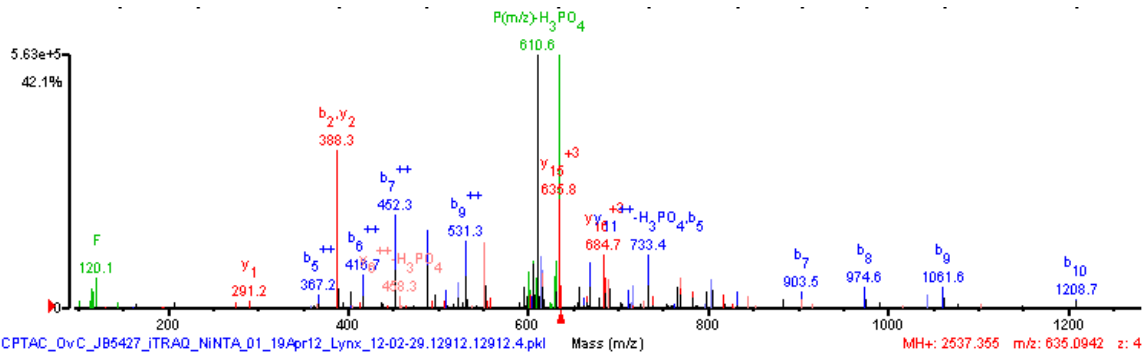

| GI-number | Protein name                                      | Gene name | Phosphosite | Sequence         |
|-----------|---------------------------------------------------|-----------|-------------|------------------|
| 21070984  | Peptidyl-glycine alpha-amidating<br>monooxygenase | PAM       | S919        | GKGsGGLNLGNFFASR |

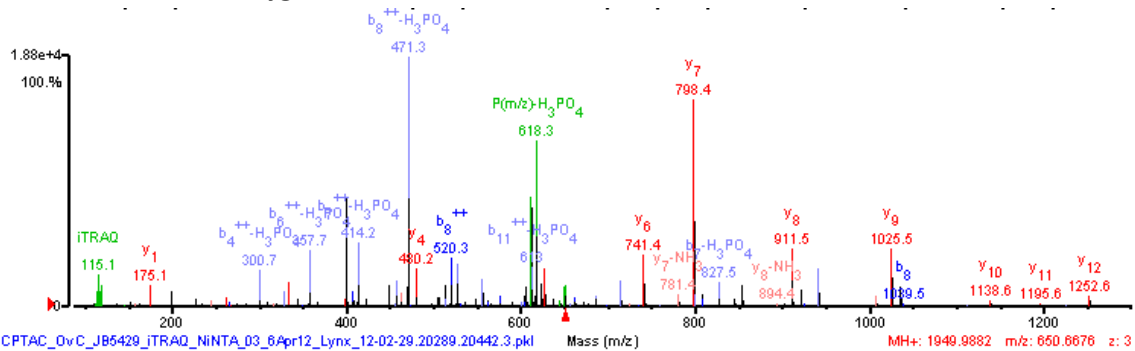

| GI-number | Protein name                   | Gene name | Phosphosite | Sequence       |
|-----------|--------------------------------|-----------|-------------|----------------|
| 5729858   | Nuclear receptor coactivator 2 | NCOA2     | S771        | LERLSKtDPASNTK |

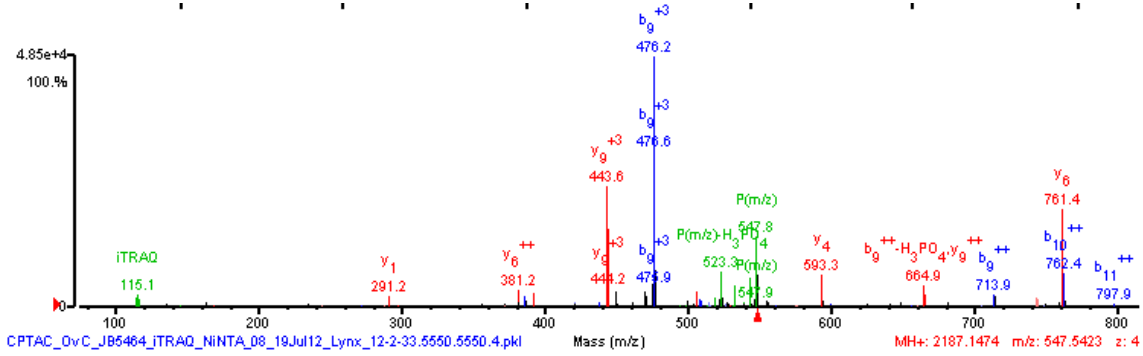

| GI-number | Protein name              | Gene name | Phosphosite | Sequence   |
|-----------|---------------------------|-----------|-------------|------------|
| 289577098 | Protein Shroom1 isoform 1 | SHROOM1   | S302        | LGDAFRPASr |

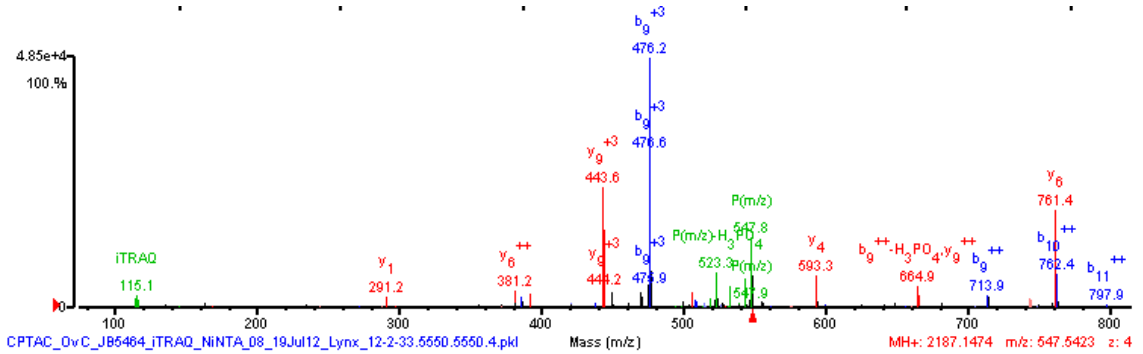

| GI-number | Protein name                 | Gene name | Phosphosite | Sequence      |
|-----------|------------------------------|-----------|-------------|---------------|
| 14670268  | Negative elongation factor E | RDBP      | S115        | SlSADDDLQESSR |

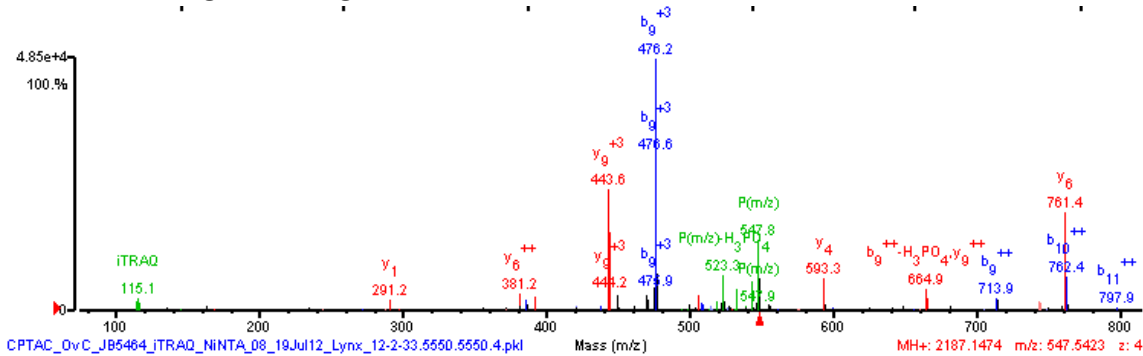

| GI-number | Protein name                                                 | Gene name | Phosphosite | Sequence                            |
|-----------|--------------------------------------------------------------|-----------|-------------|-------------------------------------|
| 87299628  | Biorientation of chromosomes in cell division protein 1-like | BOD1L     | S635        | RL <b>S</b> ESLHVVDENK <b>N</b> ESK |

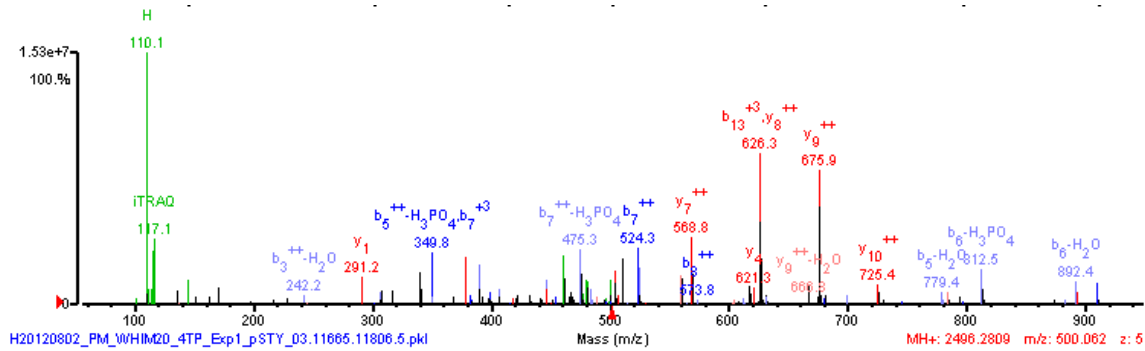

| GI-number | Protein name            | Gene name | Phosphosite | Sequence                                                                     |
|-----------|-------------------------|-----------|-------------|------------------------------------------------------------------------------|
| 112421108 | Protein capicua homolog | CIC       | S739        | SA <b>A</b> ATsP <b>A</b> PHLV <b>A</b> G <b>P</b> LL <b>G</b> TV <b>G</b> K |

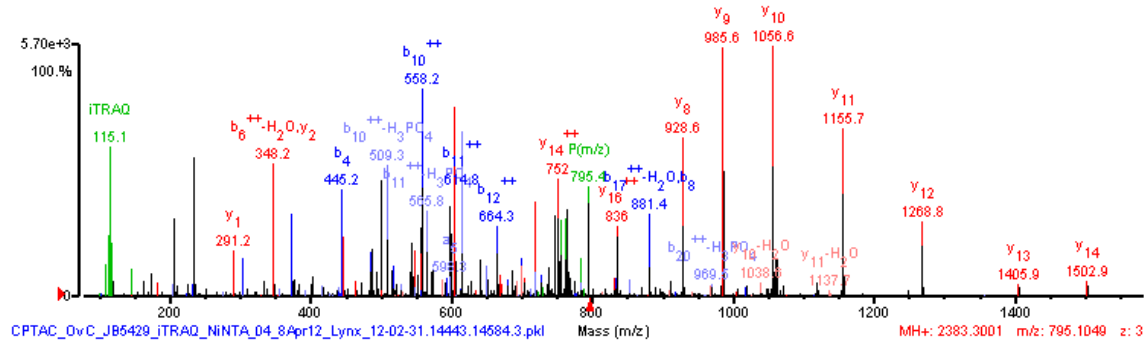

| GI-number | Protein name                         | Gene name | Phosphosite | Sequence                                                                          |
|-----------|--------------------------------------|-----------|-------------|-----------------------------------------------------------------------------------|
| 32261324  | SHC-transforming protein 1 isoform 2 | SHC1      | Y318        | EL <b>F</b> DD <b>P</b> S <b>y</b> V <b>N</b> V <b>Q</b> N <b>L</b> DK <b>A</b> R |

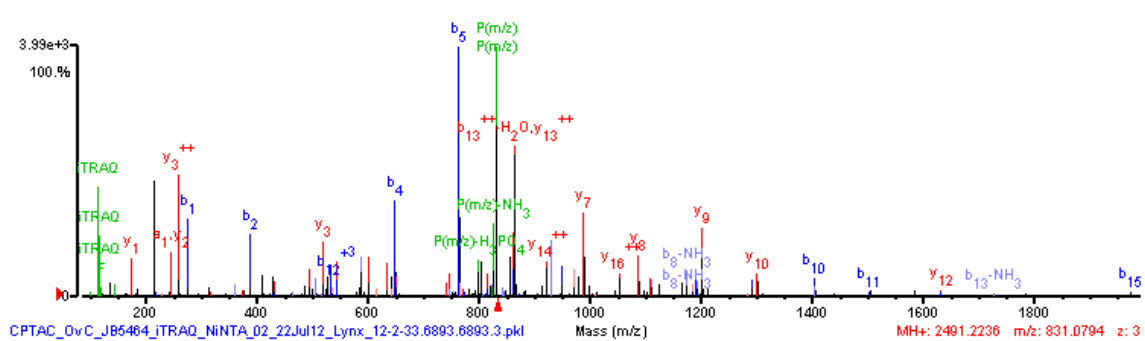

| GI-number | Protein name                   | Gene name | Phosphosite | Sequence          |
|-----------|--------------------------------|-----------|-------------|-------------------|
| 30023820  | Hypothetical protein LOC162427 | FAM134C   | S26         | DVSGSWERDQQVEAAQR |

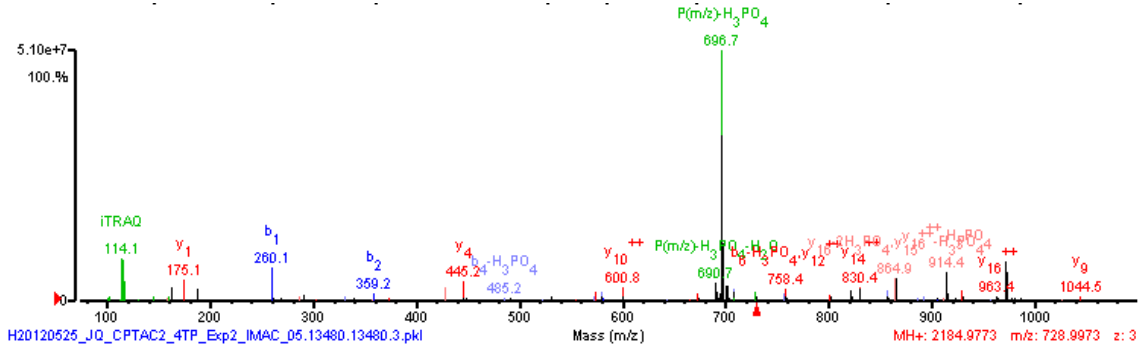

| GI-number | Protein name                        | Gene name | Phosphosite | Sequence                |
|-----------|-------------------------------------|-----------|-------------|-------------------------|
| 4759050   | Ribosomal protein S6 kinase alpha-3 | RPS6KA3   | T577        | AENGLLmtPCYTANFVAPEVLKR |

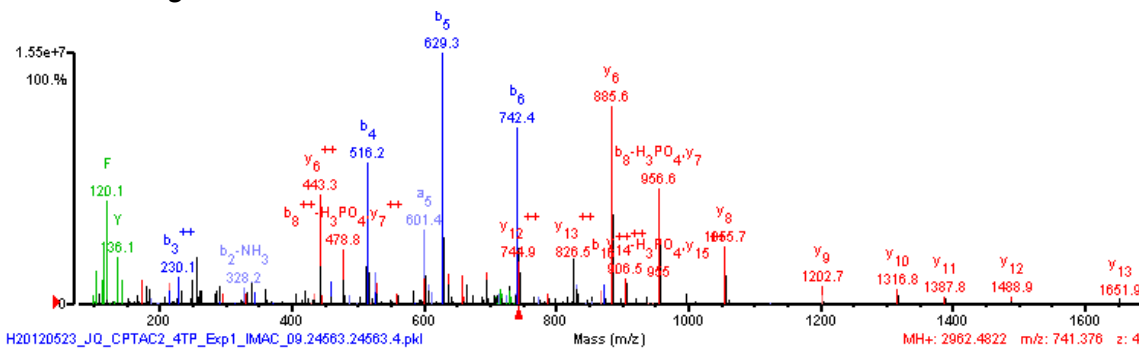

| GI-number | Protein name                          | Gene name | Phosphosite | Sequence                 |
|-----------|---------------------------------------|-----------|-------------|--------------------------|
| 301129165 | Death-inducer obliterator 1 isoform c | DIDO1     | S1456       | RNsVERPAEPVAGAATPSLVEQQK |

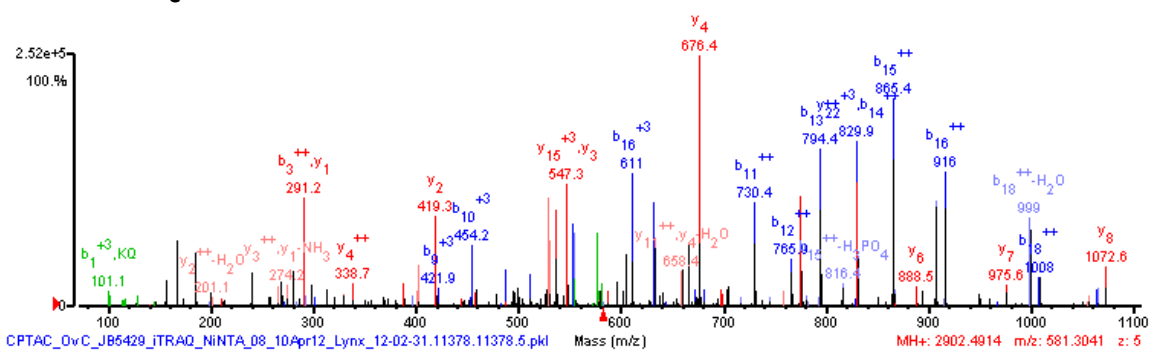

| GI-number | Protein name                         | Gene name | Phosphosite | Sequence   |
|-----------|--------------------------------------|-----------|-------------|------------|
| 4826730   | Serine/threonine-protein kinase mTOR | MTOR      | S1261       | LHVSTINLQK |

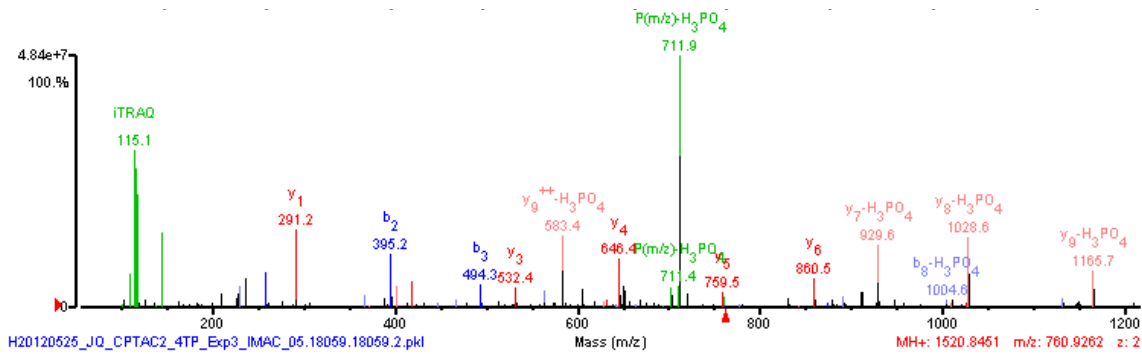

| GI-number | Protein name                                                     | Gene name | Phosphosite | Sequence          |
|-----------|------------------------------------------------------------------|-----------|-------------|-------------------|
| 41281496  | Mediator of RNA polymerase II transcription subunit 24 isoform 1 | MED24     | S862        | LLSNEDDANILSSPTDR |

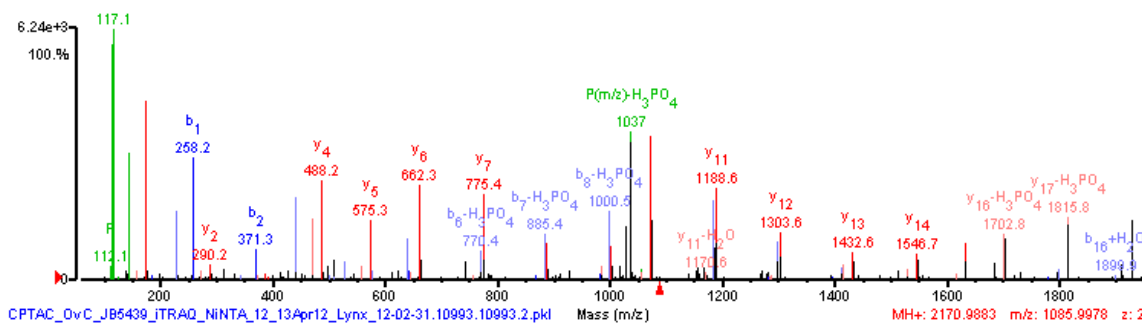

| GI-number | Protein name                                 | Gene name | Phosphosite | Sequence         |
|-----------|----------------------------------------------|-----------|-------------|------------------|
| 120659782 | Serine/threonine-protein kinase D2 isoform A | PRKD2     | S214        | LGTSEsLPCTAEELSR |

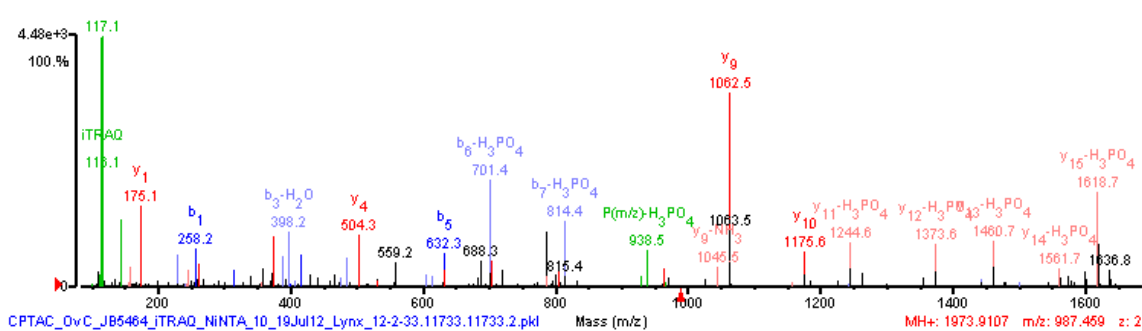

| GI-number | Protein name                       | Gene name | Phosphosite | Sequence |
|-----------|------------------------------------|-----------|-------------|----------|
| 5031689   | Serine/threonine-protein kinase D3 | PRKD3     | S731        | IIGEKFR  |

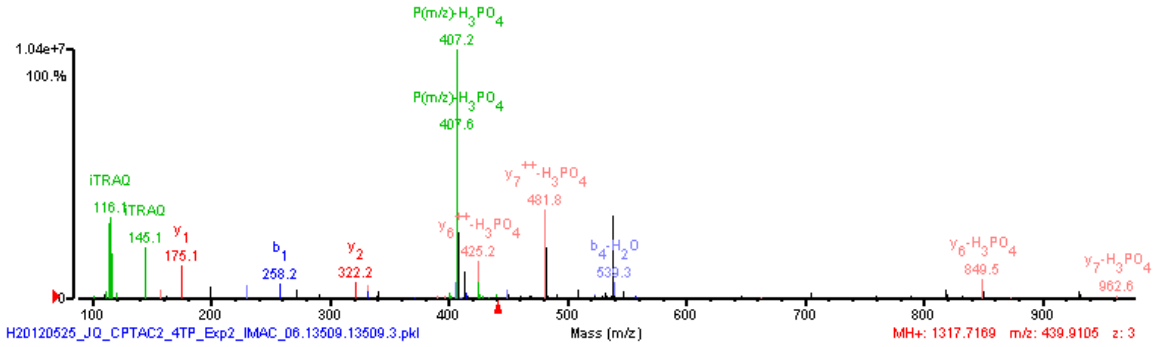

| GI-number | Protein name                        | Gene name | Phosphosite | Sequence     |
|-----------|-------------------------------------|-----------|-------------|--------------|
| 262399371 | Transmembrane protein 201 isoform 1 | TMEM201   | S454        | ALSLGTIPSLTR |

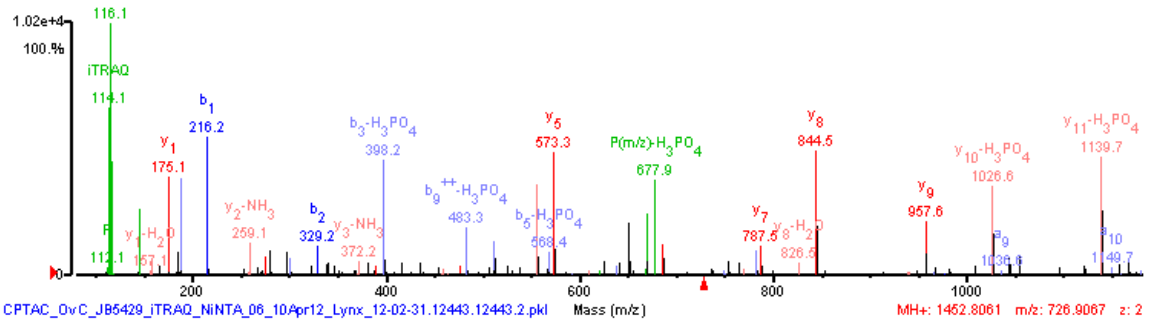

| GI-number | Protein name                      | Gene name | Phosphosite | Sequence |
|-----------|-----------------------------------|-----------|-------------|----------|
| 48762920  | 6-phosphofructokinase, liver type | PFKL      | S775        | RTLMDKGF |

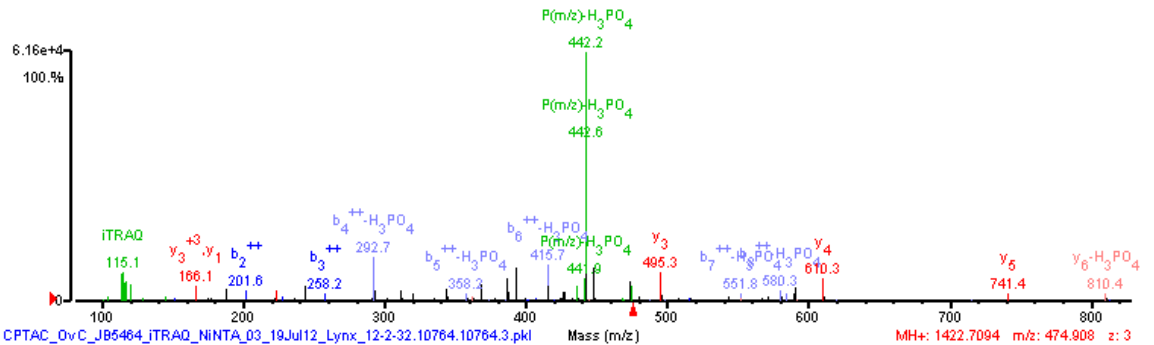

| GI-number | Protein name                                | Gene name | Phosphosite | Sequence             |
|-----------|---------------------------------------------|-----------|-------------|----------------------|
| 6005884   | Translocon-associated protein subunit gamma | SSR3      | S105        | KL <sup>E</sup> ADNR |

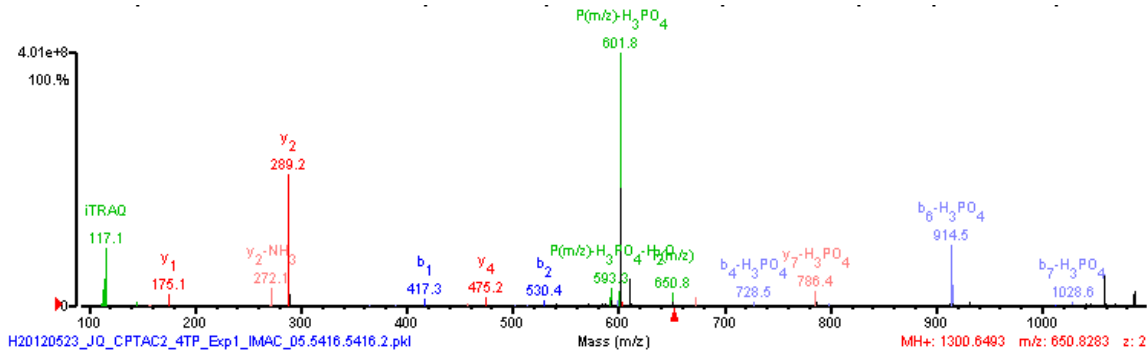

| GI-number | Protein name                       | Gene name | Phosphosite | Sequence          |
|-----------|------------------------------------|-----------|-------------|-------------------|
| 54112429  | Dedicator of cytokinesis protein 7 | DOCK7     | S452        | T*T*s*GDDACNLTSFR |

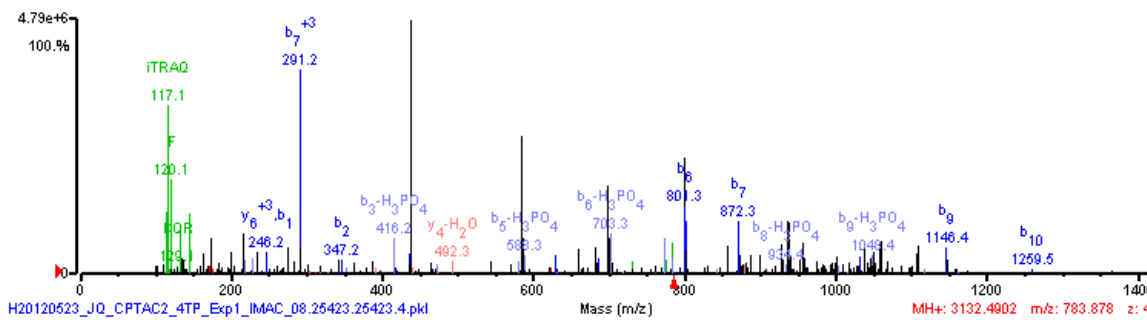

| GI-number | Protein name                        | Gene name | Phosphosite | Sequence        |
|-----------|-------------------------------------|-----------|-------------|-----------------|
| 24430146  | Nuclear pore complex protein Nup153 | NUP153    | S516        | VQMTsPSSTGSPMFK |

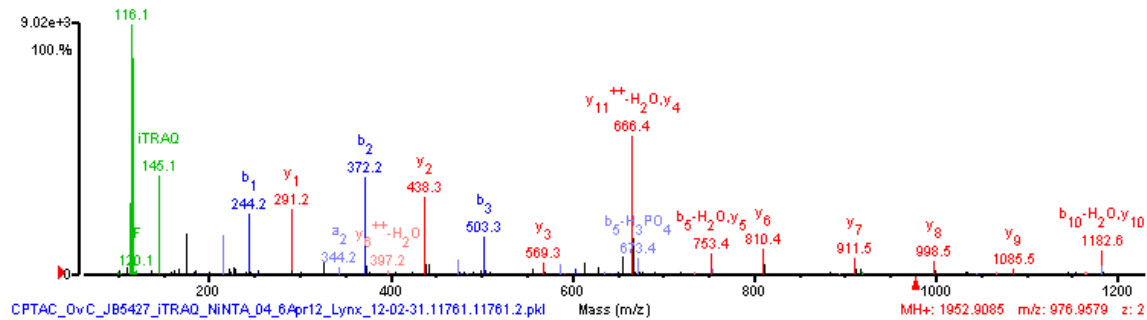



| GI-number | Protein name                | Gene name | Phosphosite | Sequence              |
|-----------|-----------------------------|-----------|-------------|-----------------------|
| 10190682  | Chromobox protein homolog 8 | CBX8      | S256        | RQDsDLVQCgVTPSSAEATGK |

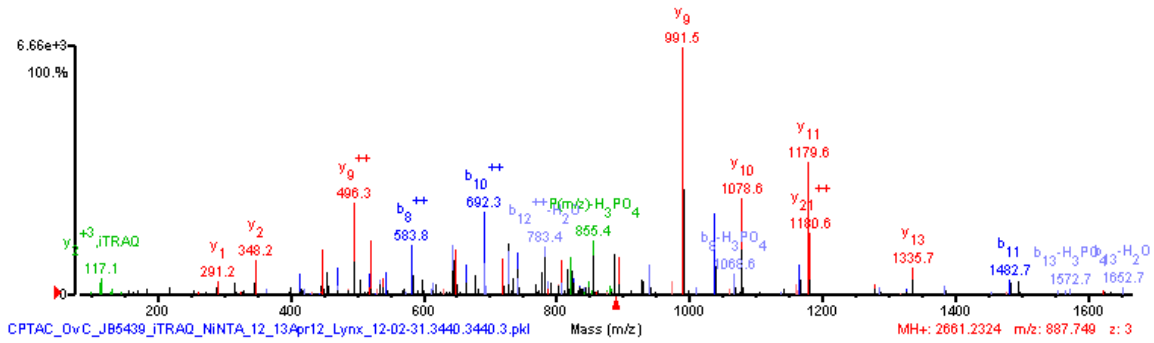

| GI-number | Protein name                                        | Gene name | Phosphosite | Sequence          |
|-----------|-----------------------------------------------------|-----------|-------------|-------------------|
| 61743954  | Neuroblast differentiation-associated protein AHNAK | AHNAK     | S135        | LKsEDGVEGDLGETQSR |

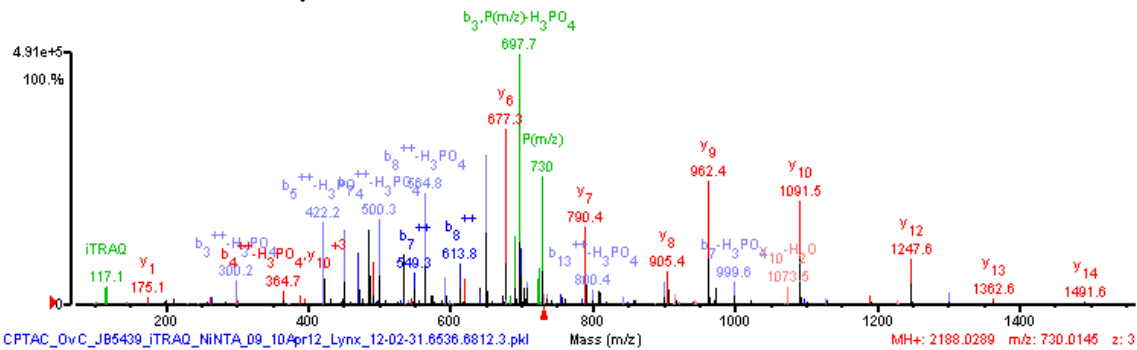

| GI-number | Protein name                                    | Gene name | Phosphosite | Sequence              |
|-----------|-------------------------------------------------|-----------|-------------|-----------------------|
| 166795297 | Cytoplasmic dynein 1 light intermediate chain 1 | DYNC1L1   | S516        | KPVTVSPTTPT*s*PTEGEAS |

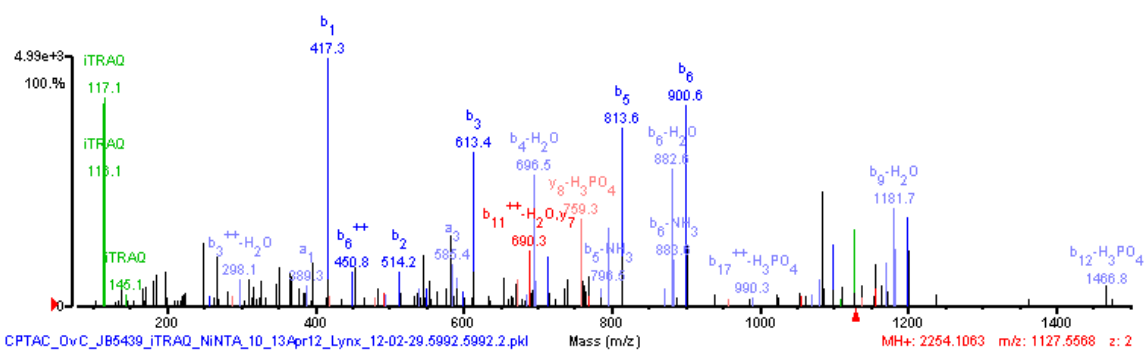

| GI-number | Protein name       | Gene name | Phosphosite | Sequence                |
|-----------|--------------------|-----------|-------------|-------------------------|
| 98986457  | Host cell factor 1 | HCFC1     | S666        | TITLVKsPISVPGGSALISNLGK |

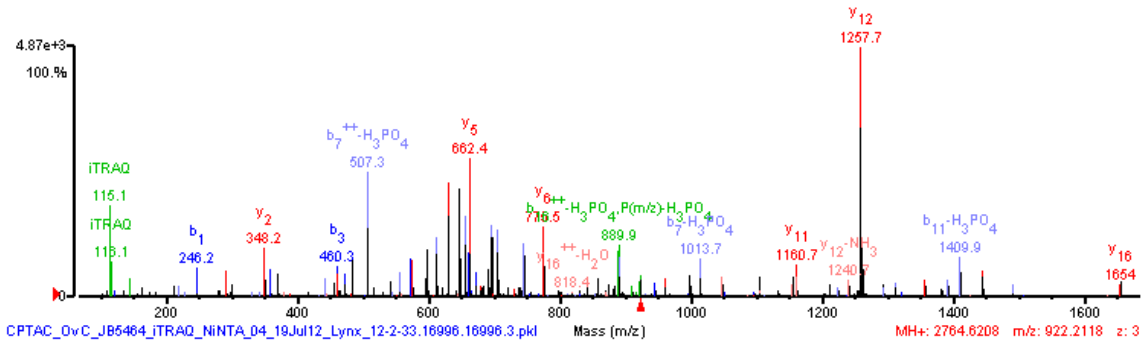

| GI-number | Protein name                        | Gene name | Phosphosite | Sequence          |
|-----------|-------------------------------------|-----------|-------------|-------------------|
| 33946327  | Nuclear pore complex protein Nup214 | NUP214    | S1023       | TPsIQPSLLPHAAPFAK |

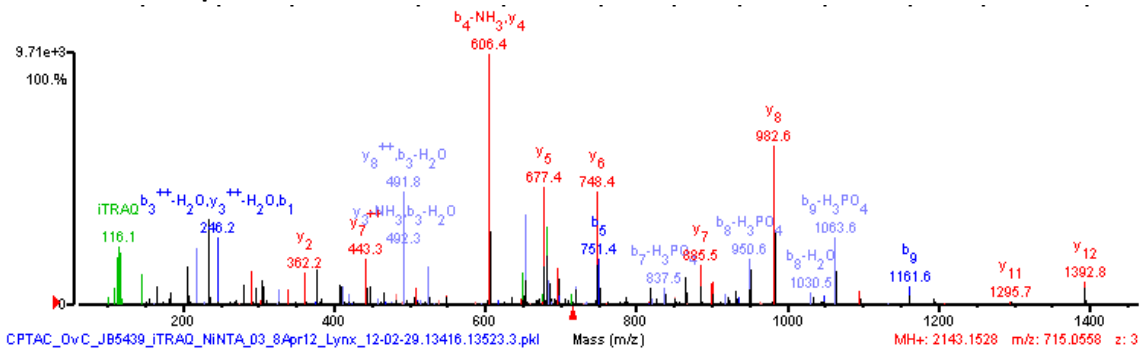

| GI-number | Protein name                 | Gene name | Phosphosite | Sequence          |
|-----------|------------------------------|-----------|-------------|-------------------|
| 38569480  | MKL/myocardin-like protein 2 | MKL2      | S882        | SGEISLPIKEEPsPISK |

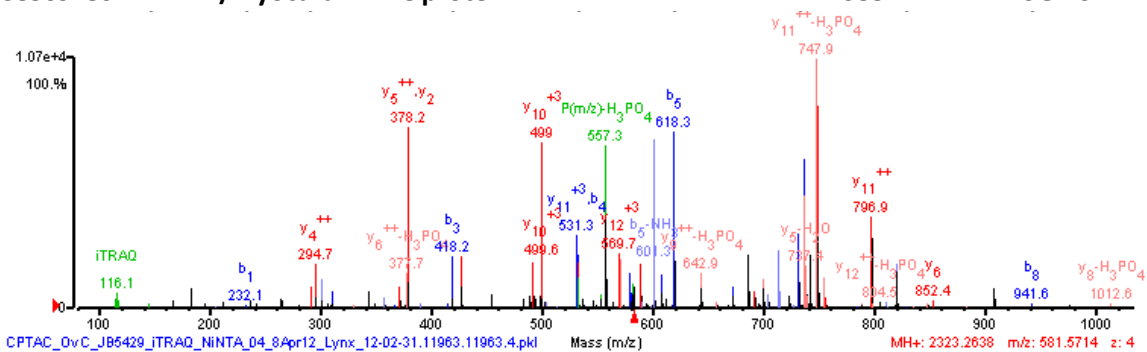

| GI-number | Protein name                  | Gene name | Phosphosite | Sequence   |
|-----------|-------------------------------|-----------|-------------|------------|
| 7662647   | Phosphatidylserine synthase 1 | PTDSS1    | S11         | TLsKDDVNYK |

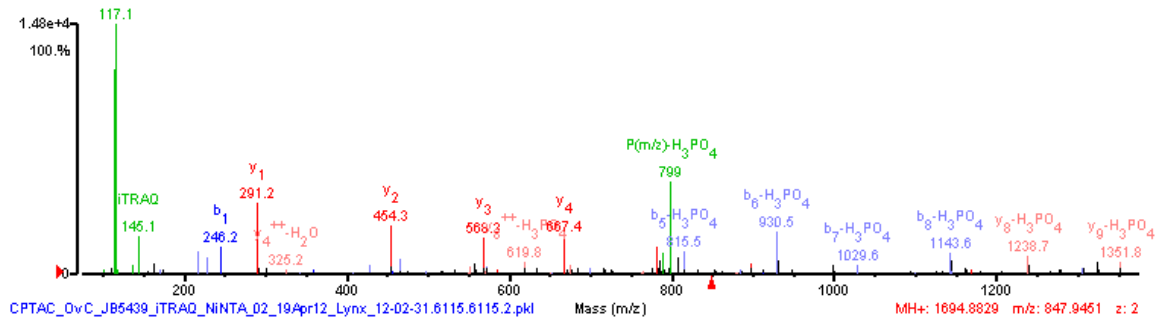

| GI-number | Protein name                        | Gene name | Phosphosite | Sequence          |
|-----------|-------------------------------------|-----------|-------------|-------------------|
| 13899253  | Uridine-cytidine kinase 1 isoform a | UCK1      | S253        | TFsEPGDHPGmLTSGKR |

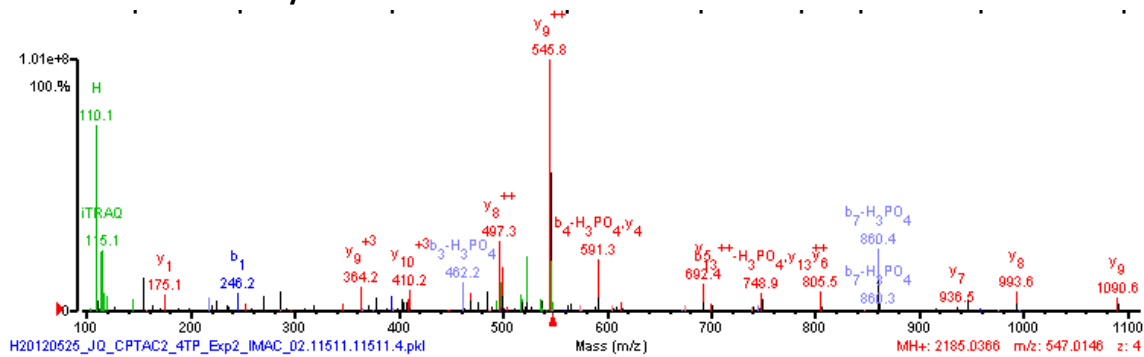

| GI-number | Protein name                               | Gene name | Phosphosite | Sequence            |
|-----------|--------------------------------------------|-----------|-------------|---------------------|
| 269847874 | Probable ATP-dependent RNA helicase YTHDC2 | YTHDC2    | S1201       | Ks*S*ADTEFSDECTTAER |

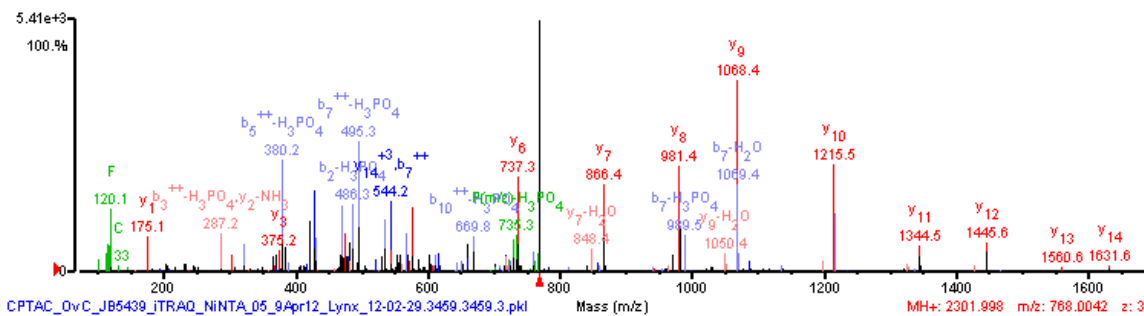

| GI-number | Protein name                                      | Gene name | Phosphosite | Sequence       |
|-----------|---------------------------------------------------|-----------|-------------|----------------|
| 23346420  | Nuclear factor related to kappa-B-binding protein | NFRKB     | S323        | KGSLAALYDLAVLK |

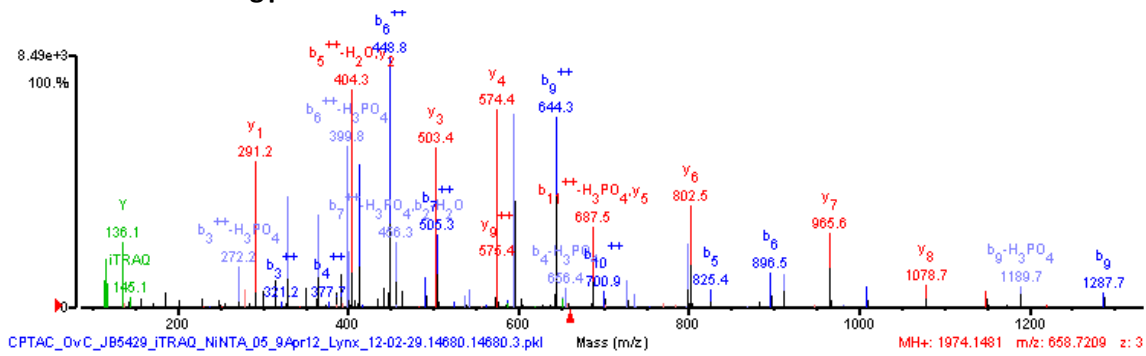

| GI-number | Protein name                                                  | Gene name | Phosphosite | Sequence                  |
|-----------|---------------------------------------------------------------|-----------|-------------|---------------------------|
| 190341074 | Pyridoxal-dependent decarboxylase domain-containing protein 1 | PDXDC1    | S710        | sLRGSDALSETSSVSHIEDLEKVER |

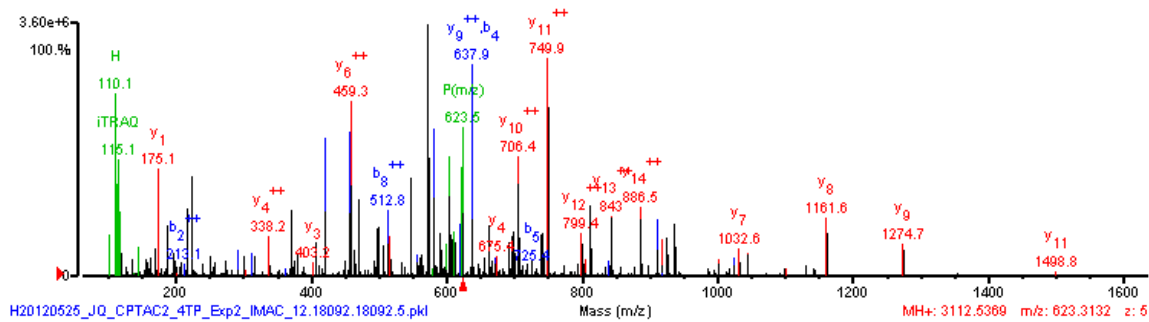

| GI-number | Protein name         | Gene name | Phosphosite | Sequence |
|-----------|----------------------|-----------|-------------|----------|
| 71040094  | Arfaptin-1 isoform 1 | ARFIP1    | S132        | KWslNTYK |

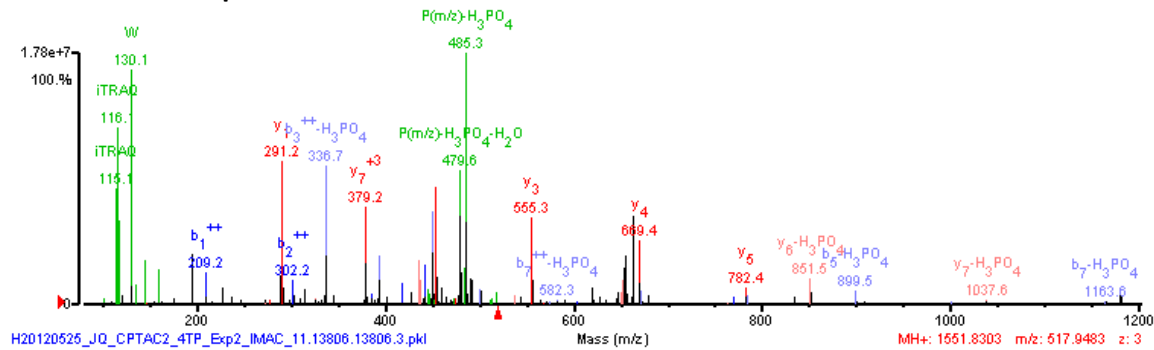

| GI-number | Protein name                           | Gene name | Phosphosite | Sequence                       |
|-----------|----------------------------------------|-----------|-------------|--------------------------------|
| 112382252 | Spectrin beta chain, brain 1 isoform 2 | SPTBN1    | S14         | TSSISGPLsPAYTGQV<br>PYNYNQLEGR |

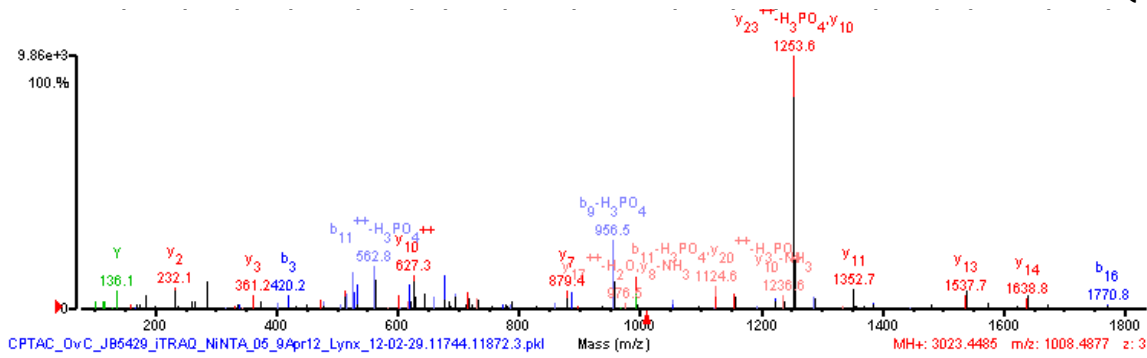

| GI-number | Protein name                  | Gene name | Phosphosite | Sequence         |
|-----------|-------------------------------|-----------|-------------|------------------|
| 150418007 | E3 SUMO-protein ligase RanBP2 | RANBP2    | S1509       | KQsLPATSIPTPASFk |

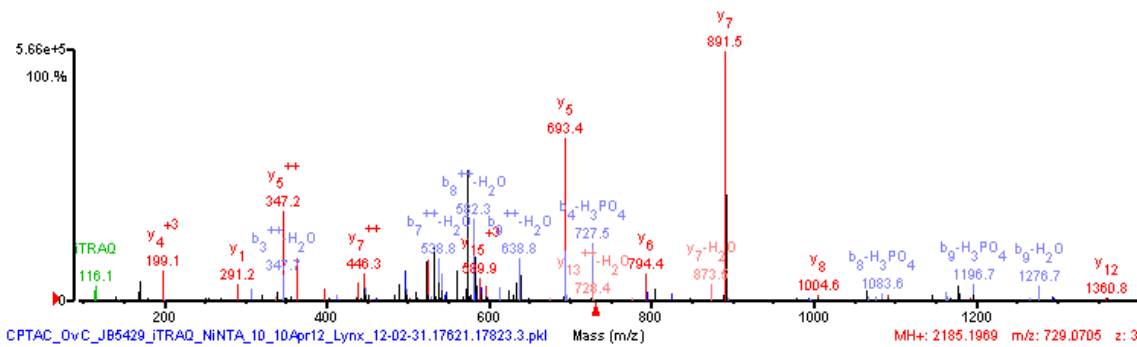

| GI-number | Protein name                      | Gene name | Phosphosite | Sequence       |
|-----------|-----------------------------------|-----------|-------------|----------------|
| 4503579   | Band 4.1-like protein 2 isoform a | EPB41L2   | S598        | sPTKAPHLQLIEGK |

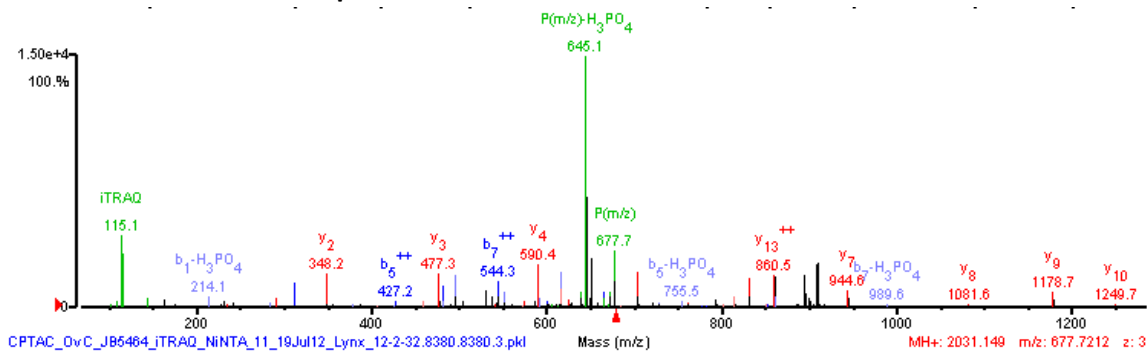

| GI-number | Protein name                                          | Gene name | Phosphosite | Sequence      |
|-----------|-------------------------------------------------------|-----------|-------------|---------------|
| 151101292 | Thioredoxin-related transmembrane protein 1 precursor | TMX1      | S270        | QRsLGPSLATDKS |

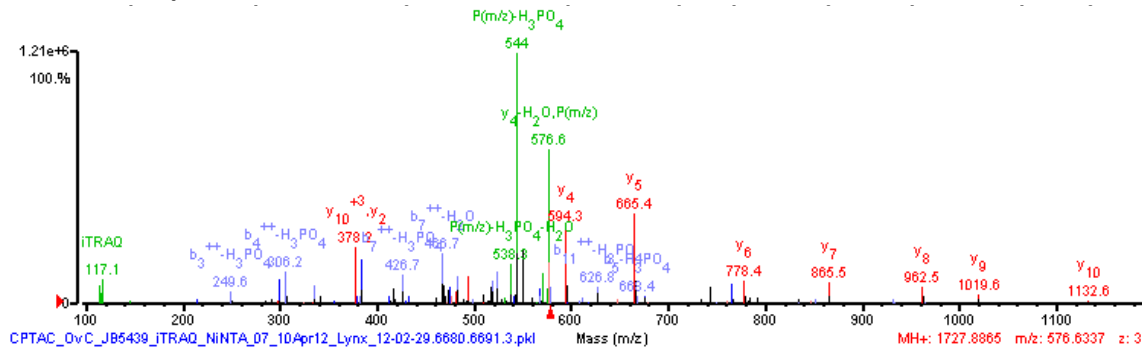

| GI-number | Protein name                                                   | Gene name | Phosphosite | Sequence               |
|-----------|----------------------------------------------------------------|-----------|-------------|------------------------|
| 109638745 | Transforming growth factor beta-1-induced transcript 1 protein | TGFB11    | S164        | LMA <sub>s</sub> LSDFR |

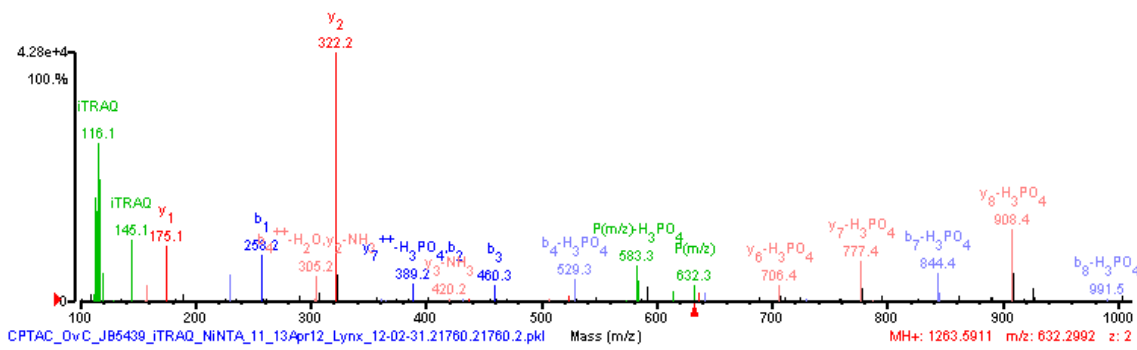

| GI-number | Protein name             | Gene name | Phosphosite | Sequence      |
|-----------|--------------------------|-----------|-------------|---------------|
| 24308171  | Zinc finger protein 280C | ZNF280C   | S80         | SEPHsPGIPEIFR |

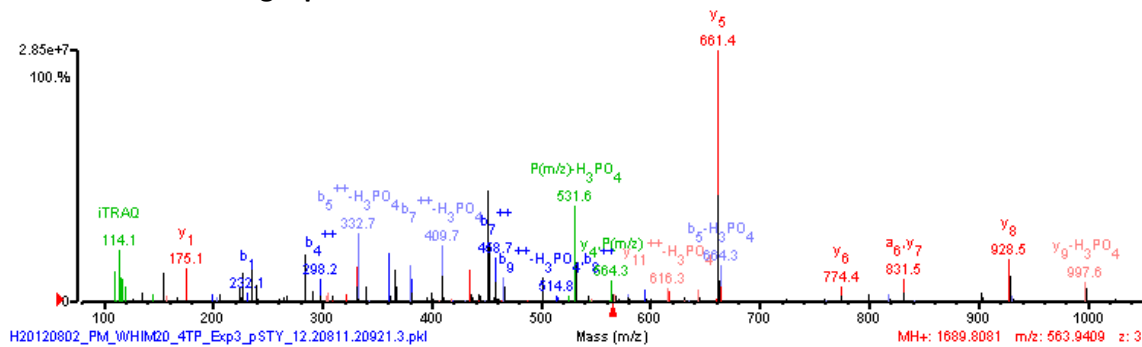

| GI-number | Protein name                                  | Gene name | Phosphosite | Sequence         |
|-----------|-----------------------------------------------|-----------|-------------|------------------|
| 167234419 | Thyroid hormone receptor-associated protein 3 | THRAP3    | S248 S253   | ERsPALKsPLQSVVVR |

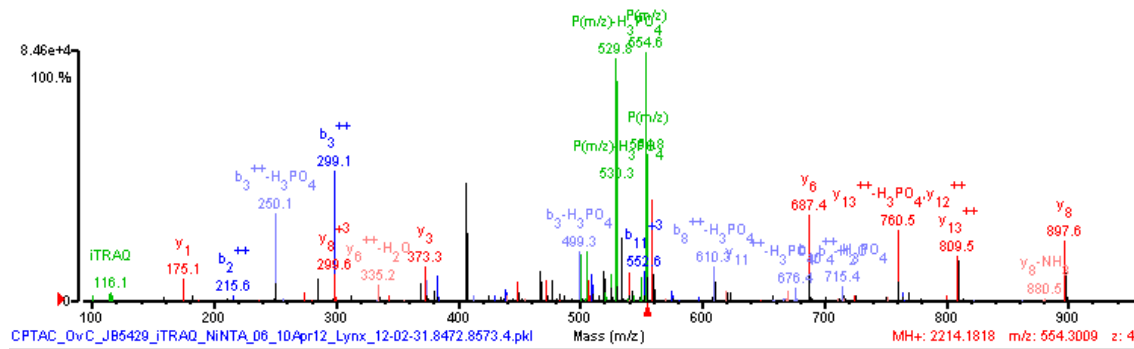

| GI-number | Protein name                    | Gene name | Phosphosite | Sequence                    |
|-----------|---------------------------------|-----------|-------------|-----------------------------|
| 153252201 | Zinc transporter ZIP6 isoform 1 | SLC39A6   | S478        | YESQLsTNEEKV<br>DTDDRTEGYLR |

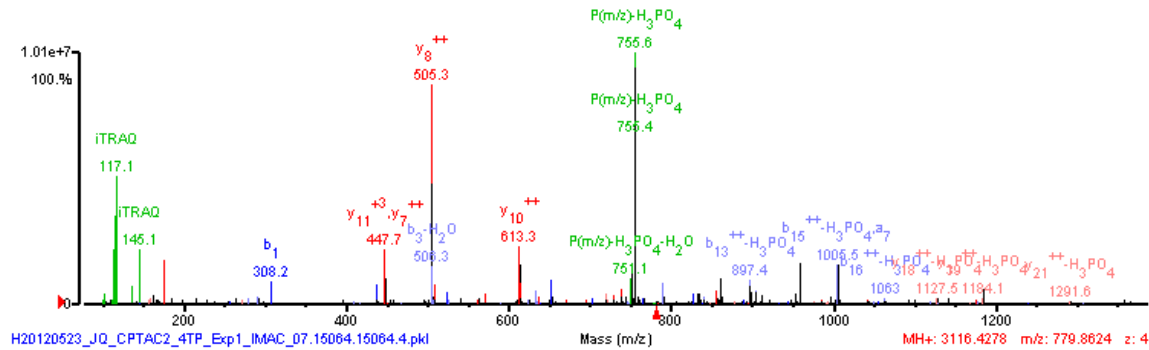

| GI-number | Protein name                                         | Gene name | Phosphosite | Sequence            |
|-----------|------------------------------------------------------|-----------|-------------|---------------------|
| 29725609  | Epidermal growth factor receptor isoform a precursor | EGFR      | T693        | ELVEPLtPSGEAPNQALLR |

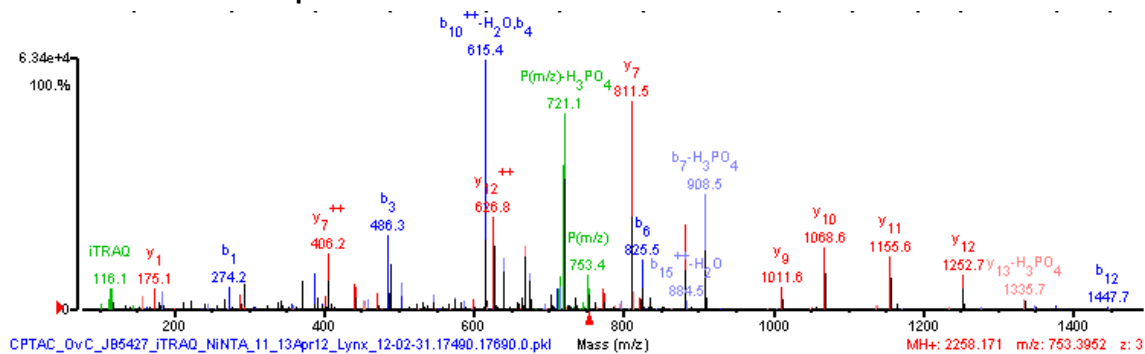

| GI-number | Protein name                                              | Gene name | Phosphosite | Sequence       |
|-----------|-----------------------------------------------------------|-----------|-------------|----------------|
| 19745184  | Cyclic AMP-responsive element-binding protein 1 isoform B | CREB1     | S142        | ILNDLsSDAPGVPR |

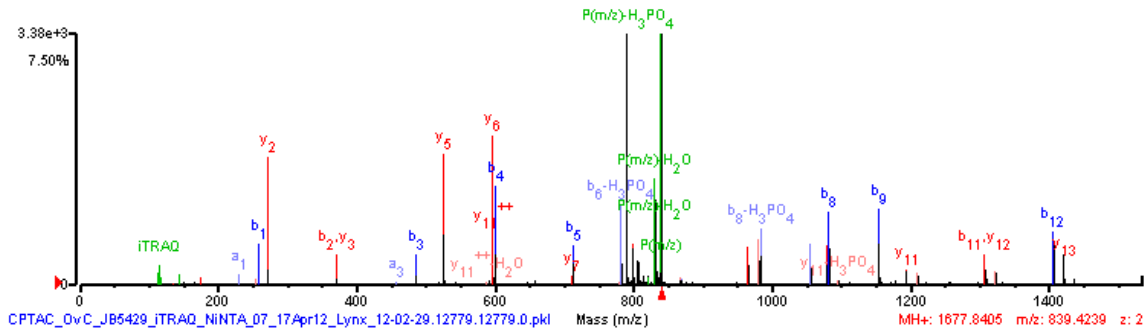

| GI-number | Protein name                                  | Gene name | Phosphosite | Sequence          |
|-----------|-----------------------------------------------|-----------|-------------|-------------------|
| 19923723  | Ribosomal protein S6 kinase delta-1 isoform a | RPS6KC1   | S583        | FFPND DPEAVS*s*PR |

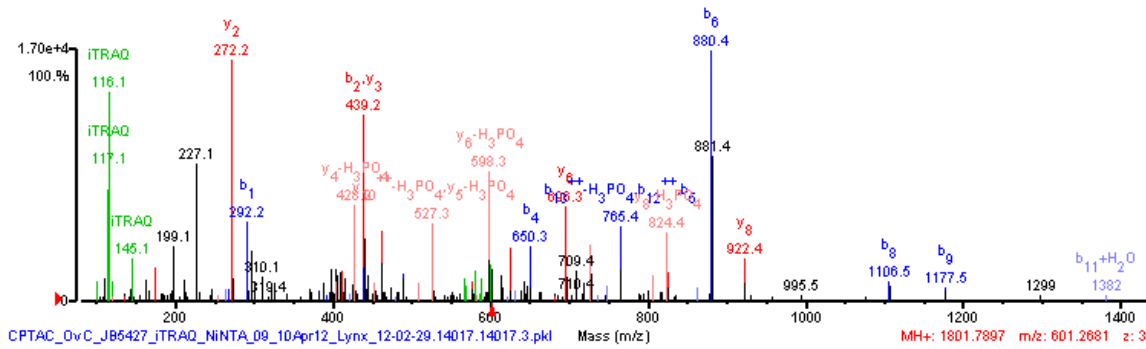

| GI-number | Protein name                                 | Gene name | Phosphosite | Sequence            |
|-----------|----------------------------------------------|-----------|-------------|---------------------|
| 91718899  | Mitogen-activated protein kinase 3 isoform 1 | MAPK3     | Y204        | IADPEHDHTGFLTEyVATR |

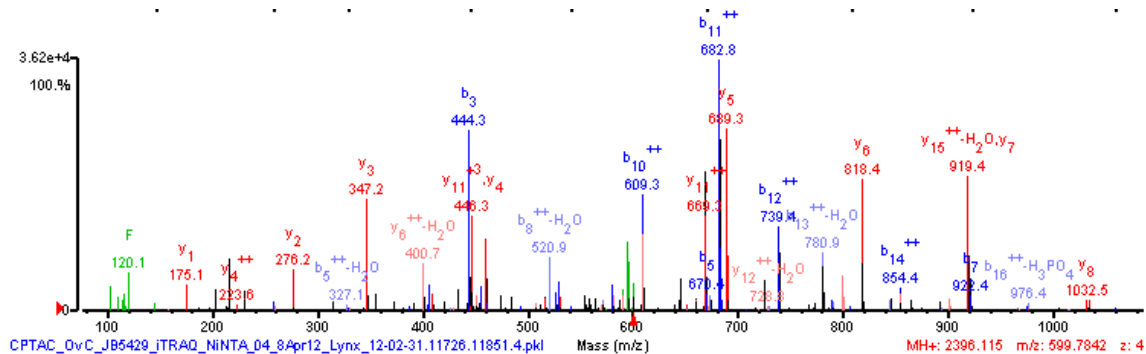



| GI-number | Protein name                                 | Gene name | Phosphosite | Sequence       |
|-----------|----------------------------------------------|-----------|-------------|----------------|
| 52630440  | Peptidyl-prolyl cis-trans isomerase<br>FKBP8 | FKBP8     | S297        | SCSLVLEHQPDNIK |

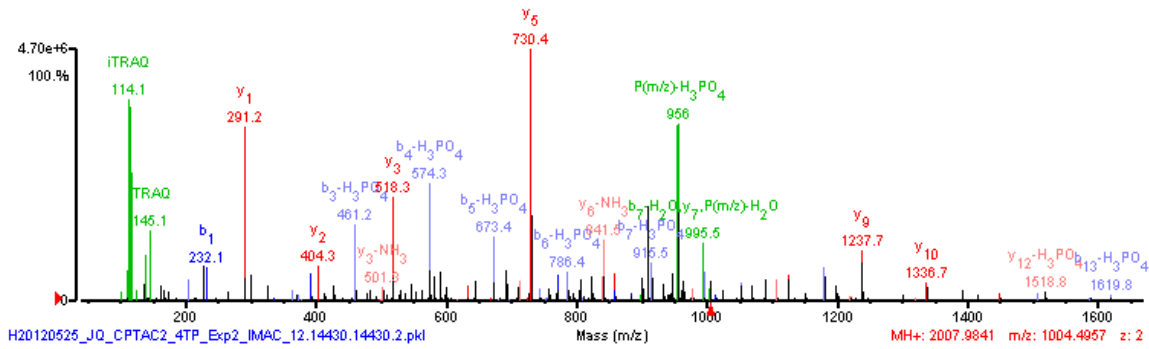

| GI-number | Protein name                                                | Gene name | Phosphosite | Sequence                            |
|-----------|-------------------------------------------------------------|-----------|-------------|-------------------------------------|
| 117189975 | Heterogeneous nuclear<br>ribonucleoproteins C1/C2 isoform a | HNRNPC    | S115        | SAAEmYGSVTEHPSPsPLL<br>SSSFDLDYDFQR |

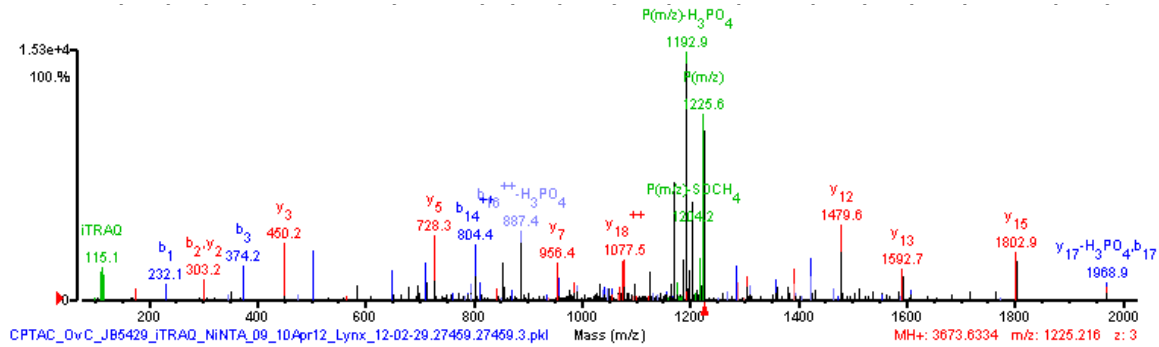

| GI-number | Protein name                                           | Gene name | Phosphosite | Sequence           |
|-----------|--------------------------------------------------------|-----------|-------------|--------------------|
| 38788260  | Nucleosome-remodeling factor<br>subunit BPTF isoform 2 | BPTF      | S1310       | QNsIENDIEEKVSDLASR |

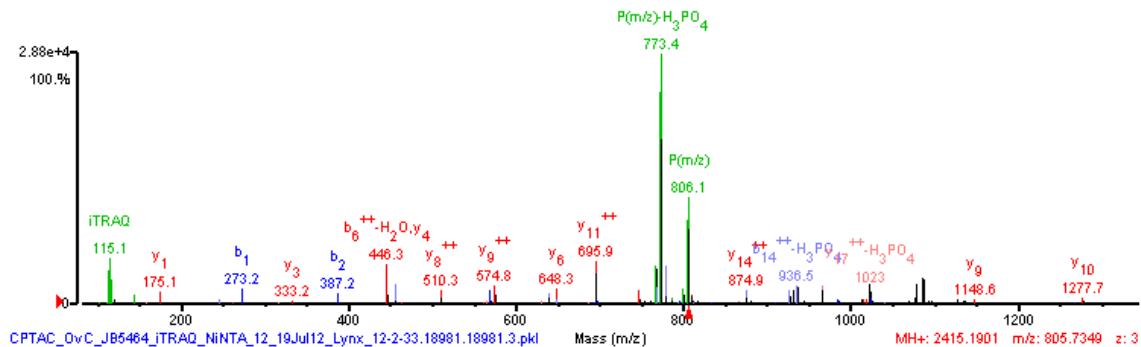

| GI-number | Protein name                          | Gene name | Phosphosite | Sequence   |
|-----------|---------------------------------------|-----------|-------------|------------|
| 197304775 | TBC1 domain family member 5 isoform b | TBC1D5    | S522        | SEsmPVQLNK |

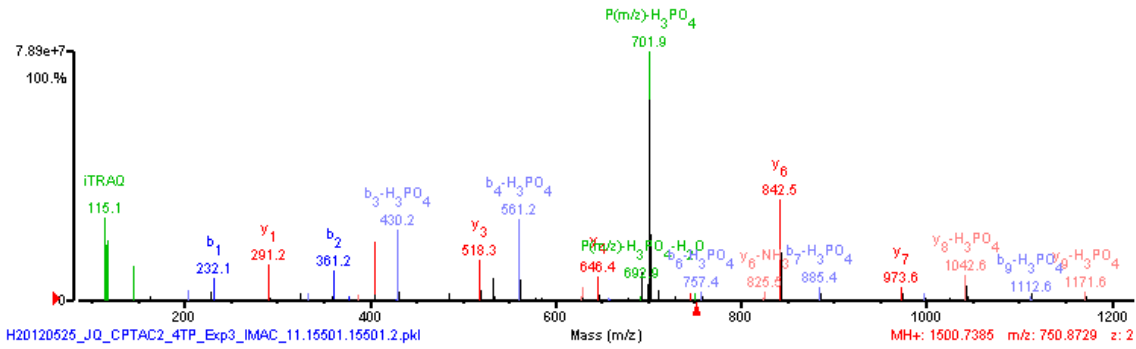

| GI-number | Protein name                                        | Gene name | Phosphosite | Sequence                |
|-----------|-----------------------------------------------------|-----------|-------------|-------------------------|
| 14141152  | Heterogeneous nuclear ribonucleoprotein M isoform a | HNRNPM    | S637        | GNFGGSFAGsFGGAGGHAPGVAR |

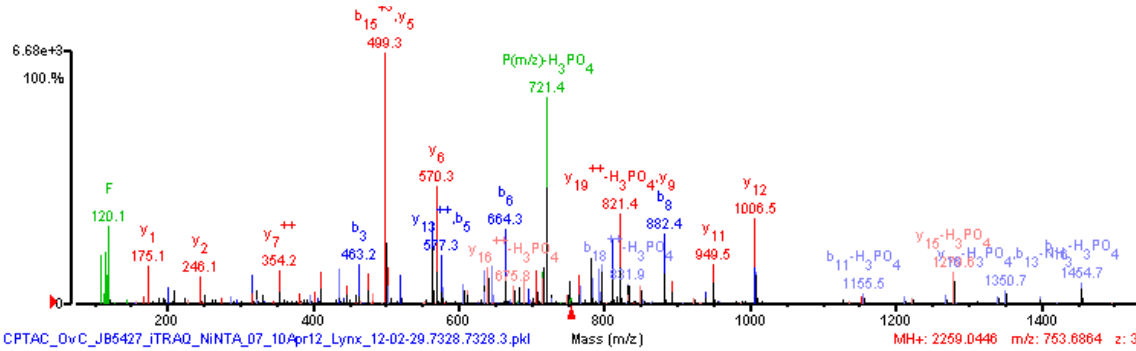

| GI-number | Protein name                                               | Gene name | Phosphosite | Sequence           |
|-----------|------------------------------------------------------------|-----------|-------------|--------------------|
| 183396804 | Regulation of nuclear pre-mRNA domain-containing protein 2 | RPRD2     | S1099       | RmsGEPIQTVESIRVPGK |

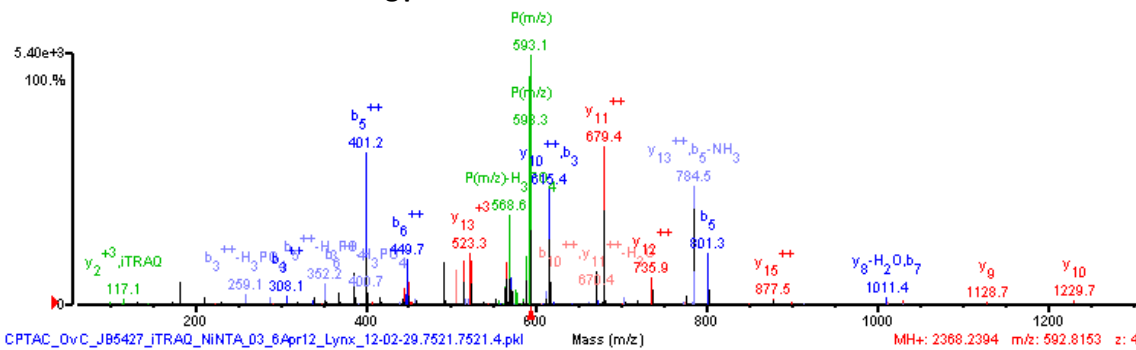

| GI-number | Protein name | Gene name | Phosphosite | Sequence                      |
|-----------|--------------|-----------|-------------|-------------------------------|
| 20070205  | Ladinin-1    | LAD1      | S356        | LPPVTLQVKIPSKE<br>EEADmSsPTQR |

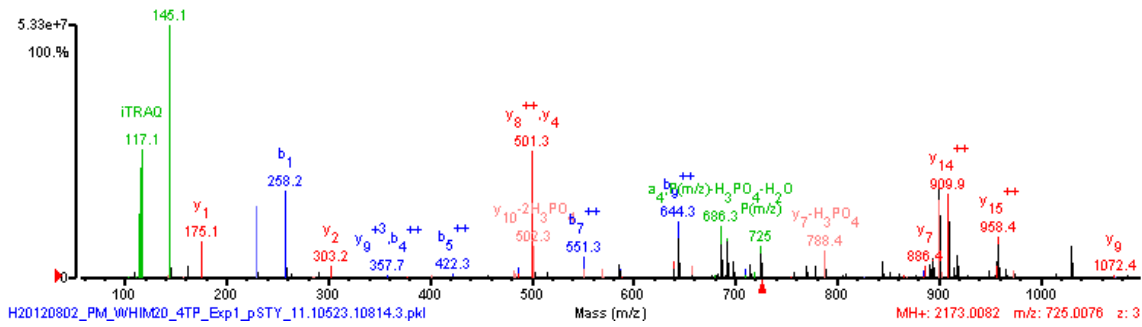

| GI-number | Protein name                               | Gene name | Phosphosite | Sequence     |
|-----------|--------------------------------------------|-----------|-------------|--------------|
| 13559514  | Phosphatidylinositol 4-kinase type 2-alpha | PI4K2A    | S462        | SSsESYTSFQSR |

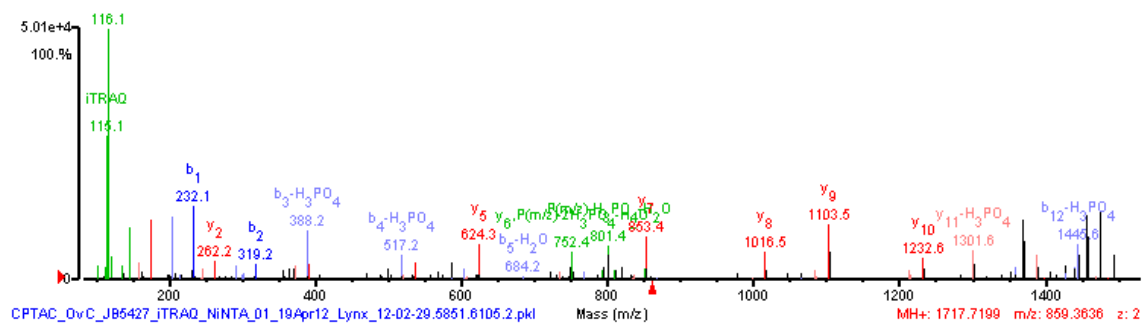

| GI-number | Protein name       | Gene name | Phosphosite | Sequence               |
|-----------|--------------------|-----------|-------------|------------------------|
| 21262466  | Matrin-3 isoform a | MATR3     | S188        | RDsFDDRGPSLNPVLDYDHGSR |

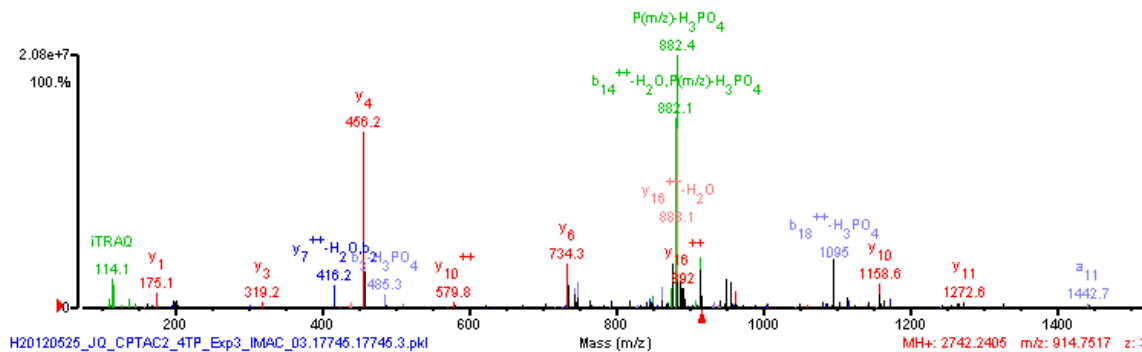

| GI-number | Protein name                                   | Gene name | Phosphosite | Sequence           |
|-----------|------------------------------------------------|-----------|-------------|--------------------|
| 71274144  | AT-hook DNA-binding motif-containing protein 1 | AHDC1     | S1187       | ANsEASSSEGQSSLSLEK |

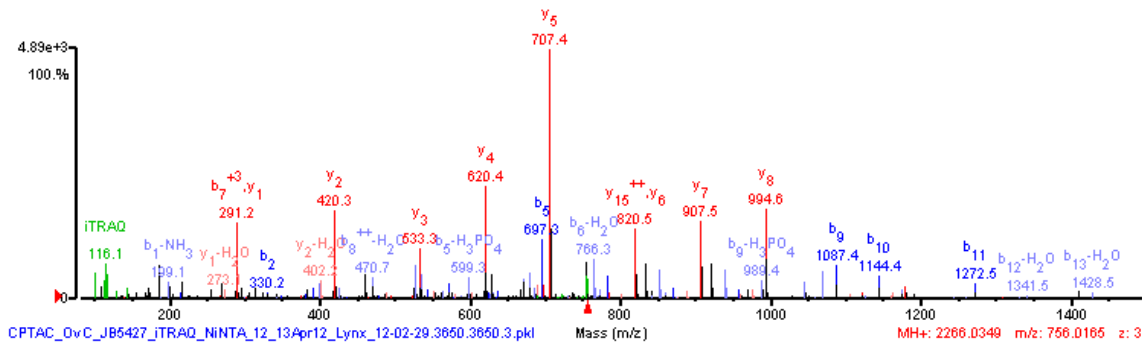

| GI-number | Protein name                  | Gene name | Phosphosite | Sequence               |
|-----------|-------------------------------|-----------|-------------|------------------------|
| 10835069  | Bcl2 antagonist of cell death | BAD       | S75         | HSSYPAGTEDDEGMGEEPSPFR |

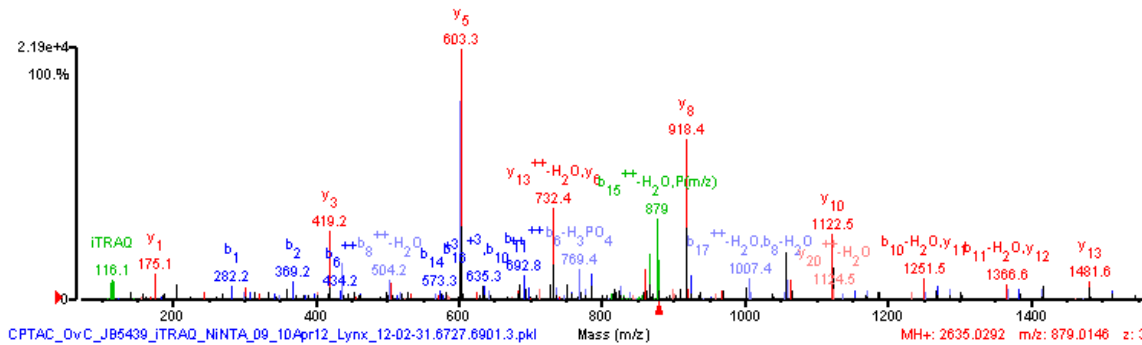

| GI-number | Protein name                                                                  | Gene name | Phosphosite | Sequence   |
|-----------|-------------------------------------------------------------------------------|-----------|-------------|------------|
| 4505581   | Interferon-inducible double stranded RNA-dependent protein kinase activator A | PRKRA     | S18         | EDsGTFSLGK |

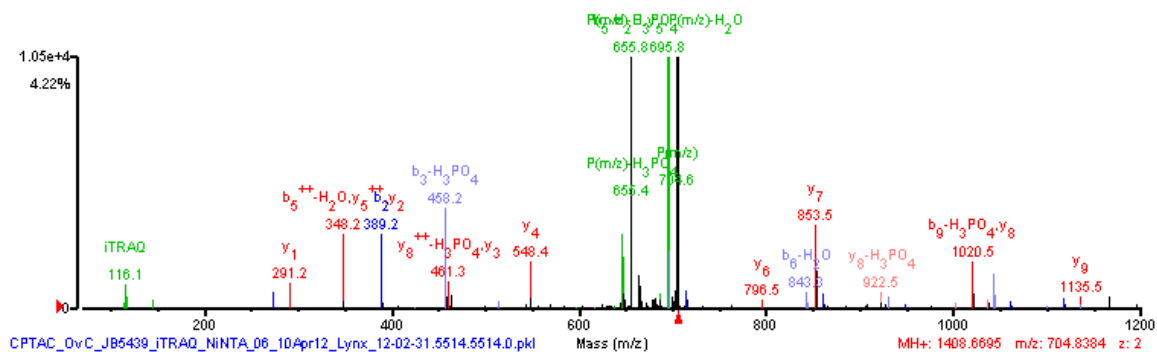

| GI-number | Protein name          | Gene name | Phosphosite | Sequence          |
|-----------|-----------------------|-----------|-------------|-------------------|
| 57634536  | La-related protein 4B | LARP4B    | S568        | TLsADASVNTLPVVVSR |

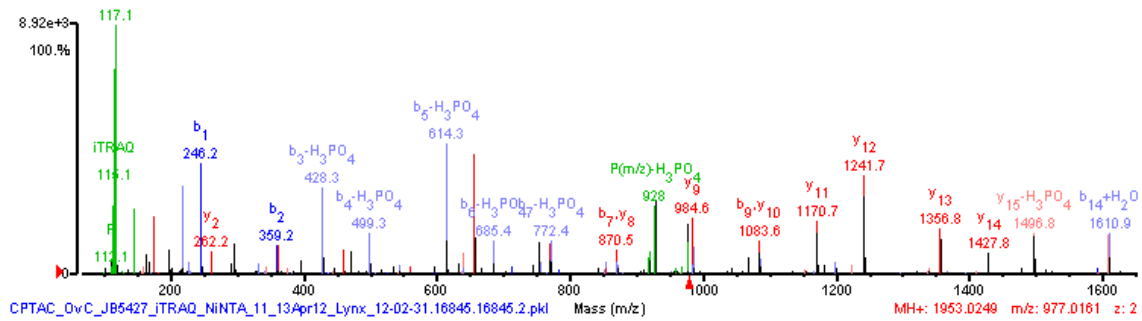

| GI-number | Protein name                      | Gene name    | Phosphosite | Sequence             |
|-----------|-----------------------------------|--------------|-------------|----------------------|
| 209180457 | Target of Myb protein 1 isoform 2 | LOC100128526 | T164        | GLEFPMTDLDMLSPIHTPQR |

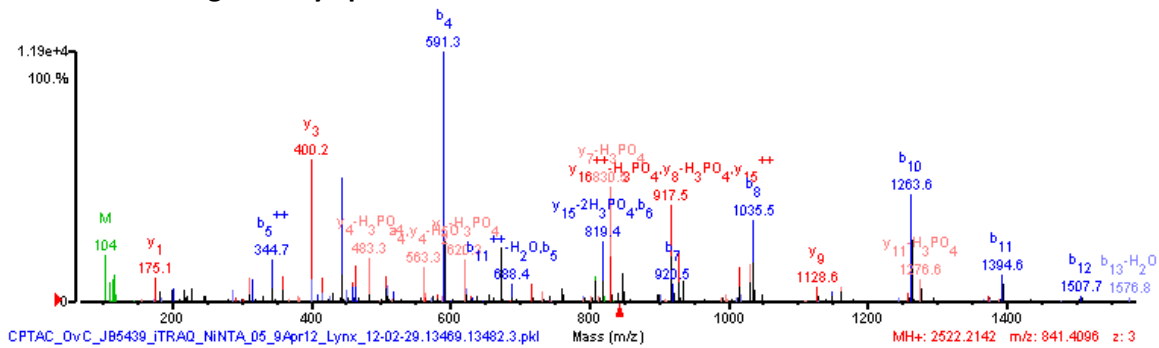

| GI-number | Protein name                                                | Gene name | Phosphosite | Sequence                            |
|-----------|-------------------------------------------------------------|-----------|-------------|-------------------------------------|
| 150417986 | Brefeldin A-inhibited guanine nucleotide-exchange protein 2 | ARFGEF2   | S1024       | EGSLKIGHTLAGEEFM<br>GLGLGNLVSGGVDKR |

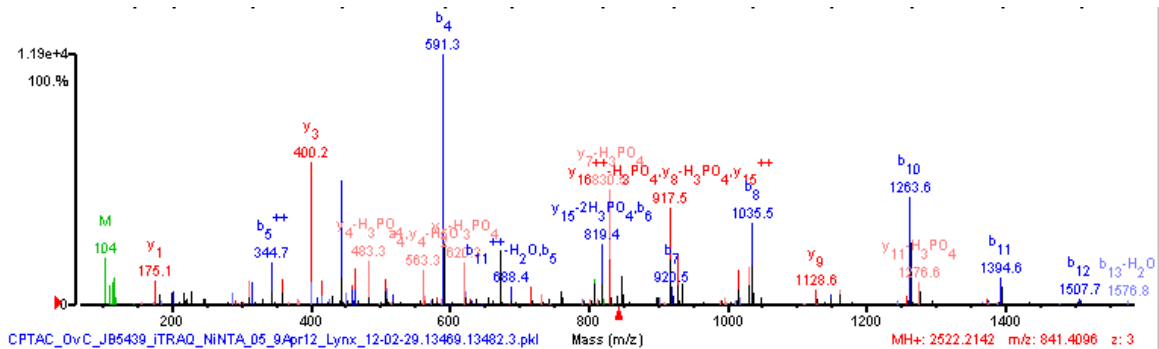

| GI-number | Protein name                    | Gene name | Phosphosite | Sequence            |
|-----------|---------------------------------|-----------|-------------|---------------------|
| 52426745  | E3 ubiquitin-protein ligase CBL | CBL       | S619        | ELTNRHsLPFSLPSQMEPR |

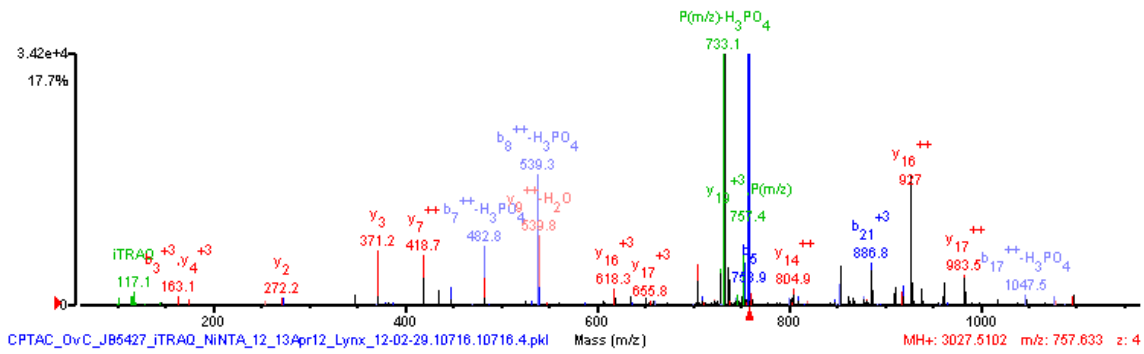

| GI-number | Protein name                               | Gene name | Phosphosite | Sequence |
|-----------|--------------------------------------------|-----------|-------------|----------|
| 47519639  | Microtubule-associated protein 4 isoform 1 | MAP4      | S825        | sPSTLLPK |

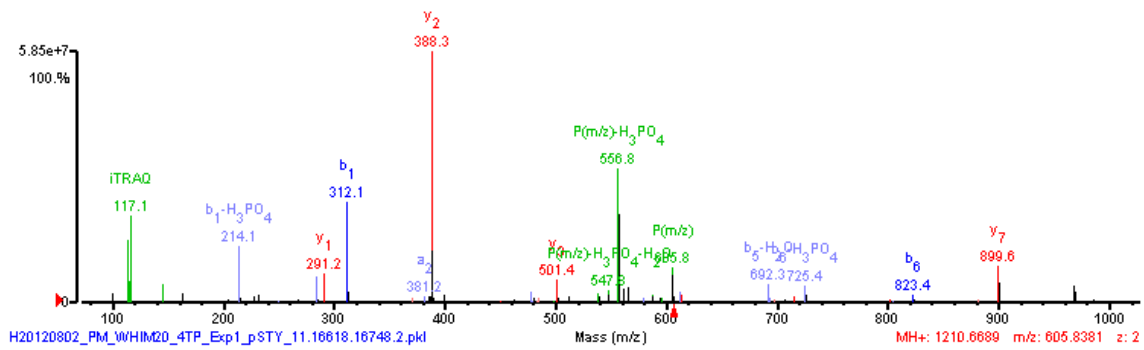

| GI-number | Protein name                 | Gene name | Phosphosite | Sequence                |
|-----------|------------------------------|-----------|-------------|-------------------------|
| 5453710   | LIM and SH3 domain protein 1 | LASP1     | S146        | mGPSGGEGmEPERRDsQDGSSYR |

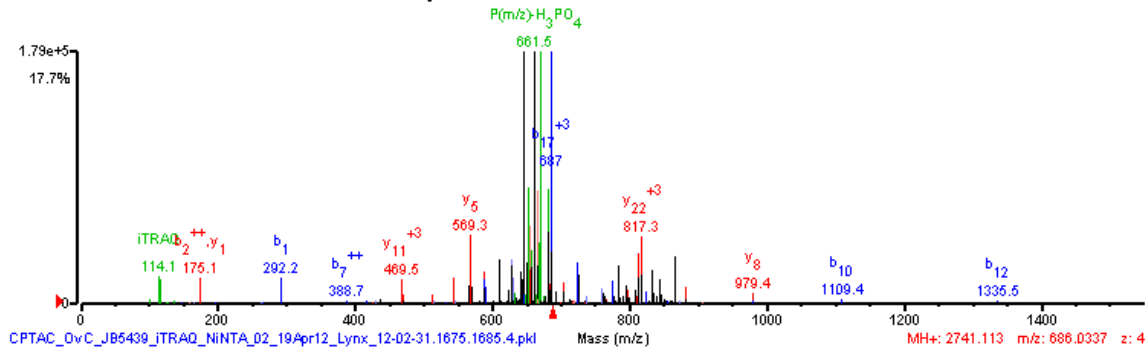

| GI-number | Protein name                       | Gene name | Phosphosite | Sequence           |
|-----------|------------------------------------|-----------|-------------|--------------------|
| 20986531  | Mitogen-activated protein kinase 1 | MAPK1     | Y187        | VADPDHDTGFLTEyVATR |

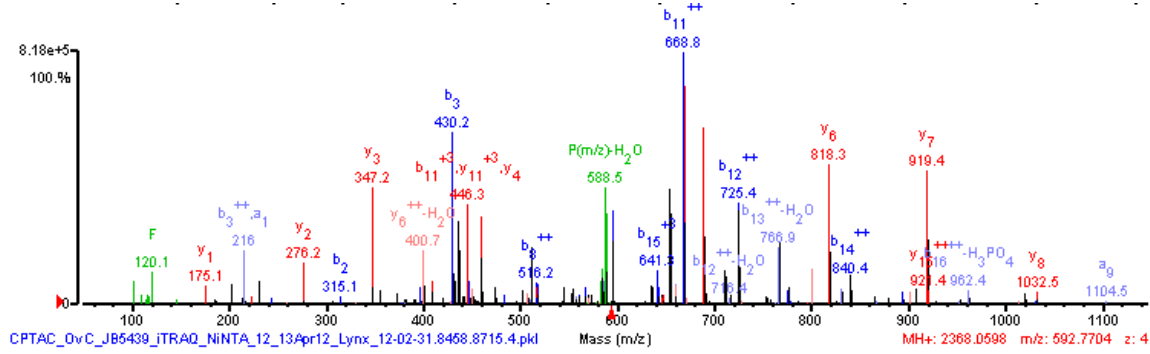

| GI-number | Protein name                | Gene name | Phosphosite | Sequence              |
|-----------|-----------------------------|-----------|-------------|-----------------------|
| 31377782  | Protein kinase C delta type | PRKCD     | S304        | RSDs*AS*SEPVGIYQGFEKK |

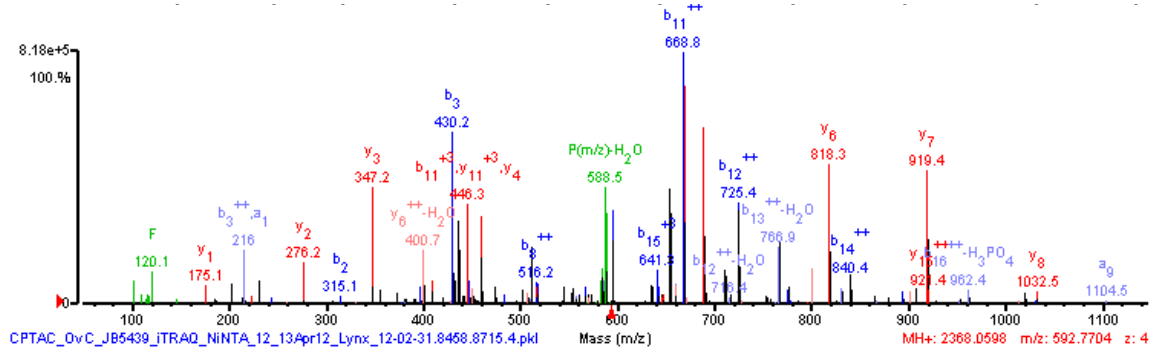

| GI-number | Protein name            | Gene name | Phosphosite | Sequence           |
|-----------|-------------------------|-----------|-------------|--------------------|
| 48928019  | NEDD4-binding protein 1 | N4BP1     | S300        | KQFsLENVQEGEILHDAK |

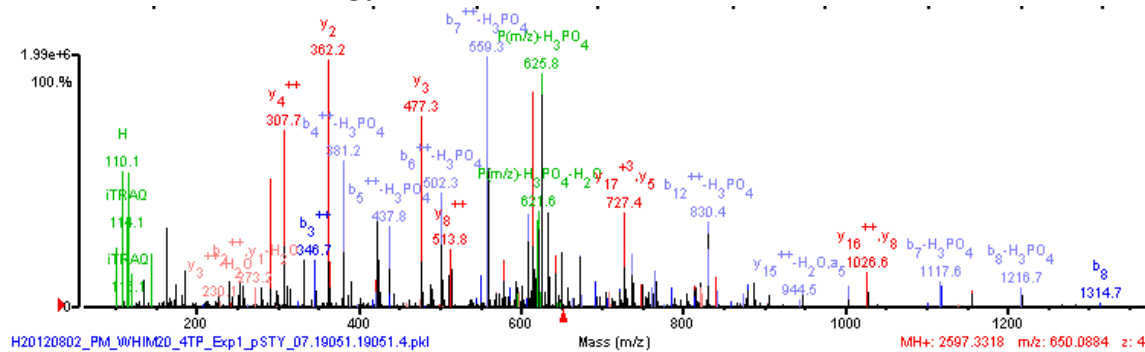

| GI-number | Protein name                                                | Gene name | Phosphosite | Sequence  |
|-----------|-------------------------------------------------------------|-----------|-------------|-----------|
| 221219024 | Pleckstrin homology-like domain family B member 1 isoform a | PHLDB1    | S430        | TFsDGLATR |

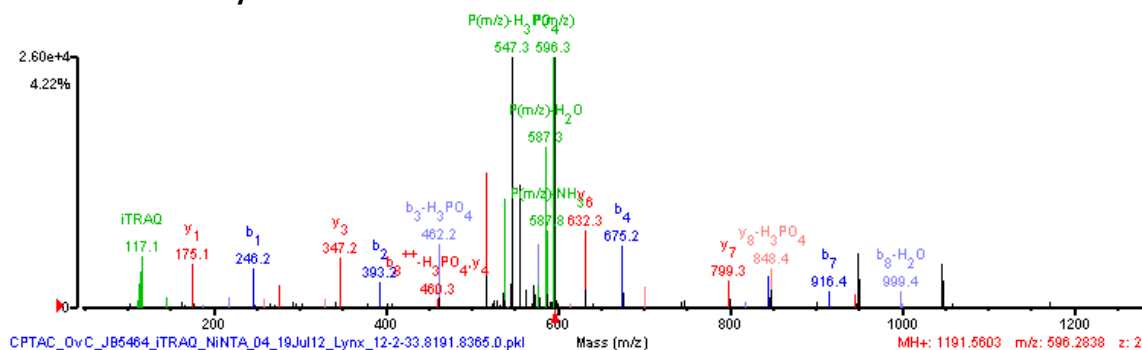

| GI-number | Protein name                | Gene name | Phosphosite | Sequence     |
|-----------|-----------------------------|-----------|-------------|--------------|
| 114688046 | TBC1 domain family member 4 | TBC1D4    | S566        | sLTSSLENIFSR |

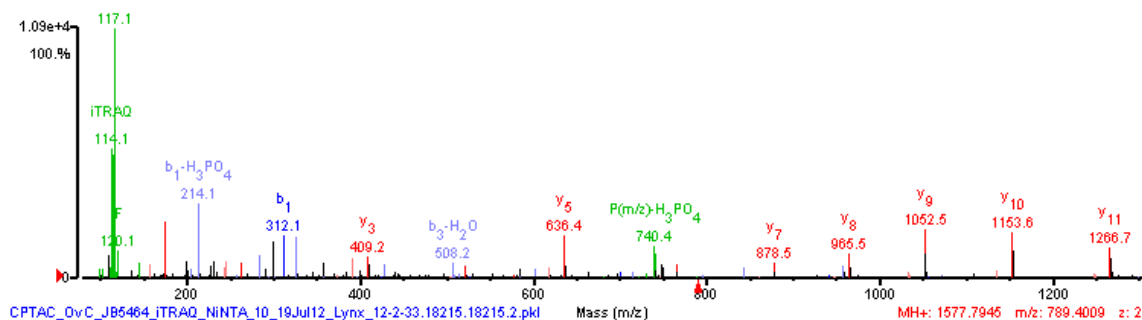

| GI-number | Protein name                                 | Gene name | Phosphosite | Sequence        |
|-----------|----------------------------------------------|-----------|-------------|-----------------|
| 157384982 | Transducin-like enhancer protein 3 isoform a | TLE3      | T328        | NDAPtPGTSTTPGLR |

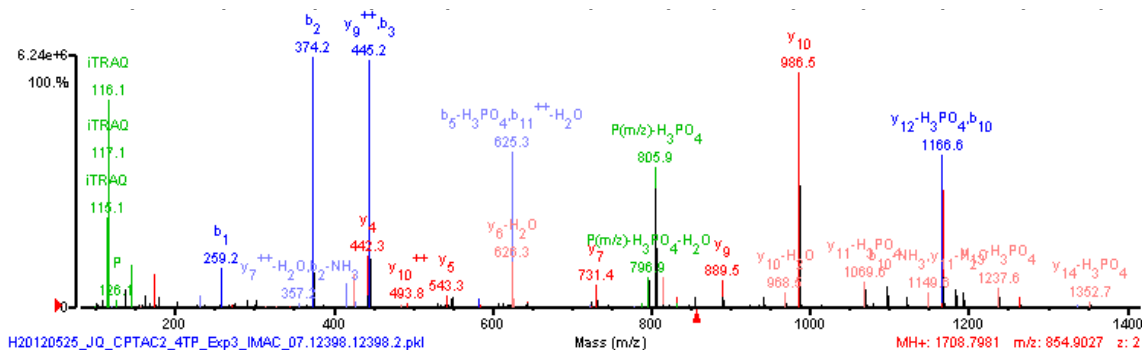



| GI-number | Protein name     | Gene name | Phosphosite | Sequence   |
|-----------|------------------|-----------|-------------|------------|
| 333108224 | Afadin isoform 1 | MLLT4     | S215        | TIsNPEVVMK |

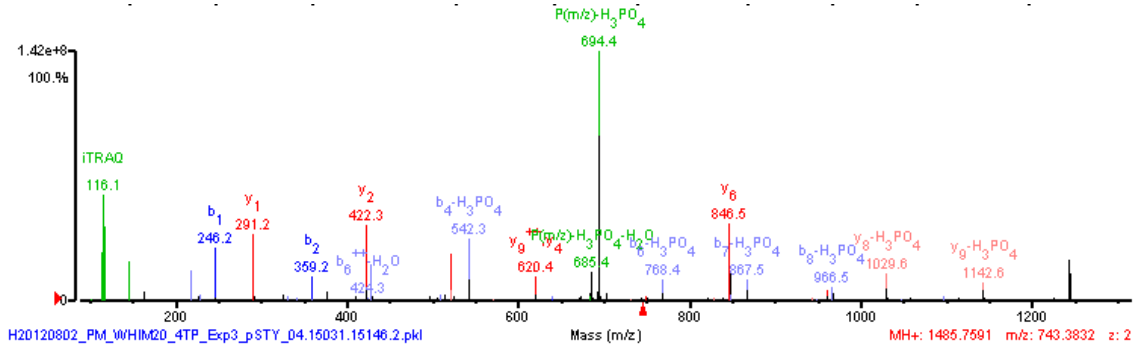

| GI-number | Protein name            | Gene name | Phosphosite | Sequence     |
|-----------|-------------------------|-----------|-------------|--------------|
| 48928019  | NEDD4-binding protein 1 | N4BP1     | T242        | NKAGtPVSELTK |

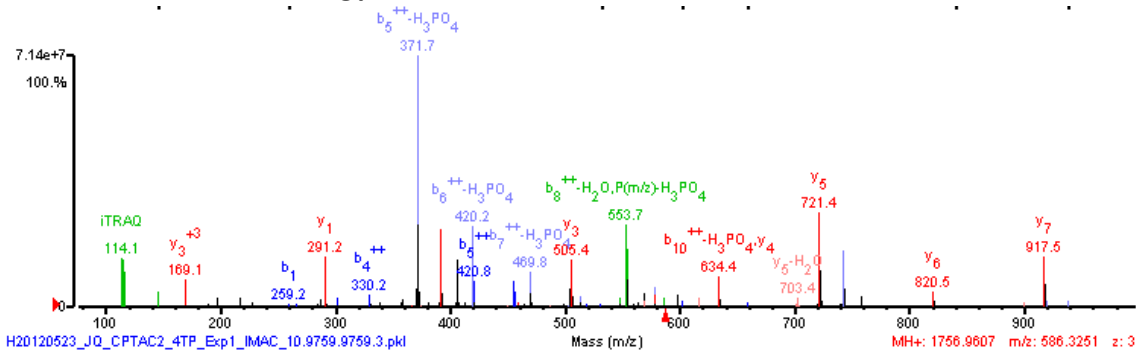

| GI-number | Protein name                          | Gene name | Phosphosite | Sequence                     |
|-----------|---------------------------------------|-----------|-------------|------------------------------|
| 194595509 | Spectrin alpha chain, brain isoform 1 | SPTAN1    | S1029       | KLDPAQsASRENLL<br>LEEQGSIALR |

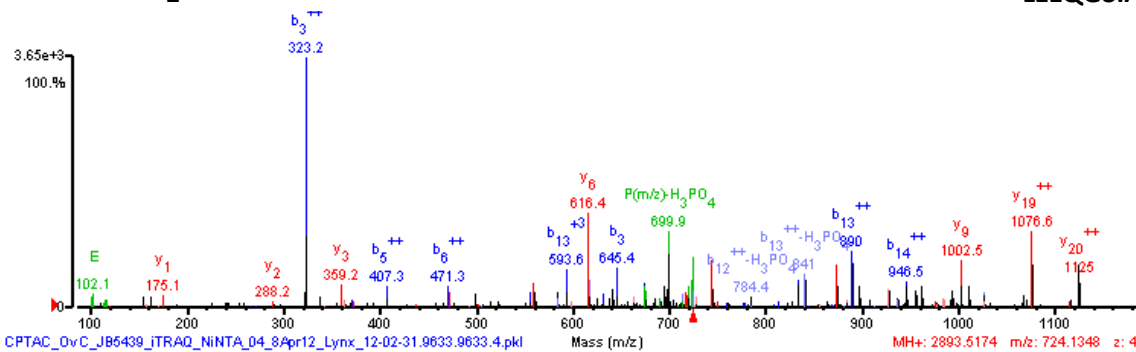



| GI-number | Protein name                                              | Gene name | Phosphosite | Sequence    |
|-----------|-----------------------------------------------------------|-----------|-------------|-------------|
| 92087055  | PERQ amino acid-rich with GYF domain-containing protein 1 | GIGYF1    | S137        | sIEEGDGAfGR |

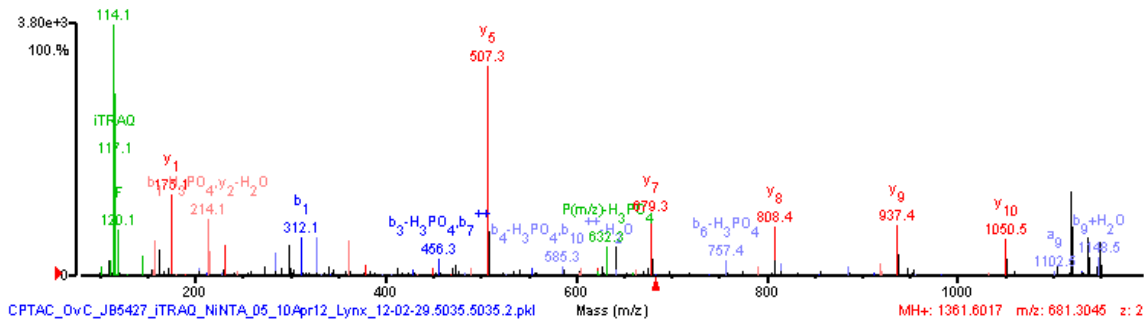

| GI-number | Protein name                            | Gene name | Phosphosite | Sequence         |
|-----------|-----------------------------------------|-----------|-------------|------------------|
| 148368962 | Pseudopodium-enriched atypical kinase 1 | SGK269    | S1217       | GLDIESYDsLERPLRK |

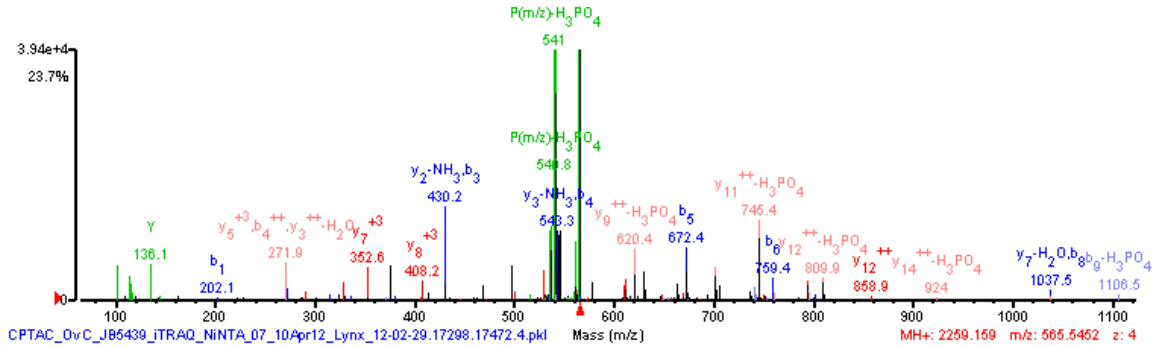

| GI-number | Protein name                                                 | Gene name | Phosphosite | Sequence            |
|-----------|--------------------------------------------------------------|-----------|-------------|---------------------|
| 302699245 | Eukaryotic translation initiation factor 4 gamma 1 isoform 6 | EIF4G1    | S1084       | ITKPGsIDSNNQLFAPGGR |

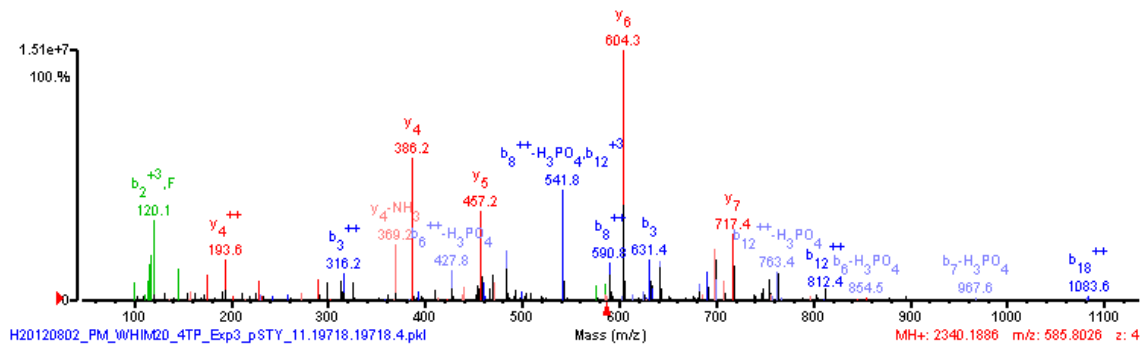

| GI-number | Protein name                                                | Gene name | Phosphosite | Sequence            |
|-----------|-------------------------------------------------------------|-----------|-------------|---------------------|
| 196114951 | Tyrosine-protein phosphatase non-receptor type 12 isoform 1 | PTPN12    | S449        | KVPLQEGPKsFDGNTLLNR |

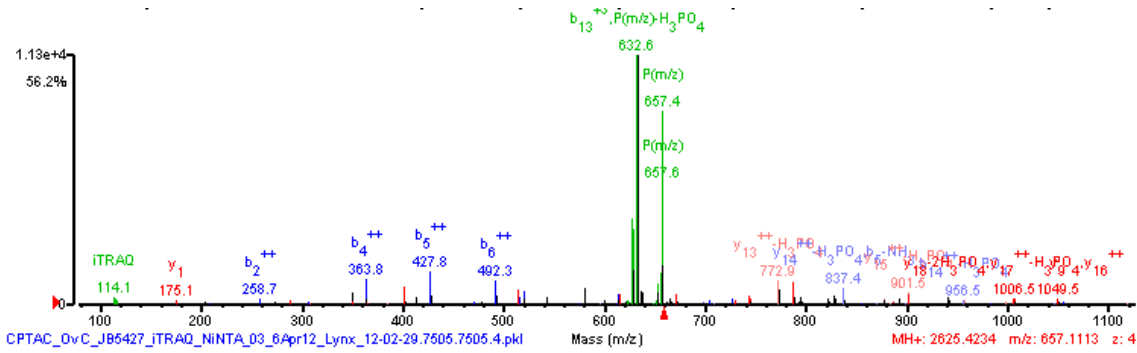

| GI-number | Protein name                                        | Gene name | Phosphosite | Sequence           |
|-----------|-----------------------------------------------------|-----------|-------------|--------------------|
| 61743954  | Neuroblast differentiation-associated protein AHNAK | AHNAK     | S379        | LKGPQITGPsLEGDLGLK |

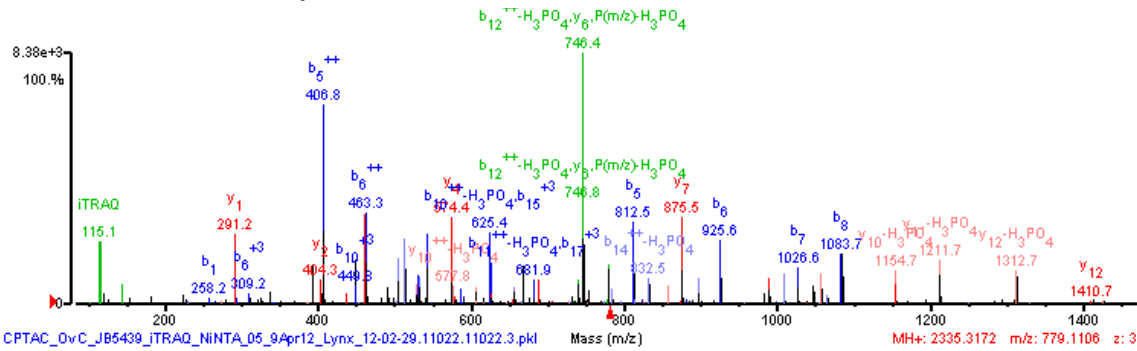

| GI-number | Protein name   | Gene name | Phosphosite | Sequence           |
|-----------|----------------|-----------|-------------|--------------------|
| 115298682 | Protein PRRC2C | BAT2L2    | T2673       | AFSGSIDIKPGtPPIAGR |

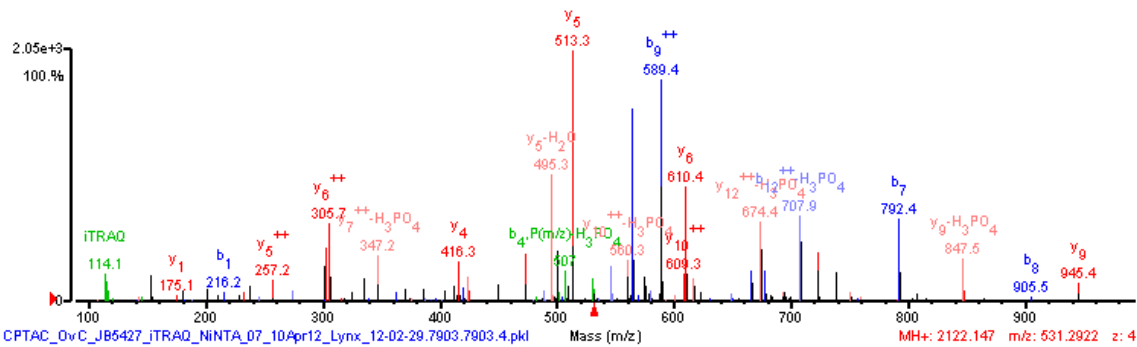

| GI-number | Protein name                             | Gene name | Phosphosite | Sequence                   |
|-----------|------------------------------------------|-----------|-------------|----------------------------|
| 21070997  | Stromal interaction molecule 1 precursor | STIM1     | S575        | LIEGVHPGSLVE<br>KLPDsPALAK |

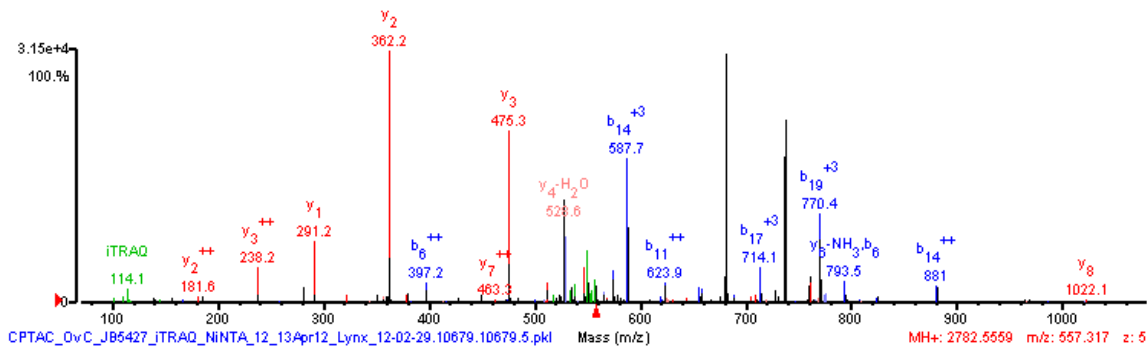

| GI-number | Protein name   | Gene name | Phosphosite | Sequence     |
|-----------|----------------|-----------|-------------|--------------|
| 115298682 | Protein PRRC2C | BAT2L2    | T2682       | ST*t*PTSSPFR |

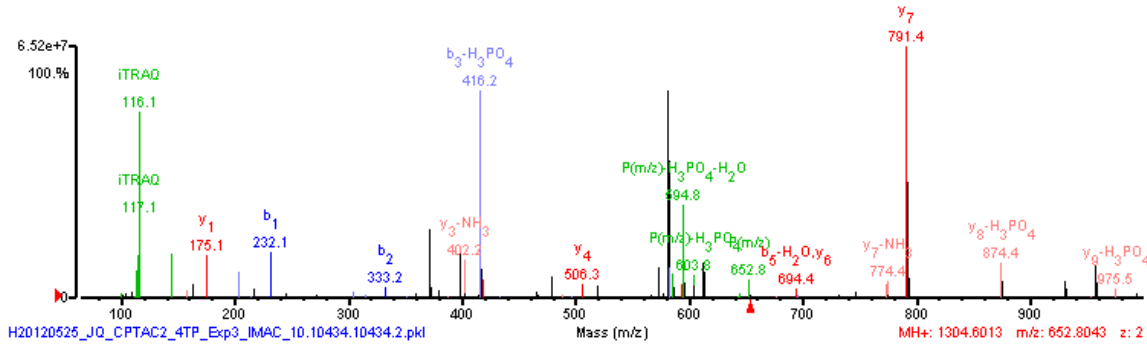

| GI-number | Protein name     | Gene name | Phosphosite | Sequence     |
|-----------|------------------|-----------|-------------|--------------|
| 10863895  | Thymosin beta-10 | TMSB10    | T23         | TETQEKNTLPTK |

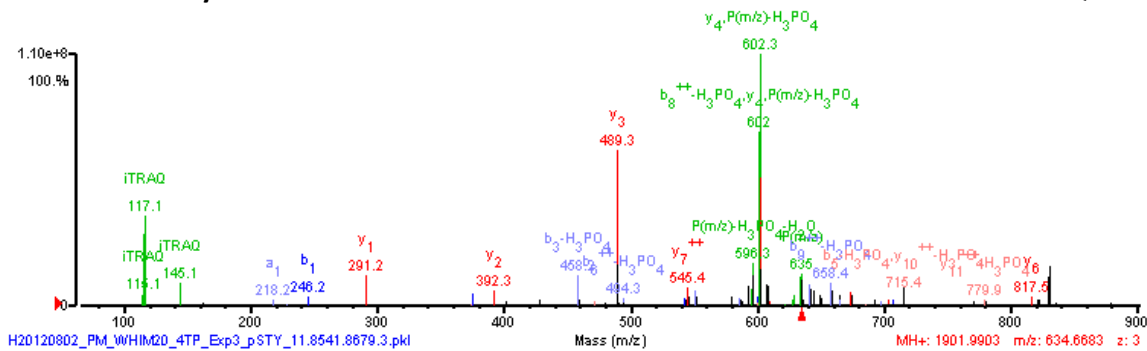

| GI-number | Protein name                               | Gene name | Phosphosite | Sequence       |
|-----------|--------------------------------------------|-----------|-------------|----------------|
| 47519639  | Microtubule-associated protein 4 isoform 1 | MAP4      | S941        | VGsTENIKHQGGGR |

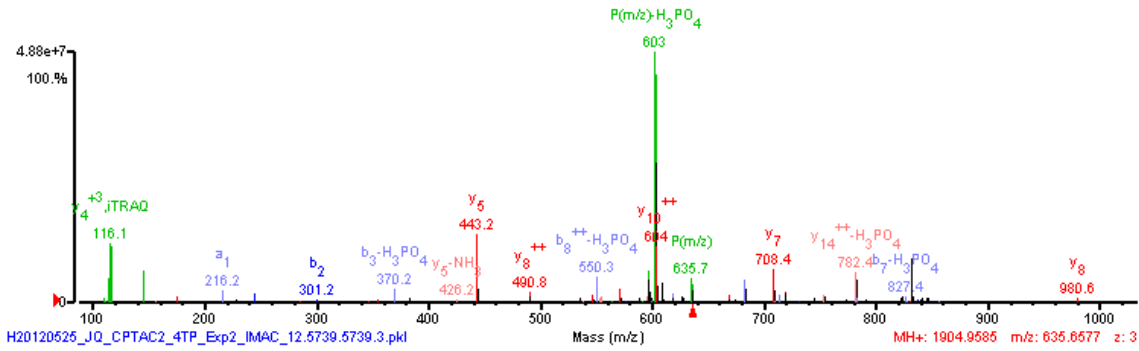

| GI-number | Protein name                           | Gene name | Phosphosite | Sequence |
|-----------|----------------------------------------|-----------|-------------|----------|
| 224994221 | SH3 domain-binding protein 2 isoform b | SH3BP2    | S484        | SFsFEKPR |

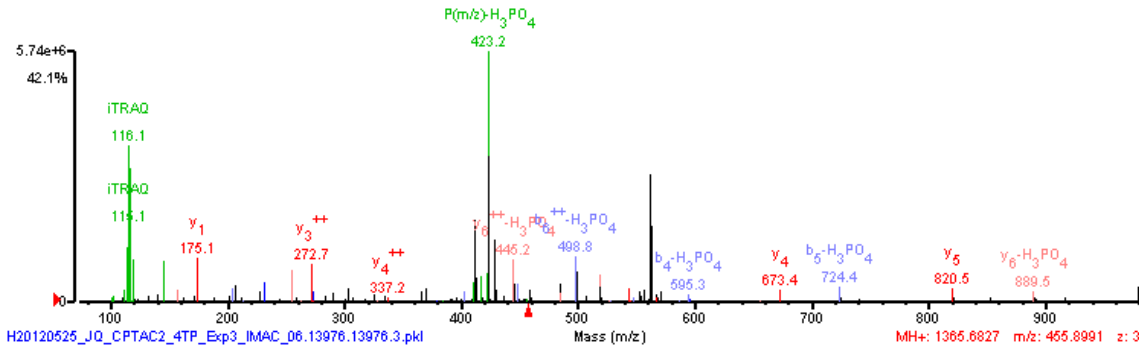

| GI-number | Protein name                                  | Gene name | Phosphosite | Sequence  |
|-----------|-----------------------------------------------|-----------|-------------|-----------|
| 30089916  | Phosphofurin acidic cluster sorting protein 1 | PACS1     | S519        | QLsKPLSER |

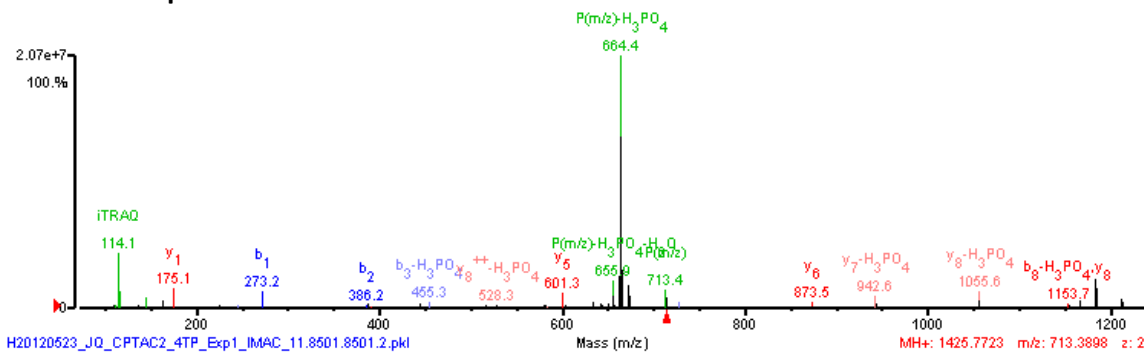

| GI-number | Protein name                   | Gene name | Phosphosite | Sequence             |
|-----------|--------------------------------|-----------|-------------|----------------------|
| 62198235  | Drebrin-like protein isoform b | DBNL      | T291        | QLtQPETHFGREPAAISRPR |

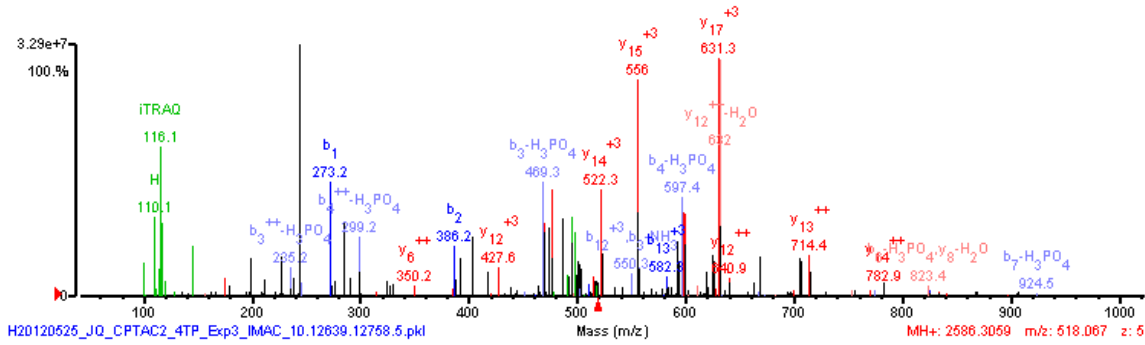

| GI-number | Protein name   | Gene name | Phosphosite | Sequence      |
|-----------|----------------|-----------|-------------|---------------|
| 156766050 | Protein AHNAK2 | AHNAK2    | S842        | FKMPsFGVSAPGK |

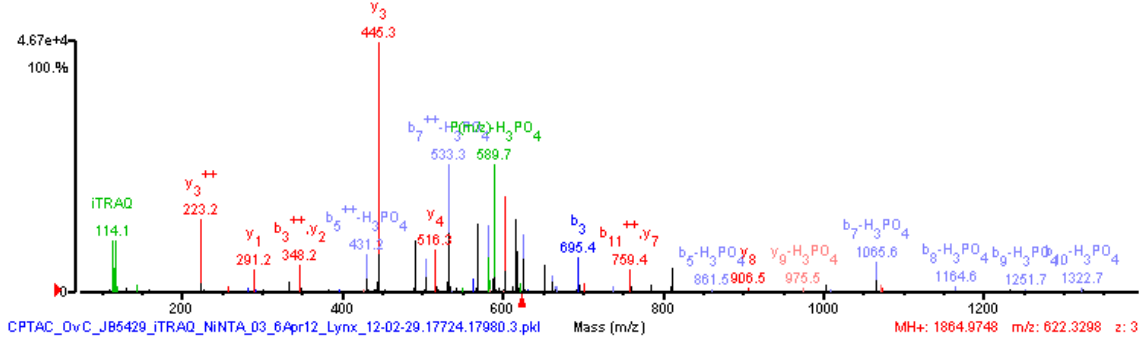

Supplement: supp_M113.036392_mcp.M113.036392-1.pdf [file supp_M113.036392_mcp.M113.036392-1.pdf]
